# Supplementary material for: BODIPY(aryl)iodonium salts in the efficient synthesis of diversely functionalized BODIPYs and selective detection of serum albumin
Source: Royal Society of Chemistry journal article supplement (doi:10.1039/d4ob00336e), 2024-01-01
Supplement: d4ob00336e1.pdf [file d4ob00336e1.pdf]

## Supporting Information

### **BODIPY(aryl)iodonium Salts in the Efficient Synthesis of Diversely Functionalized BODIPYs and Selective Detection of Serum Albumin**

Bintu Kumar,<sup>a</sup> Anindita Bhatta,<sup>b</sup> Prakriti Saraf,<sup>a</sup> Taur Prakash Pandurang<sup>a</sup>, Krishnan Rangan,<sup>c</sup> Madhushree Sarkar,<sup>a</sup> Sivaprasad Mitra,<sup>\*b</sup> and Dalip Kumar<sup>\*a</sup>

<sup>a</sup>Department of Chemistry, Birla Institute of Technology and Science, Pilani Campus- 333 031, India; E-mail: dalipk@pilani.bits-pilani.ac.in

<sup>b</sup>Department of Chemistry, North-Eastern Hill University, Shillong-793022, India; E-mail: smitra@nehu.ac.in

<sup>c</sup>Department of Chemistry, Birla Institute of Technology and Science, Hyderabad Campus- 500 078, India; E-mail: rkrishnan@hyderabad.bits-pilani.ac.in

#### Table of Contents

|      |                                                             |         |
|------|-------------------------------------------------------------|---------|
| I.   | Experimental section                                        | S2-S3   |
| II.  | Single crystal XRD experiments                              | S3-S11  |
| III. | General experimental procedure                              | S11-S18 |
| IV.  | Spectra (1H, 13C NMR and HRMS) of the synthesized compounds | S19-S52 |
| V.   | Photophysical properties                                    | S52-S59 |

## I. Experimental section

### Materials and methods

The reagents and solvents were procured from commercial sources sigma-aldrich and spectrochem and used. Dichloromethane was freshly distilled in presence of calcium hydride prior to use. For studying interaction with serum albumin aqueous solution was prepared using purified water, collected from an Elix 10 water purification system (Millipore India Pvt. Ltd). Protease-free, heat shock fraction, BSA was obtained from Sigma-Aldrich (Cat. No. B4287, Mol. Wt. ~66 kDa). Other biomolecules used in this study viz. N-acetyl-L-Cystine (SRL India, cat. no. 47866, MW=163.20 g/mol); Fibrinogen (Sigma, Product No. F4883, MW=340 kDa); Glutathione (SRL India, cat. no. 48938, MW=307.32 g/mol); Lysozyme (Thermo Scientific, Product No. 89833, MW=14.38 kDa); Collagen, Sigma, Product No. C8374, MW=161 kDa) were used as received. Silica gel for chromatography and TLC plates (60 F<sub>254</sub>) was procured from Merck. Melting points were recorded on E-Z melting apparatus. NMR spectra were measured on a Bruker Advance II (400 MHz for <sup>1</sup>H and 100 MHz for <sup>13</sup>C) instrument using solvents DMSO-*d*<sub>6</sub> and CDCl<sub>3</sub>. HRMS spectra were obtained on a 6200 series TOF (Q-TOF, B.06.01 (B6172 SP1). Steady-state absorption spectra were recorded on a Perkin-Elmer model Lambda25 absorption spectrophotometer. Fluorescence spectra were taken in a Hitachi model FL4500 spectrofluorimeter and all the spectra were corrected for the instrument response function. The relative experimental error in the measured photophysical parameters was estimated within ±5%.

### Time-resolved fluorescence experiment

The time-resolved fluorescence decay was measured using a fluorescence spectrometer (QM-40, PTI, USA) outfitted with a TCSPC fluorescence lifetime detection device (PM-3). The instrument response function (IRF), which was collected at the excitation wavelength using a scattering solution, was used to fit the experimentally obtained decay traces using the iterative deconvolution technique based on the Levenberg-Marquardt algorithm

$$I(t) = \sum_i \alpha_i \times \exp\left(-\frac{t}{\tau_i}\right)$$

Where  $\alpha_i$  is the amplitude of the  $i^{\text{th}}$  component associated with fluorescence lifetime  $\tau_i$  such that  $\sum \alpha_i = 1$ . The average fluorescence lifetime for the multi-exponential fluorescence decay function

was calculated as the fractional input of each individual decay component ( $f_i$ ) to the steady-state intensity.

$$\tau_{av} = \sum_i f_i = \frac{\sum_i \alpha_i \tau_i^2}{\sum_i \alpha_i \tau_i}$$

Additionally, using known quantum yield ( $\phi_f$ ) and average lifetime ( $\tau_{av}$ ) values, the radiative ( $k_r$ ) and total non-radiative ( $\sum k_{nr}$ ) decay rate constants in each instance were calculated using the following relations:

$$k_r = \frac{\phi_f}{\tau_{av}}; \quad \sum k_{nr} = \frac{(1 - \phi_f)}{\tau_{av}}$$

### Fluorescence anisotropy studies

Fluorescence anisotropy for the BODIPY-BSA interaction was calculated using the following equation:

$$r = \frac{I_{VV} - GI_{VH}}{I_{VV} + 2GI_{VH}}$$

The fluorescence spectral intensities produced by aligning the excitation and emission polarizers in parallel or perpendicular orientations, respectively, are represented by  $I_{VV}$  and  $I_{VH}$ .  $G$  is the instrument geometry factor.

## II. Single Crystal XRD Experiments

The single crystal XRD data collection and data reduction were performed using CrysAlis PRO on a single crystal Rigaku Oxford XtaLab Pro Kappa dual home/near diffractometer. The crystals were kept at 93 K during data collection using  $\text{CuK}\alpha$  ( $\lambda = 1.54184 \text{ \AA}$ ) radiation. Using Olex2, the structure was solved with the ShelXT structure solution program using Intrinsic Phasing and refined with the ShelXL refinement package using Least Squares minimization.

### X-ray Single Crystal Data for compound **4e** (CCDC: 2294690)

The single crystal of compound (**4e**)  $\text{C}_{38}\text{H}_{41}\text{BCl}_3\text{F}_2\text{IN}_2\text{O}_3\text{S}$  was crystallized as a red block through the slow evaporation of  $\text{CHCl}_3$  solution at room temperature. The compound **4e** was crystallized in the  $P\bar{1}$  space group and the asymmetric unit contains one molecule of **4e** and half of molecule

of chloroform (CHCl<sub>3</sub>). Crystal Data for C<sub>38</sub>H<sub>41</sub>BCl<sub>3</sub>F<sub>2</sub>IN<sub>2</sub>O<sub>3</sub>S (M = 887.85 g/mol): triclinic, space group P-1 (no. 2), a = 8.40960(10) Å, b = 14.7442(2) Å, c = 17.5925(2) Å, α = 109.4650(10)°, β = 94.5770(10)°, γ = 105.5260(10)°, V = 1947.03(4) Å<sup>3</sup>, Z = 2, T = 93(2) K, μ(Cu Kα) = 9.258 mm<sup>-1</sup>, D<sub>calc</sub> = 1.514 g/cm<sup>3</sup>, 21257 reflections measured (6.886° ≤ 2θ ≤ 159.76°), 8171 unique (R<sub>int</sub> = 0.0381, R<sub>sigma</sub> = 0.0414) which were used in all calculations. The final R<sub>1</sub> was 0.0429 (I > 2σ(I)) and wR<sub>2</sub> was 0.1176 (all data). The crystallographic details of the compound **4e** are deposited to the Cambridge Crystallographic (CCDC 2294690). The ORTEP diagram as crystal structure of (**4e**) is illustrated in Fig. S1.

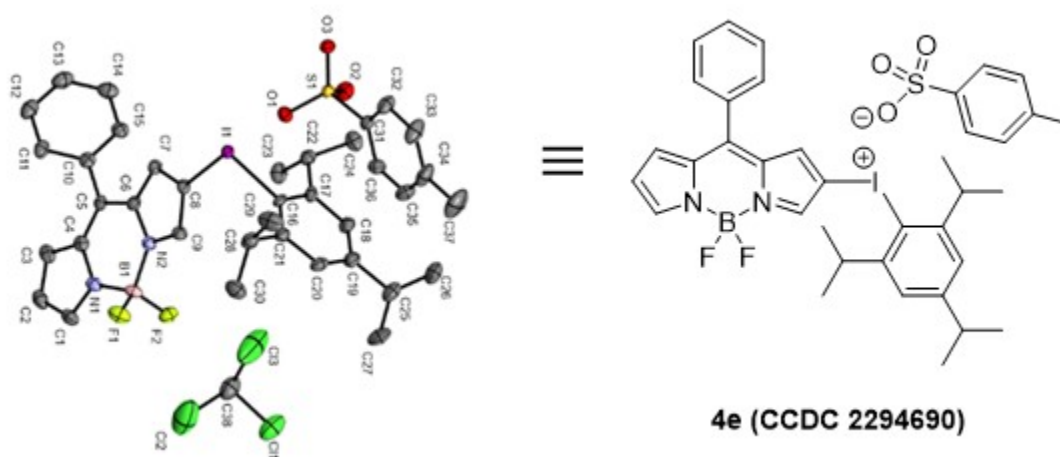

**Fig. S1:** The ORTEP diagram of compound (**4e**) (CCDC 2294690). (The thermal ellipsoid is drawn at the 50 % probability level.)

**Table S1 Crystal data and structure refinement for compound 4e (exp\_814\_C-H).**

|                       |                                                                                                  |
|-----------------------|--------------------------------------------------------------------------------------------------|
| Identification code   | <b>4e (exp_814_C-H)</b>                                                                          |
| Empirical formula     | C <sub>38</sub> H <sub>41</sub> BCl <sub>3</sub> F <sub>2</sub> IN <sub>2</sub> O <sub>3</sub> S |
| Formula weight        | 887.85                                                                                           |
| Temperature/K         | 93(2)                                                                                            |
| Crystal system        | triclinic                                                                                        |
| Space group           | P-1                                                                                              |
| a/Å                   | 8.40960(10)                                                                                      |
| b/Å                   | 14.7442(2)                                                                                       |
| c/Å                   | 17.5925(2)                                                                                       |
| α/°                   | 109.4650(10)                                                                                     |
| β/°                   | 94.5770(10)                                                                                      |
| γ/°                   | 105.5260(10)                                                                                     |
| Volume/Å <sup>3</sup> | 1947.03(4)                                                                                       |
| Z                     | 2                                                                                                |

|                                                |                                                               |
|------------------------------------------------|---------------------------------------------------------------|
| $\rho_{\text{calc}}/\text{g}/\text{cm}^3$      | 1.514                                                         |
| $\mu/\text{mm}^{-1}$                           | 9.258                                                         |
| F(000)                                         | 900.0                                                         |
| Crystal size/ $\text{mm}^3$                    | $0.15 \times 0.05 \times 0.03$                                |
| Radiation                                      | Cu K $\alpha$ ( $\lambda = 1.54184$ )                         |
| 2 $\Theta$ range for data collection/ $^\circ$ | 6.886 to 159.76                                               |
| Index ranges                                   | $-10 \leq h \leq 10, -18 \leq k \leq 13, -22 \leq l \leq 22$  |
| Reflections collected                          | 21257                                                         |
| Independent reflections                        | 8171 [ $R_{\text{int}} = 0.0381, R_{\text{sigma}} = 0.0414$ ] |
| Data/restraints/parameters                     | 8171/0/467                                                    |
| Goodness-of-fit on $F^2$                       | 1.114                                                         |
| Final R indexes [ $I \geq 2\sigma(I)$ ]        | $R_1 = 0.0429, wR_2 = 0.1170$                                 |
| Final R indexes [all data]                     | $R_1 = 0.0438, wR_2 = 0.1176$                                 |
| Largest diff. peak/hole / $e \text{ \AA}^{-3}$ | 2.86/-1.90                                                    |

**Table S2 Fractional Atomic Coordinates ( $\times 10^4$ ) and Equivalent Isotropic Displacement Parameters ( $\text{\AA}^2 \times 10^3$ ) for exp\_814\_C-H.  $U_{\text{eq}}$  is defined as 1/3 of of the trace of the orthogonalised  $U_{ij}$  tensor.**

| Atom | x           | y            | z           | U(eq)      |
|------|-------------|--------------|-------------|------------|
| II   | 4478.8 (2)  | 1753.9 (2)   | 5780.5 (2)  | 17.32 (8)  |
| S1   | 4606.3 (10) | -538.2 (6)   | 6307.9 (5)  | 18.82 (16) |
| Cl1  | 2035.2 (18) | 6551.9 (12)  | 9477.8 (7)  | 58.4 (3)   |
| Cl2  | 4557 (2)    | 7356.1 (19)  | 8674.5 (11) | 96.1 (7)   |
| Cl3  | 3581 (4)    | 5227 (2)     | 8460.0 (13) | 125.2 (11) |
| F2   | 2232 (3)    | 5537.0 (17)  | 6736.6 (13) | 28.1 (4)   |
| F1   | 4912 (3)    | 6117.7 (17)  | 6573.2 (15) | 31.6 (5)   |
| O3   | 5110 (3)    | -1386.1 (19) | 5812.0 (15) | 23.5 (5)   |
| O1   | 5490 (3)    | 404.5 (19)   | 6211.7 (16) | 26.7 (5)   |
| O2   | 2805 (3)    | -744 (2)     | 6208.8 (17) | 29.5 (6)   |
| N2   | 3320 (4)    | 4379 (2)     | 5757.6 (17) | 20.4 (5)   |
| N1   | 2678 (4)    | 5781 (2)     | 5471.8 (19) | 22.2 (6)   |
| C6   | 2701 (4)    | 3771 (3)     | 4940 (2)    | 19.9 (6)   |
| C31  | 5345 (4)    | -352 (3)     | 7339 (2)    | 21.8 (7)   |
| C5   | 1972 (4)    | 4126 (3)     | 4385 (2)    | 19.6 (6)   |
| C16  | 3778 (4)    | 2101 (3)     | 6955.3 (19) | 19.6 (6)   |
| C7   | 2993 (4)    | 2838 (3)     | 4795 (2)    | 19.8 (6)   |
| C1   | 2542 (4)    | 6687 (3)     | 5561 (3)    | 26.4 (7)   |
| C22  | 779 (4)     | 917 (3)      | 6241 (2)    | 23.7 (7)   |
| C4   | 1974 (4)    | 5126 (3)     | 4658 (2)    | 21.7 (6)   |
| C21  | 5015 (5)    | 2758 (3)     | 7646 (2)    | 23.2 (7)   |
| C18  | 1727 (5)    | 1802 (3)     | 7777 (2)    | 25.7 (7)   |
| C17  | 2124 (4)    | 1609 (3)     | 6990 (2)    | 20.5 (6)   |

|     |           |          |          |           |
|-----|-----------|----------|----------|-----------|
| C9  | 3977 (4)  | 3858 (3) | 6132 (2) | 20.4 (6)  |
| C10 | 1221 (4)  | 3435 (3) | 3532 (2) | 22.1 (7)  |
| C32 | 6328 (5)  | -896 (3) | 7524 (2) | 31.3 (8)  |
| C3  | 1361 (4)  | 5694 (3) | 4254 (2) | 26.1 (7)  |
| C2  | 1739 (5)  | 6662 (3) | 4818 (3) | 28.8 (8)  |
| C36 | 4976 (5)  | 383 (3)  | 7966 (2) | 31.0 (8)  |
| C24 | -503 (5)  | 71 (3)   | 6396 (3) | 30.2 (8)  |
| C15 | 103 (5)   | 2472 (3) | 3367 (2) | 25.9 (7)  |
| C8  | 3784 (4)  | 2904 (3) | 5548 (2) | 19.4 (6)  |
| C23 | -127 (5)  | 1532 (3) | 5915 (3) | 30.9 (8)  |
| C20 | 4524 (5)  | 2907 (3) | 8412 (2) | 26.8 (7)  |
| C19 | 2913 (5)  | 2429 (3) | 8487 (2) | 28.1 (8)  |
| C11 | 1602 (5)  | 3738 (3) | 2875 (2) | 25.5 (7)  |
| C12 | 862 (5)   | 3096 (3) | 2076 (2) | 33.0 (8)  |
| C33 | 6942 (6)  | -692 (4) | 8339 (3) | 41.6 (10) |
| C14 | -659 (5)  | 1837 (3) | 2571 (3) | 32.1 (8)  |
| C35 | 5603 (6)  | 574 (3)  | 8773 (2) | 38.4 (9)  |
| C28 | 6833 (5)  | 3251 (3) | 7625 (2) | 29.9 (8)  |
| B1  | 3325 (5)  | 5486 (3) | 6181 (3) | 22.6 (7)  |
| C13 | -277 (6)  | 2148 (3) | 1926 (2) | 36.1 (9)  |
| C25 | 2522 (6)  | 2608 (4) | 9343 (3) | 38.1 (9)  |
| C34 | 6589 (6)  | 36 (4)   | 8970 (2) | 40.5 (10) |
| C29 | 7918 (5)  | 2660 (4) | 7830 (3) | 44.2 (11) |
| C30 | 7521 (6)  | 4363 (3) | 8192 (3) | 40.1 (10) |
| C38 | 2929 (7)  | 6273 (4) | 8590 (3) | 45.6 (11) |
| C27 | 2159 (9)  | 3604 (4) | 9699 (3) | 58.1 (15) |
| C37 | 7269 (8)  | 245 (6)  | 9856 (3) | 63.0 (17) |
| C26 | 1121 (10) | 1754 (5) | 9396 (3) | 70 (2)    |

**Table S3 Anisotropic Displacement Parameters ( $\text{\AA}^2 \times 10^3$ ) for exp\_814\_C-H. The Anisotropic displacement factor exponent takes the form:  $-2\pi^2[h^2a^2U_{11}+2hka^*b^*U_{12}+\dots]$ .**

| Atom | $U_{11}$   | $U_{22}$   | $U_{33}$   | $U_{23}$  | $U_{13}$  | $U_{12}$   |
|------|------------|------------|------------|-----------|-----------|------------|
| I1   | 20.68 (12) | 18.18 (12) | 16.13 (12) | 7.42 (8)  | 5.65 (7)  | 8.87 (8)   |
| S1   | 22.3 (4)   | 19.8 (4)   | 17.5 (3)   | 7.4 (3)   | 6.0 (3)   | 10.3 (3)   |
| Cl1  | 61.5 (8)   | 82.8 (10)  | 34.1 (6)   | 18.9 (6)  | 12.0 (5)  | 30.0 (7)   |
| Cl2  | 72.7 (11)  | 125.6 (17) | 58.6 (9)   | 33.3 (10) | 7.0 (8)   | -16.2 (11) |
| Cl3  | 237 (3)    | 162 (2)    | 83.7 (13)  | 83.3 (15) | 89.0 (17) | 166 (2)    |
| F2   | 30.5 (11)  | 30.7 (11)  | 24.6 (10)  | 6.8 (9)   | 6.9 (8)   | 16.0 (9)   |
| F1   | 22.6 (10)  | 24.8 (11)  | 40.0 (13)  | 6.1 (9)   | -5.1 (9)  | 6.1 (8)    |
| O3   | 32.1 (13)  | 21.3 (12)  | 20.0 (11)  | 7.1 (9)   | 8.1 (10)  | 12.5 (10)  |
| O1   | 35.5 (14)  | 22.6 (12)  | 28.7 (13)  | 13.4 (10) | 10.6 (11) | 13.4 (11)  |
| O2   | 23.5 (12)  | 37.0 (15)  | 28.9 (13)  | 11.7 (11) | 4.8 (10)  | 11.7 (11)  |

|     |           |           |           |           |           |           |
|-----|-----------|-----------|-----------|-----------|-----------|-----------|
| N2  | 24.3 (14) | 19.2 (14) | 18.8 (13) | 6.9 (11)  | 3.7 (11)  | 8.7 (11)  |
| N1  | 20.6 (13) | 20.1 (14) | 26.7 (15) | 7.6 (11)  | 5.6 (11)  | 8.6 (11)  |
| C6  | 21.7 (15) | 23.0 (16) | 18.4 (15) | 8.4 (13)  | 6.4 (12)  | 10.4 (13) |
| C31 | 24.4 (16) | 24.7 (17) | 18.9 (15) | 9.6 (13)  | 8.2 (13)  | 8.7 (13)  |
| C5  | 18.4 (15) | 22.2 (16) | 20.1 (15) | 9.5 (13)  | 6.0 (12)  | 6.8 (12)  |
| C16 | 27.6 (17) | 22.6 (16) | 11.5 (14) | 5.6 (12)  | 7.0 (12)  | 12.3 (13) |
| C7  | 22.9 (16) | 21.8 (16) | 18.3 (15) | 8.9 (12)  | 3.9 (12)  | 10.7 (13) |
| C1  | 21.9 (16) | 18.0 (16) | 39 (2)    | 9.1 (14)  | 7.4 (14)  | 6.5 (13)  |
| C22 | 24.2 (16) | 26.0 (17) | 22.7 (16) | 8.7 (14)  | 6.1 (13)  | 10.8 (14) |
| C4  | 18.2 (15) | 24.2 (17) | 24.5 (16) | 10.5 (13) | 4.2 (12)  | 7.2 (13)  |
| C21 | 29.4 (18) | 22.8 (16) | 17.4 (15) | 6.2 (13)  | 4.0 (13)  | 9.6 (14)  |
| C18 | 26.5 (17) | 29.0 (18) | 25.8 (17) | 10.6 (14) | 11.6 (14) | 12.9 (14) |
| C17 | 22.5 (16) | 25.0 (16) | 22.4 (16) | 13.8 (13) | 10.7 (13) | 12.6 (13) |
| C9  | 22.7 (16) | 19.8 (16) | 21.6 (16) | 7.6 (13)  | 5.2 (12)  | 11.0 (13) |
| C10 | 21.0 (16) | 26.0 (17) | 23.2 (16) | 10.1 (14) | 4.4 (13)  | 12.1 (13) |
| C32 | 37 (2)    | 43 (2)    | 22.9 (18) | 15.4 (16) | 9.9 (15)  | 22.2 (18) |
| C3  | 20.9 (16) | 27.9 (18) | 36.2 (19) | 17.3 (15) | 7.7 (14)  | 10.8 (14) |
| C2  | 26.5 (18) | 25.6 (18) | 42 (2)    | 18.8 (16) | 10.6 (16) | 11.5 (14) |
| C36 | 42 (2)    | 24.1 (18) | 26.1 (18) | 6.4 (15)  | 8.6 (16)  | 12.3 (16) |
| C24 | 22.9 (17) | 31.2 (19) | 39 (2)    | 16.2 (16) | 5.0 (15)  | 7.8 (15)  |
| C15 | 26.3 (17) | 25.0 (18) | 29.3 (18) | 9.9 (14)  | 6.4 (14)  | 12.6 (14) |
| C8  | 23.1 (16) | 21.2 (16) | 21.4 (15) | 11.7 (13) | 7.2 (12)  | 13.2 (13) |
| C23 | 26.1 (18) | 40 (2)    | 35 (2)    | 21.2 (17) | 5.6 (15)  | 13.6 (16) |
| C20 | 33.7 (19) | 28.4 (18) | 15.8 (15) | 3.0 (13)  | 3.7 (14)  | 12.6 (15) |
| C19 | 37 (2)    | 29.3 (19) | 23.8 (17) | 10.1 (14) | 11.7 (15) | 16.8 (16) |
| C11 | 26.5 (17) | 32.9 (19) | 24.0 (17) | 15.1 (15) | 5.1 (14)  | 14.1 (15) |
| C12 | 35 (2)    | 44 (2)    | 26.2 (19) | 16.4 (17) | 6.4 (16)  | 18.3 (18) |
| C33 | 37 (2)    | 70 (3)    | 31 (2)    | 27 (2)    | 8.3 (17)  | 27 (2)    |
| C14 | 29.2 (19) | 27.9 (19) | 33 (2)    | 5.3 (16)  | -1.2 (15) | 9.1 (15)  |
| C35 | 52 (3)    | 34 (2)    | 21.5 (18) | 3.6 (16)  | 9.5 (17)  | 10.0 (19) |
| C28 | 28.0 (18) | 33 (2)    | 22.0 (17) | 5.3 (15)  | 4.4 (14)  | 5.3 (15)  |
| B1  | 21.2 (18) | 17.4 (17) | 27.9 (19) | 4.9 (15)  | 3.1 (15)  | 8.8 (14)  |
| C13 | 40 (2)    | 40 (2)    | 23.4 (18) | 5.2 (16)  | -2.5 (16) | 15.6 (18) |
| C25 | 45 (2)    | 48 (3)    | 24.0 (19) | 12.9 (18) | 13.7 (17) | 18 (2)    |
| C34 | 35 (2)    | 61 (3)    | 18.9 (18) | 14.9 (18) | 3.4 (16)  | 6 (2)     |
| C29 | 26 (2)    | 34 (2)    | 63 (3)    | 6 (2)     | 8.6 (19)  | 9.1 (17)  |
| C30 | 39 (2)    | 27 (2)    | 44 (2)    | 8.5 (18)  | 1.7 (19)  | 1.8 (17)  |
| C38 | 49 (3)    | 61 (3)    | 34 (2)    | 22 (2)    | 10 (2)    | 23 (2)    |
| C27 | 85 (4)    | 50 (3)    | 40 (3)    | 7 (2)     | 37 (3)    | 28 (3)    |
| C37 | 54 (3)    | 101 (5)   | 24 (2)    | 24 (3)    | -3 (2)    | 12 (3)    |
| C26 | 118 (6)   | 52 (3)    | 37 (3)    | 18 (2)    | 39 (3)    | 10 (3)    |

**Table S4 Bond Lengths for exp\_814\_C-H.**

| Atom | Atom | Length/Å  | Atom | Atom | Length/Å  |
|------|------|-----------|------|------|-----------|
| I1   | C16  | 2.129 (3) | C22  | C17  | 1.519 (5) |
| I1   | C8   | 2.084 (3) | C22  | C24  | 1.532 (5) |
| S1   | O3   | 1.456 (2) | C22  | C23  | 1.541 (5) |
| S1   | O1   | 1.462 (3) | C4   | C3   | 1.427 (5) |
| S1   | O2   | 1.447 (3) | C21  | C20  | 1.405 (5) |
| S1   | C31  | 1.774 (4) | C21  | C28  | 1.517 (5) |
| Cl1  | C38  | 1.760 (5) | C18  | C17  | 1.404 (5) |
| Cl2  | C38  | 1.757 (6) | C18  | C19  | 1.396 (6) |
| Cl3  | C38  | 1.723 (6) | C9   | C8   | 1.395 (5) |
| F2   | B1   | 1.392 (5) | C10  | C15  | 1.396 (5) |
| F1   | B1   | 1.372 (4) | C10  | C11  | 1.402 (5) |
| N2   | C6   | 1.384 (4) | C32  | C33  | 1.386 (6) |
| N2   | C9   | 1.356 (4) | C3   | C2   | 1.374 (6) |
| N2   | B1   | 1.550 (5) | C36  | C35  | 1.382 (6) |
| N1   | C1   | 1.329 (5) | C15  | C14  | 1.382 (5) |
| N1   | C4   | 1.404 (5) | C20  | C19  | 1.389 (6) |
| N1   | B1   | 1.556 (5) | C19  | C25  | 1.518 (5) |
| C6   | C5   | 1.422 (5) | C11  | C12  | 1.385 (6) |
| C6   | C7   | 1.405 (5) | C12  | C13  | 1.392 (6) |
| C31  | C32  | 1.386 (5) | C33  | C34  | 1.379 (7) |
| C31  | C36  | 1.388 (5) | C14  | C13  | 1.389 (6) |
| C5   | C4   | 1.390 (5) | C35  | C34  | 1.387 (7) |
| C5   | C10  | 1.474 (5) | C28  | C29  | 1.518 (6) |
| C16  | C21  | 1.404 (5) | C28  | C30  | 1.526 (6) |
| C16  | C17  | 1.403 (5) | C25  | C27  | 1.517 (7) |
| C7   | C8   | 1.394 (5) | C25  | C26  | 1.511 (8) |
| C1   | C2   | 1.408 (6) | C34  | C37  | 1.516 (6) |

**Table S5 Bond Angles for exp\_814\_C-H.**

| Atom | Atom | Atom | Angle/°     | Atom | Atom | Atom | Angle/°   |
|------|------|------|-------------|------|------|------|-----------|
| C8   | I1   | C16  | 93.99 (13)  | N2   | C9   | C8   | 108.1 (3) |
| O3   | S1   | O1   | 111.88 (15) | C15  | C10  | C5   | 120.5 (3) |
| O3   | S1   | C31  | 104.98 (16) | C15  | C10  | C11  | 119.0 (3) |
| O1   | S1   | C31  | 105.04 (16) | C11  | C10  | C5   | 120.5 (3) |
| O2   | S1   | O3   | 113.61 (16) | C31  | C32  | C33  | 119.3 (4) |
| O2   | S1   | O1   | 113.41 (16) | C2   | C3   | C4   | 107.0 (3) |
| O2   | S1   | C31  | 107.04 (16) | C3   | C2   | C1   | 107.5 (3) |
| C6   | N2   | B1   | 126.4 (3)   | C35  | C36  | C31  | 119.8 (4) |
| C9   | N2   | C6   | 108.7 (3)   | C14  | C15  | C10  | 120.8 (4) |



|     |     |     |          |     |     |     |          |
|-----|-----|-----|----------|-----|-----|-----|----------|
| C9  | N2  | B1  | 124.9(3) | C7  | C8  | I1  | 125.9(3) |
| C1  | N1  | C4  | 108.2(3) | C7  | C8  | C9  | 108.8(3) |
| C1  | N1  | B1  | 124.9(3) | C9  | C8  | I1  | 125.2(2) |
| C4  | N1  | B1  | 126.6(3) | C19 | C20 | C21 | 122.2(3) |
| N2  | C6  | C5  | 121.5(3) | C18 | C19 | C25 | 122.7(4) |
| N2  | C6  | C7  | 108.6(3) | C20 | C19 | C18 | 118.9(3) |
| C7  | C6  | C5  | 129.8(3) | C20 | C19 | C25 | 118.3(4) |
| C32 | C31 | S1  | 121.3(3) | C12 | C11 | C10 | 120.3(4) |
| C32 | C31 | C36 | 119.9(3) | C11 | C12 | C13 | 119.7(4) |
| C36 | C31 | S1  | 118.7(3) | C34 | C33 | C32 | 121.5(4) |
| C6  | C5  | C10 | 120.0(3) | C15 | C14 | C13 | 119.7(4) |
| C4  | C5  | C6  | 119.2(3) | C36 | C35 | C34 | 121.0(4) |
| C4  | C5  | C10 | 120.9(3) | C21 | C28 | C29 | 110.0(3) |
| C21 | C16 | I1  | 118.3(2) | C21 | C28 | C30 | 113.2(3) |
| C17 | C16 | I1  | 117.4(2) | C29 | C28 | C30 | 110.3(4) |
| C17 | C16 | C21 | 124.2(3) | F2  | B1  | N2  | 110.4(3) |
| C8  | C7  | C6  | 105.8(3) | F2  | B1  | N1  | 109.6(3) |
| N1  | C1  | C2  | 110.1(3) | F1  | B1  | F2  | 110.0(3) |
| C17 | C22 | C24 | 113.2(3) | F1  | B1  | N2  | 111.2(3) |
| C17 | C22 | C23 | 110.8(3) | F1  | B1  | N1  | 110.6(3) |
| C24 | C22 | C23 | 110.1(3) | N2  | B1  | N1  | 104.9(3) |
| N1  | C4  | C3  | 107.2(3) | C14 | C13 | C12 | 120.5(4) |
| C5  | C4  | N1  | 120.7(3) | C27 | C25 | C19 | 111.4(4) |
| C5  | C4  | C3  | 132.1(3) | C26 | C25 | C19 | 114.1(4) |
| C16 | C21 | C20 | 116.2(3) | C26 | C25 | C27 | 110.2(5) |
| C16 | C21 | C28 | 125.0(3) | C33 | C34 | C35 | 118.5(4) |
| C20 | C21 | C28 | 118.6(3) | C33 | C34 | C37 | 120.7(5) |
| C19 | C18 | C17 | 122.2(3) | C35 | C34 | C37 | 120.9(5) |
| C16 | C17 | C22 | 124.1(3) | C12 | C38 | C11 | 108.5(3) |
| C16 | C17 | C18 | 116.2(3) | C13 | C38 | C11 | 109.7(3) |
| C18 | C17 | C22 | 119.7(3) | C13 | C38 | C12 | 113.4(3) |

**Table S6 Hydrogen Atom Coordinates ( $\text{\AA}\times 10^4$ ) and Isotropic Displacement Parameters ( $\text{\AA}^2\times 10^3$ ) for exp\_814\_C-H.**

| Atom | x       | y        | z       | U(eq) |
|------|---------|----------|---------|-------|
| H7   | 2710.24 | 2278.01  | 4288.86 | 24    |
| H1   | 2932.03 | 7266.68  | 6054.85 | 32    |
| H22  | 1353.36 | 588.77   | 5801.44 | 28    |
| H18  | 614.25  | 1494.42  | 7828.14 | 31    |
| H9   | 4481.06 | 4098.94  | 6694.32 | 24    |
| H32  | 6577.88 | -1404.33 | 7098.14 | 38    |
| H3   | 799.33  | 5447.98  | 3700.88 | 31    |

|      |          |          |          |     |
|------|----------|----------|----------|-----|
| H2   | 1500.5   | 7214.68  | 4723.96  | 35  |
| H36  | 4293.68  | 752.44   | 7840.54  | 37  |
| H24A | 87.42    | -295.37  | 6626.48  | 45  |
| H24B | -1249.64 | -398.55  | 5877.73  | 45  |
| H24C | -1168.06 | 366.25   | 6783.98  | 45  |
| H15  | -137.33  | 2251.69  | 3806.36  | 31  |
| H23A | -737.61  | 1843.68  | 6325.58  | 46  |
| H23B | -921.05  | 1080.5   | 5406.03  | 46  |
| H23C | 700.87   | 2061.72  | 5807.36  | 46  |
| H20  | 5321.49  | 3350.44  | 8895.21  | 32  |
| H11  | 2371.26  | 4387.97  | 2978.32  | 31  |
| H12  | 1129.9   | 3301.28  | 1631.44  | 40  |
| H33  | 7622.03  | -1061.92 | 8465.75  | 50  |
| H14  | -1440.91 | 1190.53  | 2465.72  | 38  |
| H35  | 5354.9   | 1082.17  | 9200.72  | 46  |
| H28  | 6897.65  | 3216.25  | 7050.96  | 36  |
| H13  | -795.94  | 1710.68  | 1378.05  | 43  |
| H25  | 3558.15  | 2663.03  | 9699.67  | 46  |
| H29A | 7889.91  | 2687.84  | 8393.14  | 66  |
| H29B | 9077.62  | 2957.66  | 7780.79  | 66  |
| H29C | 7488.11  | 1952.96  | 7449.22  | 66  |
| H30A | 6775.71  | 4727.63  | 8072.69  | 60  |
| H30B | 8646.22  | 4660.22  | 8102.47  | 60  |
| H30C | 7581.12  | 4414.21  | 8763.79  | 60  |
| H38  | 2047.62  | 6109.23  | 8106.27  | 55  |
| H27A | 3109.73  | 4157.09  | 9694.8   | 87  |
| H27B | 1991.95  | 3719.72  | 10264.62 | 87  |
| H27C | 1142.42  | 3578.3   | 9368.42  | 87  |
| H37A | 6888.67  | -378.96  | 9967.25  | 95  |
| H37B | 6858.62  | 763.32   | 10218.3  | 95  |
| H37C | 8499.33  | 486.82   | 9955.48  | 95  |
| H26A | 55.87    | 1719.39  | 9098.85  | 106 |
| H26B | 1043.3   | 1877.97  | 9972.86  | 106 |
| H26C | 1353.45  | 1112.65  | 9151.3   | 106 |

### Refinement model description

Number of restraints - 0, number of constraints - unknown.

#### Details:

1. Fixed Uiso

At 1.2 times of:

All C(H) groups

At 1.5 times of:

All C(H,H,H) groups

2.a Ternary CH refined with riding coordinates:

C22 (H22), C28 (H28), C25 (H25), C38 (H38)  
 2.b Aromatic/amide H refined with riding coordinates:  
 C7 (H7), C1 (H1), C18 (H18), C9 (H9), C32 (H32), C3 (H3), C2 (H2), C36 (H36),  
 C15 (H15), C20 (H20), C11 (H11), C12 (H12), C33 (H33), C14 (H14), C35 (H35), C13 (H13)  
 2.c Idealised Me refined as rotating group:  
 C24 (H24A,H24B,H24C), C23 (H23A,H23B,H23C), C29 (H29A,H29B,H29C), C30 (H30A,H30B,  
 H30C), C27 (H27A,H27B,H27C), C37 (H37A,H37B,H37C), C26 (H26A,H26B,H26C)

### III. General experimental procedure

#### General procedure for the synthesis of Bodipy(aryl)iodonium salts 4a-g:

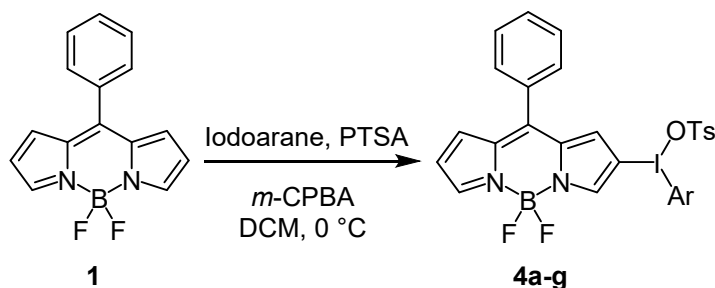

To a stirred solution of iodoarenes (0.37 mmol) in dichloromethane (2 mL) at 0 °C was added *m*-CPBA (0.45 mmol) and PTSA (0.45 mmol). The resulting suspension was allowed to stir at 0 °C for 20 min and then a solution of BODIPY **1** (0.1 g, 0.37 mmol) in dichloromethane (1 mL) was added dropwise to the reaction mixture and continued the stirring at 0 °C for 2 h. The progress of the reaction was monitored by TLC. After completion of the reaction, removed the excess of solvent at low temperature. The residue so obtained was taken into in cold diethyl ether and stirred at 0 °C for 20 min. The solid product was filtered, washed with cold diethyl ether and dried under vacuum to obtain yellowish solid products **4a-g**.

#### 5,5-difluoro-10-phenyl-5*H*-4λ<sup>4</sup>,5λ<sup>4</sup>-dipyrrolo[1,2-*c*:2',1'-*f*][1,3,2]diazaborin-2-yl)-(mesityl)iodonium 4-methylbenzenesulfonate (**4a**):

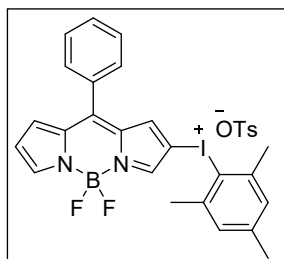

Yellow colour, 93% yield, M.pt- 247-248 °C; <sup>1</sup>H NMR (400 MHz, DMSO-*d*<sub>6</sub>) δ 8.57 (s, 2H), 7.77 – 7.71 (m, 1H), 7.64 (d, *J* = 3.9 Hz, 4H), 7.49 – 7.42 (m, 3H), 7.30 – 7.24 (d, *J* = 3.4 Hz, 1H), 7.16 (s, 2H), 7.10 (d, *J* = 7.5 Hz, 2H), 6.92 (d, *J* = 2.9 Hz, 1H), 2.63 (s, 6H), 2.27 (s, 6H); <sup>13</sup>C NMR (100 MHz, DMSO-*d*<sub>6</sub>) δ 152.2, 147.9, 146.0, 144.2, 143.2, 141.7, 138.1, 136.7, 134.3, 133.2, 132.6, 132.2, 131.2, 130.0, 129.4, 128.5, 125.9, 124.2, 123.5, 92.2, 65.4, 26.9,

21.2, 20.93 15.6.  $^{19}\text{F}$  NMR (376 MHz,  $\text{DMSO-}d_6$ )  $\delta$  -141.2 (dd,  $J = 56.5, 28.1$  Hz); HRMS (ESI)  $m/z$  calcd for  $\text{C}_{24}\text{H}_{21}\text{BF}_2\text{IN}_2$   $[\text{M}]^+$  513.0797; found 513.0809.

**(5,5-difluoro-10-phenyl-5*H*-4 $\lambda^4$ ,5 $\lambda^4$ -dipyrrolo[1,2-*c*:2',1'-*f*][1,3,2]diazaborinin-2-yl)(phenyl)iodonium 4-methylbenzenesulfonate (4b):**

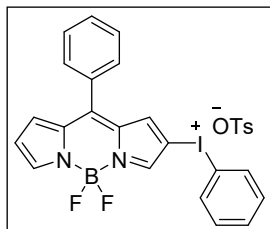

Yellow colour, 89% yield, M.pt- 207-208 °C;  $^1\text{H}$  NMR (400 MHz,  $\text{DMSO-}d_6$ )  $\delta$  8.62 (s, 1H), 8.54 (s, 1H), 8.18 (d,  $J = 7.8$  Hz, 2H), 7.74 (dq,  $J = 8.1, 4.0$  Hz, 1H), 7.66 (d,  $J = 4.3$  Hz, 4H), 7.62 – 7.56 (m, 2H), 7.52 – 7.46 (m, 4H), 7.28 (d,  $J = 4.2$  Hz, 1H), 7.12 (d,  $J = 7.8$  Hz, 2H), 6.91 (d,  $J = 4.0$  Hz, 1H), 2.29 (s, 3H).  $^{13}\text{C}$  NMR (100 MHz,  $\text{DMSO-}d_6$ )  $\delta$  151.83, 148.02, 146.14, 144.56, 138.11, 136.49, 136.46, 135.04, 133.78, 133.76, 132.67, 132.24, 131.96, 131.90, 131.23, 129.43, 128.53, 125.96, 123.26, 123.24, 119.86, 21.25.; HRMS (ESI)  $m/z$  calcd for  $\text{C}_{21}\text{H}_{15}\text{BF}_2\text{IN}_2$   $[\text{M}]^+$  471.0345; found 471.0339.

**(5,5-difluoro-1,3,7,9-tetramethyl-10-phenyl-5*H*-4 $\lambda^4$ ,5 $\lambda^4$ -dipyrrolo[1,2-*c*:2',1'-*f*][1,3,2]-diazaborinin-2-yl)(phenyl)iodonium 4-methyl-benzenesulfonate (4c):**

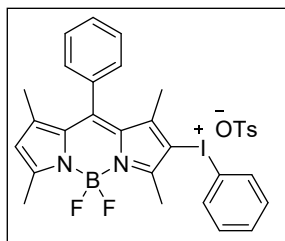

Yellow colour, 83% yield, M.pt- 131-134 °C;  $^1\text{H}$  NMR (400 MHz,  $\text{DMSO-}d_6$ )  $\delta$   $^1\text{H}$  NMR (400 MHz,  $\text{DMSO-}d_6$ )  $\delta$  8.09 (d,  $J = 7.9$  Hz, 2H), 7.61 (bs, 3H), 7.49 (m, 5H), 7.49 (m, 2H), 7.12 (d,  $J = 7.7$  Hz, 2H), 6.50 (s, 1H), 2.71 (s, 3H), 2.56 (s, 3H), 2.28 (s, 3H), 1.50 (s, 3H), 1.39 (s, 3H).  $^{13}\text{C}$  NMR (100 MHz,  $\text{DMSO-}d_6$ )  $\delta$  164.5, 151.7, 149.1, 146.2, 143.1, 140.6, 138.0, 135.0, 134.2, 133.4, 132.4, 132.3, 130.3, 130.1, 129.3, 128.5, 128.1, 125.9, 125.6, 117.3, 102.9, 21.2, 15.4, 15.2, 15.0, 14.9;  $^{19}\text{F}$  NMR (376 MHz,  $\text{DMSO-}d_6$ )  $\delta$   $^{19}\text{F}$  NMR (376 MHz,  $\text{DMSO}$ )  $\delta$  -142.89, -142.98, -143.07, -143.15. (dd,  $J = 64.4, 31.7$  Hz); HRMS (ESI)  $m/z$  calcd for  $\text{C}_{25}\text{H}_{23}\text{BF}_2\text{IN}_2$   $[\text{M}]^+$  527.0965; found 527.0966.

**(5,5-difluoro-1,3,7,9-tetramethyl-10-phenyl-5*H*-4 $\lambda^4$ ,5 $\lambda^4$ -dipyrrolo[1,2-*c*:2',1'-*f*][1,3,2]-diazaborinin-2-yl)(mesityl)iodonium (4d):**

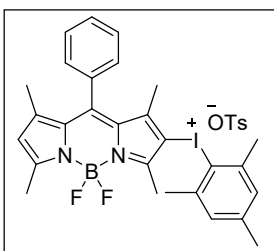

Yellow colour, 69% yield, M.pt- 150-153 °C;  $^1\text{H}$  NMR (400 MHz,  $\text{DMSO-}d_6$ )  $\delta$  7.60 (s, 3H), 7.46 (d,  $J = 7.2$  Hz, 2H), 7.40 (s, 2H), 7.17 (s, 2H), 7.10 (d,  $J = 7.0$  Hz, 2H), 6.50 (s, 1H), 2.57 (d,  $J = 8.7$  Hz, 6H), 2.52 (s, 6H), 2.28 (s, 6H), 1.38 (d,  $J = 6.3$  Hz, 6H);  $^{13}\text{C}$  NMR (100 MHz,  $\text{DMSO-}d_6$ )  $\delta$  164.4, 151.6, 149.1, 146.1, 143.1, 143.0, 141.7, 140.6, 138.0, 134.2, 133.4, 130.4, 130.3, 130.1, 128.5, 128.1, 125.9, 125.6, 121.4, 99.6, 26.3, 21.2, 20.9, 15.4, 15.1, 14.9;  $^{19}\text{F}$  NMR

(376 MHz, DMSO- $d_6$ )  $\delta$  -143.0 (dd,  $J$  = 64.4, 31.7 Hz); HRMS (ESI)  $m/z$  calcd for  $C_{28}H_{29}BF_2IN_2$   $[M]^+$  569.1438; found 569.1436.

**(5,5-difluoro-10-phenyl-5H-4 $\lambda^4$ ,5 $\lambda^4$ -dipyrrolo[1,2-c:2',1'-f][1,3,2]diazaborinin-2-yl)-(2,4,6-triisopropylphenyl)iodonium-4-methylbenzenesulfonate (4e):**

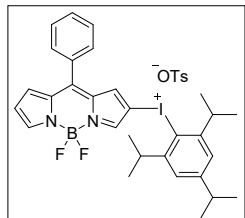

Yellow colour, 81% yield, M.pt- 287-288 °C;  $^1H$  NMR (400 MHz, DMSO- $d_6$ )  $\delta$  8.58 (s, 1H), 8.51 (s, 1H), 7.73 (t,  $J$  = 6.2 Hz, 1H), 7.66 – 7.59 (m, 4H), 7.48 (d,  $J$  = 7.7 Hz, 2H), 7.28 (dd,  $J$  = 27.9, 10.4 Hz, 4H), 7.11 (d,  $J$  = 7.6 Hz, 2H), 6.93 (d,  $J$  = 3.5 Hz, 1H), 3.50 (dt,  $J$  = 12.6, 6.2 Hz, 2H), 2.95 (dt,  $J$  = 13.7, 6.7 Hz, 1H), 2.29 (s, 3H), 1.24 (d,  $J$  = 6.0 Hz, 12H), 1.19 (d,  $J$  = 6.8 Hz, 6H);  $^{13}C$  NMR (100 MHz, DMSO- $d_6$ )  $\delta$  154.5, 152.6, 151.1, 147.8, 146.2, 143.5, 138.1, 136.8, 134.4, 132.5, 132.4, 132.2, 131.2, 129.3, 128.5, 125.9, 125.7, 124.8, 123.6, 123.6, 92.8, 40.0, 38.9, 33.8, 24.4, 24.0, 21.2;  $^{19}F$  NMR (376 MHz, DMSO- $d_6$ )  $\delta$  -141.3 (dd,  $J$  = 56.8, 28.3 Hz); HRMS (ESI)  $m/z$  calcd for  $C_{30}H_{33}BF_2IN_2$   $[M]^+$  597.1685; found 597.1749.

**(5,5-difluoro-10-phenyl-5H-4 $\lambda^4$ ,5 $\lambda^4$ -dipyrrolo[1,2-c:2',1'-f][1,3,2]diazaborinin-2-yl)(4-methoxyphenyl)iodonium-4-methylbenzenesulfonate (4f):**

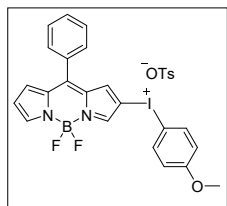

Yellow colour, 80% yield, M.pt- 242-245 °C;  $^1H$  NMR (400 MHz, DMSO- $d_6$ )  $\delta$  8.62 (s, 1H), 8.54 (s, 1H), 8.12 (d,  $J$  = 8.64 Hz, 1H), 7.75 – 7.65 (m, 5H), 7.57 (s, 1H), 7.49 (d,  $J$  = 7.72 Hz, 2H), 7.29 (d,  $J$  = 4.52 Hz, 1H), 7.13 (d,  $J$  = 7.76 Hz, 2H), 7.05 (d,  $J$  = 8.2 Hz, 2H), 6.92 (d,  $J$  = 4.6 Hz, 1H), 3.77 (s, 3H), 2.28 (s, 3H);  $^{13}C$  NMR (100 MHz, DMSO- $d_6$ )  $\delta$  162.3, 152.3, 148.0, 145.6, 144.1, 138.4, 137.2, 136.7, 133.3, 132.5, 132.3, 131.2, 129.5, 128.6, 125.9, 123.6, 117.8, 107.1, 56.1, 21.2;  $^{19}F$  NMR (376 MHz, DMSO- $d_6$ )  $\delta$  -141.3 (dd,  $J$  = 56.6, 28.1 Hz); HRMS (ESI)  $m/z$  calcd for  $C_{22}H_{17}BF_2IN_2O$   $[M]^+$  501.0442; found 501.0430.

**(5,5-difluoro-10-(4-methoxyphenyl)-5H-4 $\lambda^4$ ,5 $\lambda^4$ -dipyrrolo[1,2-c:2',1'-f][1,3,2]diazaborinin-2-yl)(mesityl)iodonium-4-methylbenzenesulfonate (4g):**

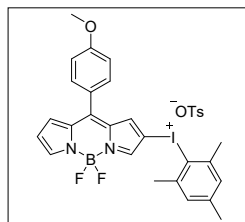

Yellow colour, 65% yield, M.pt- 283-286 °C;  $^1H$  NMR (400 MHz, DMSO- $d_6$ )  $\delta$  8.56 (s, 1H), 8.49 (s, 1H), 7.66 (d,  $J$  = 8.48 Hz, 2H), 7.49 – 7.46 (m, 3H), 7.32 (d,  $J$  = 4.5 Hz, 1H), 7.22-7.17 (m, 4H), 7.12 (d,  $J$  = 7.7 Hz, 2H), 6.91 (d,  $J$  = 4.5 Hz, 1H), 3.90 (s, 3H), 2.63 (s, 6H), 2.28 (s, 6H);  $^{13}C$  NMR (100 MHz, DMSO- $d_6$ )  $\delta$  154.5,

152.6, 151.1, 147.8, 146.2, 143.5, 138.1, 136.8, 134.4, 132.5, 132.4, 132.2, 131.2, 129.3, 128.5, 125.9, 125.7, 124.8, 123.6, 123.6, 92.8, 40.0, 38.9, 33.8, 24.4, 24.0, 21.2;  $^{19}\text{F}$  NMR (376 MHz,  $\text{DMSO-}d_6$ )  $\delta$  -143.2 (dd,  $J = 55.7, 27.6$  Hz); HRMS (ESI)  $m/z$  calcd for  $\text{C}_{25}\text{H}_{23}\text{BF}_2\text{IN}_2\text{O}$   $[\text{M}]^+$  543.0911; found 543.0927.

### General experimental procedure

To a stirred solution of **4a** (100 mg, 0.42 mmol) in acetonitrile (5 mL), appropriate nucleophiles (0.48 mmol) and cesium carbonate (1.20 mmol) were added and stirred the contents at room temperature for 1-2 h. Upon completion of the reaction, water (25 mL) was added, and extracted the mixture with dichloromethane ( $3 \times 25$  mL). The organic phase was dried over anhydrous sodium sulphate and concentrated under reduced pressure. Purification by column chromatography (chloroform and hexane 70:30) afforded the desired products **5a-c**.

### 5,5-difluoro-10-phenyl-2-thiocyanato-5*H*-4 $\lambda^4$ ,5 $\lambda^4$ -dipyrrolo[1,2-*c*:2',1'-*f*][1,3,2]diazaborinine **5a**:

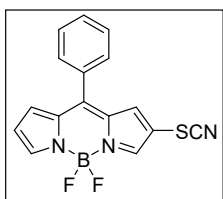

#### borinine **5a**:

Orange colour, 72% yield, M.pt- 212-214 °C;  $^1\text{H}$  NMR (400 MHz,  $\text{DMSO-}d_6$ )  $\delta$  8.62 (s, 1H), 8.54 (s, 1H), 8.06 (d,  $J = 8.3$  Hz, 2H), 7.74 (dd,  $J = 9.0, 4.5$  Hz, 1H), 7.66 (d,  $J = 4.4$  Hz, 4H), 7.56 (s, 1H), 7.32 – 7.27 (m, 3H), 6.91 (d,  $J = 5.8$  Hz, 1H), 2.32 (s, 3H);  $^{13}\text{C}$  NMR (100 MHz,  $\text{DMSO-}d_6$ )  $\delta$  151.8, 148.0, 144.5, 142.4, 136.6, 136.5, 135.0, 134.3, 133.6, 132.7, 132.5, 132.2, 131.2, 131.1, 131.1, 129.4, 129.3, 129.3, 128.4, 123.3, 123.2, 116.1, 96.7, 21.3; HRMS (ESI)  $m/z$  calcd for  $\text{C}_{16}\text{H}_{10}\text{BF}_2\text{N}_3\text{S}$   $[\text{M}+\text{H}]^+$  306.0667; found 306.0670.

### 5,5-difluoro-1,3,7,9-tetramethyl-10-phenyl-2-thiocyanato-5*H*-4 $\lambda^4$ ,5 $\lambda^4$ -dipyrrolo[1,2-*c*:2',1'-*f*][1,3,2]diazaborinine **5b**:

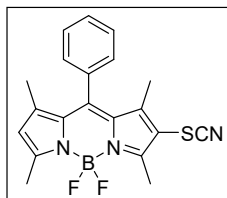

#### diazaborinine **5b**:

Orange colour, 81% yield, M.pt- 176-178 °C;  $^1\text{H}$  NMR (400 MHz,  $\text{DMSO-}d_6$ )  $\delta$  8.68 (s, 3H), 8.58 (s, 3H), 8.20 (d,  $J = 7.9$  Hz, 6H), 7.66 (dd,  $J = 10.4, 5.9$  Hz, 18H), 7.53 (t,  $J = 7.7$  Hz, 7H), 7.30 (d,  $J = 4.3$  Hz, 3H), 6.93 (d,  $J = 4.2$  Hz, 3H);  $^{13}\text{C}$  NMR (100 MHz,  $\text{DMSO-}d_6$ )  $\delta$  152.5, 148.0, 144.3, 136.9, 136.8, 135.1, 134.4, 133.6, 132.6, 132.4, 132.2, 132.1, 131.2, 129.4, 123.6, 122.7, 119.5, 118.2, 94.1; HRMS (ESI)  $m/z$  calcd for  $\text{C}_{20}\text{H}_{18}\text{BF}_2\text{N}_3\text{S}$   $[\text{M}+\text{H}]^+$  382.1345; found 382.1359.

**2-azido-5,5-difluoro-10-phenyl-5H-4 $\lambda^4$ ,5 $\lambda^4$ -dipyrrolo[1,2-c:2',1'-f][1,3,2]diazaborinine 5c:**

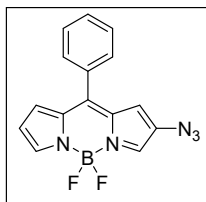

Dark black colour, 70% yield, M.pt- 176-178 °C; <sup>1</sup>H NMR (400 MHz, CDCl<sub>3</sub>)  $\delta$  7.98 (s, 1H), 7.69 (s, 1H), 7.67 – 7.61 (m, 1H), 7.58 (d,  $J$  = 4.4 Hz, 4H), 6.97 (d,  $J$  = 4.2 Hz, 1H), 6.58 (d,  $J$  = 8.2 Hz, 2H); <sup>13</sup>C NMR (100 MHz, CDCl<sub>3</sub>)  $\delta$  146.8, 146.6, 146.0, 136.2, 135.8, 135.2, 133.4, 133.2, 133.2 131.11, 130.4, 128.6, 119.6; HRMS (ESI)  $m/z$  calcd for C<sub>15</sub>H<sub>10</sub>BF<sub>2</sub>N<sub>5</sub> [M+H]<sup>+</sup> 310.1065; found 310.1073.

**Cu-catalyzed nucleophilic substitution of BODIPYs 5d-f:** To a stirred solution of **4a** (100 mg, 0.42 mmol) and appropriate amines (0.48 mmol) in acetonitrile (5 mL) was added CuI (0.04 mmol) and allowed to contents to stir at room temperature for 3-4 h. Upon completion the reaction, water (25 mL) was added, and extracted the mixture with dichloromethane (3  $\times$  25 mL). The organic phase was dried over sodium sulphate and concentrated under reduced pressure. Purification by column chromatography (chloroform and hexane 70:30) afforded **5d**, **5e** and **5g**.

**2-(5,5-difluoro-10-phenyl-5H-4 $\lambda^4$ ,5 $\lambda^4$ -dipyrrolo[1,2-c:2',1'-f][1,3,2]diazaborinin-2-yl) isoindoline-1,3-dione 5d:**

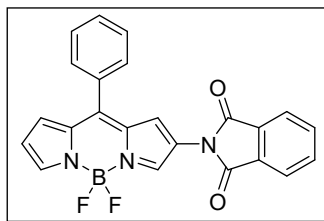

Purple colour, 56% yield, M.pt- 237-238 °C; <sup>1</sup>H NMR (400 MHz, DMSO-*d*<sub>6</sub>)  $\delta$  8.65 (s, 1H), 8.03 (s, 1H), 7.94-7.92 (m, 2H), 7.80 – 7.78 (m, 2H), 7.64-7.56 (m, 5H), 7.46 (s, 1H), 7.02 (d,  $J$  = 4.28 Hz, 1H), 6.61 (d,  $J$  = 4.08 Hz, 1H) ; <sup>13</sup>C NMR (100 MHz, DMSO-*d*<sub>6</sub>)  $\delta$  152.4, 148.0, 144.1, 137.0, 136.9, 134.9, 134.2, 133.4, 132.4, 132.4, 131.2, 131.0, 129.5, 129.3, 126.4, 123.7, 122.5, 119.3, 94.5; <sup>19</sup>F NMR (376 MHz, CDCl<sub>3</sub>)  $\delta$  -136.8 (dd,  $J$  = 56.7, 28.3 Hz); HRMS (ESI)  $m/z$  calcd for C<sub>23</sub>H<sub>14</sub>BF<sub>2</sub>N<sub>3</sub>O<sub>2</sub> [M+H]<sup>+</sup> 414.1219; found 414.1224.

**5,5-difluoro-10-phenyl-2-(piperidin-1-yl)-5H-4 $\lambda^4$ ,5 $\lambda^4$ -dipyrrolo[1,2-c:2',1'-f][1,3,2]-**

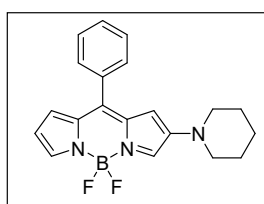

**diazaborinine 5e:**

Yellowish brown colour, 58% yield, M.pt- 69-71 °C; <sup>1</sup>H NMR (400 MHz, CDCl<sub>3</sub>)  $\delta$  7.48 (m, 6H), 7.41 (s, 1H), 6.92 (d,  $J$  = 5.28 Hz, 1H), 6.38 (t,  $J$  = 5.36 Hz, 2H), 3.95 (m, 4H), 1.84 – 1.74 (m, 6H); <sup>13</sup>C NMR (100 MHz, CDCl<sub>3</sub>)  $\delta$  136.14, 134.82, 134.42, 130.36, 128.98, 128.22, 122.98, 114.88, 52.04, 26.39, 24.12; <sup>19</sup>F NMR (376 MHz, CDCl<sub>3</sub>)  $\delta$  -134.9 (dd,  $J$  = 66.4, 32.7 Hz). HRMS (ESI)  $m/z$  calcd for C<sub>20</sub>H<sub>20</sub>BF<sub>2</sub>N<sub>3</sub> [M+H]<sup>+</sup> 351.1718; found 352.1789.

**5,5-difluoro-10-phenyl-2-(piperidin-1-yl)-5H-4 $\lambda^4$ ,5 $\lambda^4$ -dipyrrolo[1,2-c:2',1'-f][1,3,2]-**

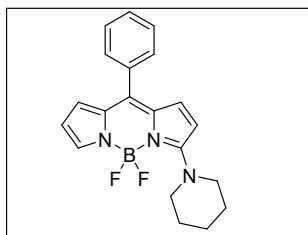

**diazaborinine 5f:**

Yellowish brown colour, 77% yield, M.pt- 65-68 °C; <sup>1</sup>H NMR (400 MHz, CDCl<sub>3</sub>)  $\delta$  7.48 (m, 6H), 6.90 (s, 1H), 6.35 (s, 2H), 6.30 (d,  $J$  = 5.12 Hz, 1H), 3.94 (m, 4H), 1.83 – 1.81 (m, 6H); <sup>13</sup>C NMR (100 MHz, CDCl<sub>3</sub>)  $\delta$  162.04, 135.66, 135.34, 131.51, 130.62, 130.47, 128.79, 128.08, 117.91, 113.80, 113.29, 51.87, 26.38, 24.23. HRMS (ESI)  $m/z$  calcd for C<sub>20</sub>H<sub>20</sub>BF<sub>2</sub>N<sub>3</sub> [M+H]<sup>+</sup> 351.1718; found 352.1791.

**5,5-difluoro-10-phenyl-N-(p-tolyl)-5H-4 $\lambda^4$ ,5 $\lambda^4$ -dipyrrolo[1,2-c:2',1'-f][1,3,2]diazaborinin-2-**

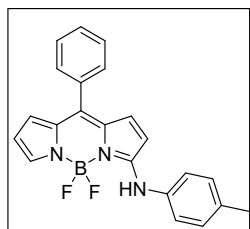

**amine 5g:**

Dark reddish colour, 80% yield, M.pt- 187-190 °C; <sup>1</sup>H NMR (400 MHz, CDCl<sub>3</sub>)  $\delta$  7.49-7.46 (m, 6H), 7.27 – 7.18 (m, 5H), 6.99 (d,  $J$  = 5.0 Hz, 1H), 6.56 (s, 1H), 6.41 (d,  $J$  = 5.0 Hz, 1H), 2.40 (s, 3H). <sup>13</sup>C NMR (100 MHz, CDCl<sub>3</sub>)  $\delta$  159.9, 136.9, 136.4, 135.8, 134.4, 134.0, 133.6, 130.4, 130.2, 129.5, 128.4, 126.0, 123.3, 112.8, 21.0; <sup>19</sup>F NMR (376 MHz, CDCl<sub>3</sub>)  $\delta$  -136.8 (dd,  $J$  = 58.0, 28.4 Hz); HRMS (ESI)  $m/z$  calcd for C<sub>22</sub>H<sub>18</sub>BF<sub>2</sub>N<sub>3</sub> [M+H]<sup>+</sup> 373.1562; found 373.1555.

**Pd-catalyzed nucleophilic substitution of BODIPYs:** To a solution of **4a** (100 mg, 0.42 mmol) and appropriate nucleophiles (0.48 mmol) in dry acetonitrile (5 mL), was added Pd(OAc)<sub>2</sub> (0.04 mmol) and the contents were stirred at 80 °C for 2-4 h. After completion of the reaction, the contents were poured into water (50 mL) and extracted with dichloromethane (3  $\times$  100 mL). The organic layer was dried over anhydrous sodium sulphate and concentrated under reduce pressure. Purification by column chromatography (chloroform and hexane 80:20) afforded the desired product.

**5,5-difluoro-2-(1H-indol-2-yl)-10-phenyl-5H-4 $\lambda^4$ ,5 $\lambda^4$ -dipyrrolo[1,2-c:2',1'-f][1,3,2]-**

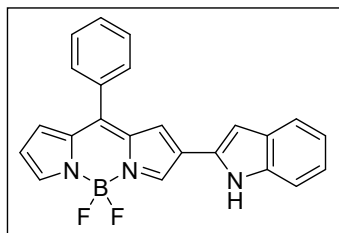

**diazaborinine 5h:**

Golden brown colour, 57% yield, M.pt- 240-242 °C; <sup>1</sup>H NMR (400 MHz, CDCl<sub>3</sub>)  $\delta$  8.29 (s, 2H), 8.00 (s, 1H), 7.67 (m, 1H), 7.63 (m, 5H), 7.32 (d,  $J$  = 8.0 Hz, 1H), 7.2 (m, 2H), 6.99 (s, 1H), 6.96 (d,  $J$  = 4.04,



1H), 6.69 (s, 1H), 6.60 (dd,  $J = 4.00$ , 1H);  $^{13}\text{C}$  NMR (100 MHz,  $\text{CDCl}_3$ )  $\delta$  146.66, 144.58, 141.64, 136.58, 135.43, 135.33, 133.70, 131.78, 131.03, 130.88, 130.46, 129.03, 128.58, 126.36, 123.33, 122.54, 120.53, 120.43, 118.84, 110.73, 100.18; HRMS (ESI)  $m/z$  calcd for  $\text{C}_{23}\text{H}_{16}\text{BF}_2\text{N}_3$   $[\text{M}+\text{H}]^+$  384.1465; found 384.1482.

**5,5-difluoro-2-(3-methyl-1H-indol-2-yl)-10-phenyl-5H-4 $\lambda^4$ ,5 $\lambda^4$ -dipyrrolo[1,2-c:2',1'-**

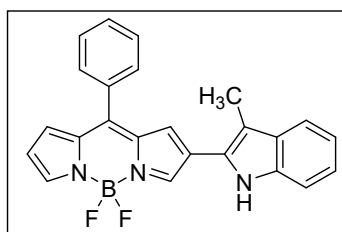

**[1,3,2]diazaborinine 5i:**

Golden brown colour, 77% yield, M.pt- 235-239 °C;  $^1\text{H}$  NMR (400 MHz,  $\text{DMSO}-d_6$ )  $\delta$  11.20 (s, 1H), 8.58 (s, 1H), 8.21 (s, 1H), 7.79 (m, 6H), 7.52 (d,  $J = 7.88$  Hz, 1H), 7.33 (s, 1H), 7.30 (d,  $J = 8$  Hz 1H), 7.11 (m, 1H), 7.06 (d, 1H), 7.02 (m, 1H), 6.74 (dd,  $J = 4.2$ , 1.84 Hz, 1H), 2.43 (s, 3H);  $^{13}\text{C}$  NMR (100 MHz,  $\text{DMSO}-d_6$ )  $\delta$  158.98, 140.22, 138.92, 138.07, 132.47, 130.89, 130.22, 126.45, 125.30, 123.61, 123.00, 122.69, 122.36, 120.96, 118.13, 115.58, 111.96, 109.37, 84.19, 22.04; HRMS (ESI)  $m/z$  calcd for  $\text{C}_{24}\text{H}_{18}\text{BF}_2\text{N}_3$   $[\text{M}+\text{H}]^+$  398.1606; found 398.1639.

**5,5-difluoro-2-(3-methyl-1H-indol-2-yl)-10-phenyl-5H-4 $\lambda^4$ ,5 $\lambda^4$ -dipyrrolo[1,2-c:2',1'-**

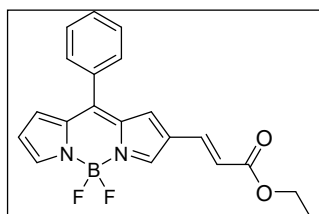

**[1,3,2]diazaborinine 5j:**

Pink colour, 50% yield, M.pt-75-78 °C;  $^1\text{H}$  NMR (400 MHz,  $\text{CDCl}_3$ )  $\delta$  8.08 (s, 1H), 8.05 (s, 1H), 7.65-7.58 (m, 5H), 7.57 (d,  $J = 16$  Hz, 1H), 7.05 (d,  $J = 4.4$  Hz, 1H), 7.02 (s, 1H), 6.64 (d,  $J = 3.48$  Hz, 1H), 6.26 (d,  $J = 15.96$  Hz, 1H), 4.27 (q,  $J = 7.16$ , 14.28 Hz, 2H), 1.34 (t,  $J = 7.16$  Hz, 3H);  $^{13}\text{C}$  NMR (100 MHz,  $\text{CDCl}_3$ )  $\delta$  166.9, 147.8, 146.4, 142.5, 135.8, 135.6, 135.1, 133.4, 133.1, 131.2, 130.1, 128.7, 128.5, 127.8, 119.8, 117.9, 60.5, 14.3;  $^{19}\text{F}$  NMR (376 MHz,  $\text{CDCl}_3$ )  $\delta$  -145.05 (dd,  $J = 56.8$ , 28.4 Hz); HRMS (ESI)  $m/z$  calcd for  $\text{C}_{20}\text{H}_{18}\text{BF}_2\text{N}_2\text{O}_2$   $[\text{M}+\text{H}]^+$  367.1429; found 367.1432.

**General procedure for the synthesis of BODIPY dimer**

To a 10 mL vial with magnetic stir bar BODIPY iodonium salts **4a/4g** (100 mg, 0.146 mmol), catalytic amount of  $\text{Pd}(\text{OAc})_2$  (5 mol%) and PEG-400 (2 mL) were added. The reaction vial was kept under MW irradiation for 20 min at 80 °C. Completion of the reaction was confirmed by TLC and the resulting contents were taken into water, extracted with ethyl acetate (3×3 mL) and dried the combined organic layer over anhydrous sodium sulfate. After removal of the organic solvent, the residue so obtained was purified by column chromatography and afforded the desired product **5k** and **5l** in 79-82% yield.

**5,5,5',5'-tetrafluoro-10,10'-diphenyl-5*H*,5'*H*-4 $\lambda^4$ ,5 $\lambda^4$ ,5' $\lambda^4$ ,6' $\lambda^4$ -2,2'-bidipyrrolo[1,2-*c*:2',1'-**

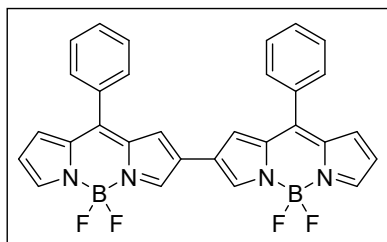

**f][1,3,2]diazaborinine 5k:**

Purple colour, 79% yield, M.pt- 237-238 °C; <sup>1</sup>H NMR (400 MHz, DMSO-*d*<sub>6</sub>)  $\delta$  8.89 (s, 2H), 8.13 (s, 2H), 7.72-7.68 (m, 6H), 7.65 – 7.61 (m, 4H), 7.53 (s, *J* = 7.7 Hz, 2H), 6.99 (d, *J* = 3.92, 10.4 Hz, 2H), 6.70 (dd, *J* = 1.88, 4.2 Hz, 2H); <sup>13</sup>C NMR (100 MHz, DMSO-*d*<sub>6</sub>)  $\delta$  146.72, 144.73, 135.36, 134.83, 133.47, 131.80, 131.47, 131.14, 129.19, 127.26, 126.32, 119.53; <sup>19</sup>F NMR (376 MHz, CDCl<sub>3</sub>)  $\delta$  -136.8 (dd, *J* = 58.0, 28.4 Hz). HRMS (ESI) *m/z* calcd for C<sub>30</sub>H<sub>20</sub>B<sub>2</sub>F<sub>2</sub>N<sub>4</sub> [M+H]<sup>+</sup> 535.1890; found 535.1893.

**5,5,5',5'-tetrafluoro-10,10'-diphenyl-5*H*,5'*H*-4 $\lambda^4$ ,5 $\lambda^4$ ,5' $\lambda^4$ ,6' $\lambda^4$ -2,2'-bidipyrrolo[1,2-*c*:2',1'-**

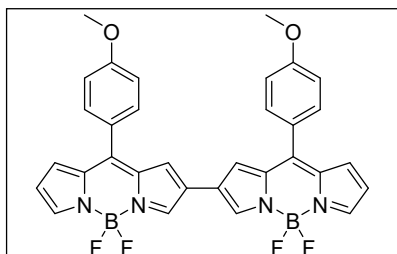

**f][1,3,2]diazaborinine 5l:**

Purple colour, 82% yield, M.pt- 235-238 °C; <sup>1</sup>H NMR (400 MHz, CDCl<sub>3</sub>)  $\delta$  8.13 (s, 2H), 7.95 (s, 2H), 7.61 (d, *J* = 27.9, 10.4 Hz, 4H), 7.12 (d, *J* = 8.6, 4H), 7.02 (m, 4H), 6.59 (dd, *J* = 4.0, 1.2 Hz, 2H), 3.96 (s, 6H); <sup>13</sup>C NMR (100 MHz, CDCl<sub>3</sub>)  $\delta$  154.5, 152.6, 151.1, 147.8, 146.2, 143.5, 138.1, 136.8, 134.4, 132.5, 132.4, 132.2, 131.2, 129.3, 128.5, 125.9, 125.7, 124.8, 123.6, 123.6, 92.8, 40.0, 38.9, 33.8, 24.4, 24.0, 21.2; <sup>19</sup>F NMR (376 MHz, CDCl<sub>3</sub>)  $\delta$  -145.0 (dd, *J* = 57.4, 29.8 Hz). HRMS (ESI) *m/z* calcd for C<sub>32</sub>H<sub>25</sub>B<sub>2</sub>F<sub>4</sub>N<sub>4</sub>O<sub>2</sub> [M+H]<sup>+</sup> 595.2021; found 595.2118.

## IV. Spectra ( $^1\text{H}$ , $^{13}\text{C}$ NMR and HRMS) of the synthesized compounds

### $^1\text{H}$ NMR spectrum of 4a

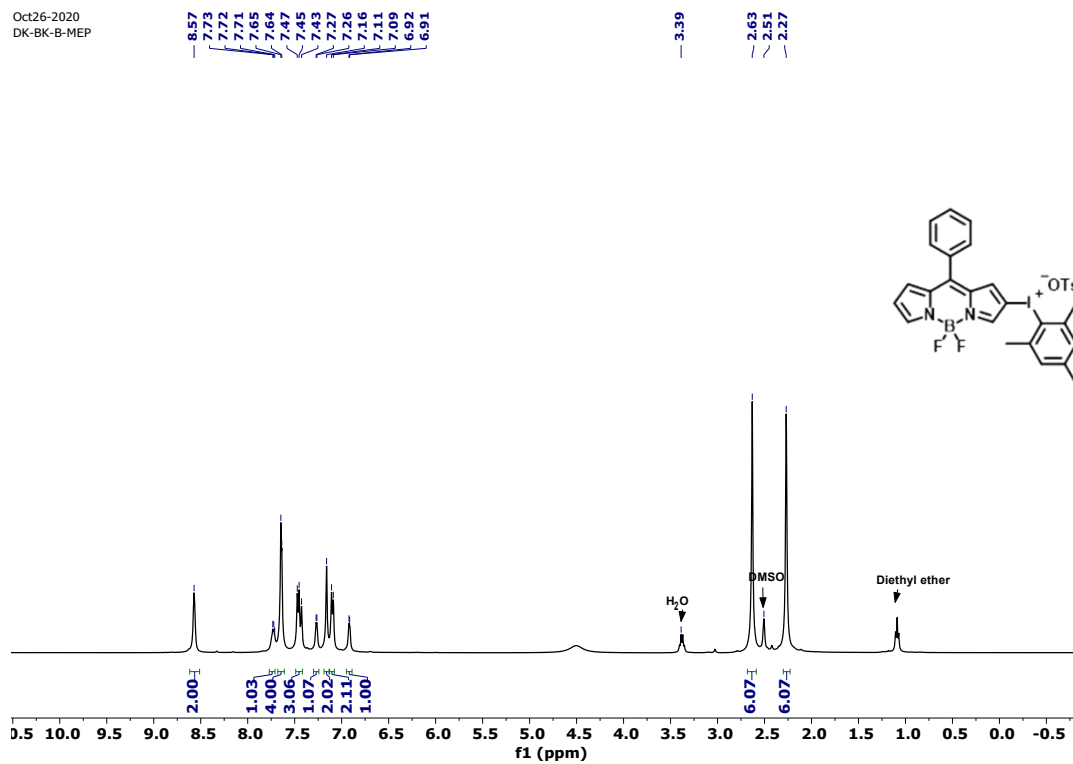

### $^{13}\text{C}$ NMR spectrum of 4a

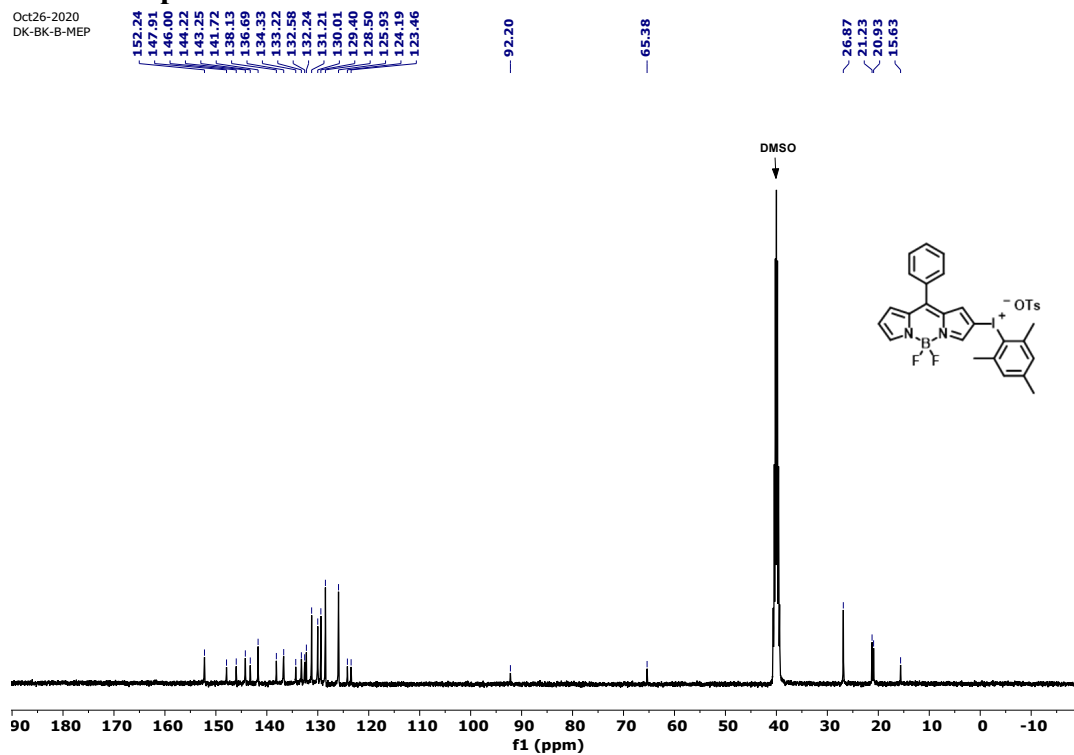

## $^{19}\text{F}$ NMR spectrum of 4a

Oct27-2020  
DK-BK-B-MEP

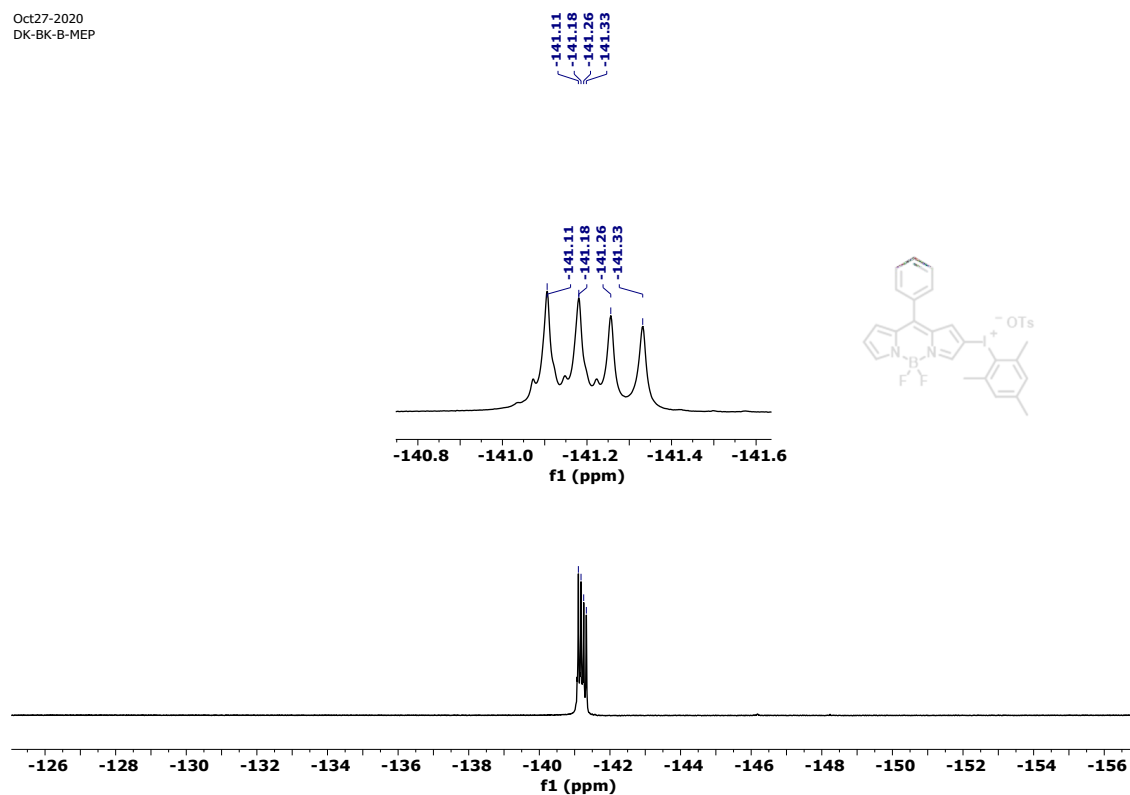

## HRMS spectrum of 4a

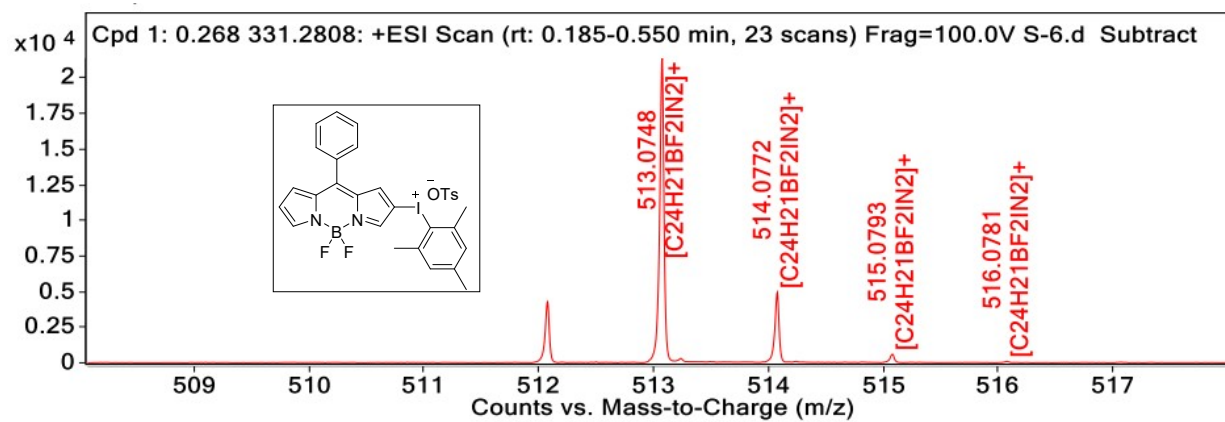

# <sup>1</sup>H NMR spectrum of 4b

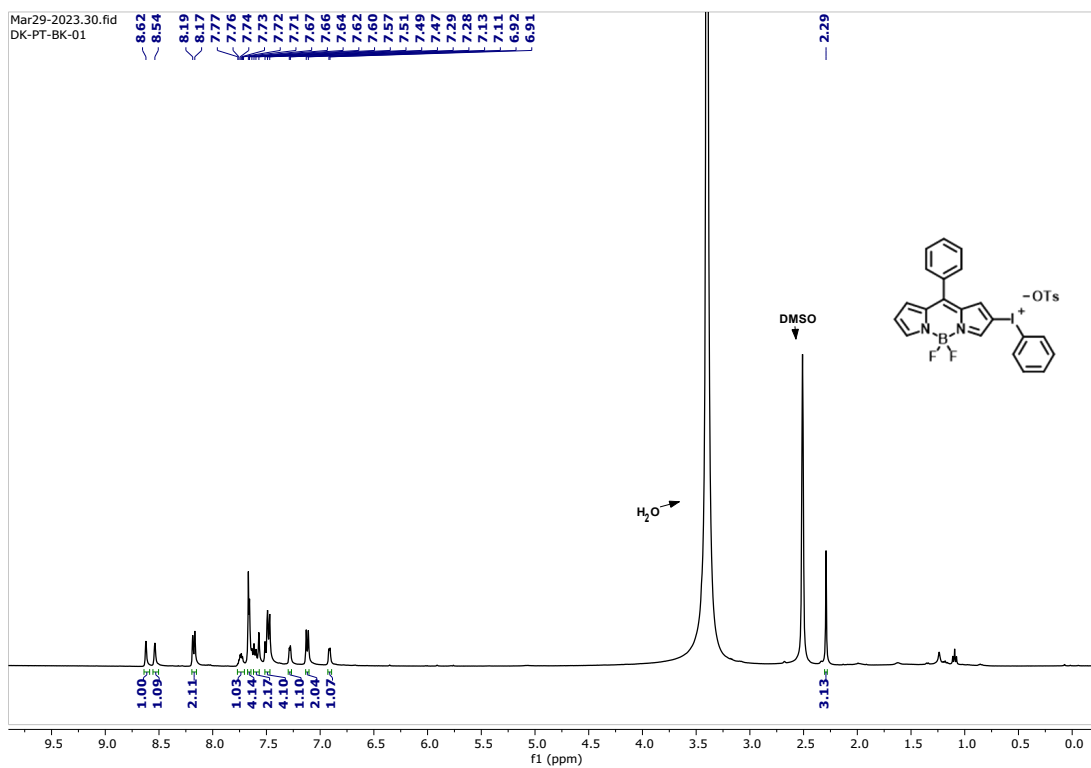

### <sup>13</sup>C NMR spectrum of 4b

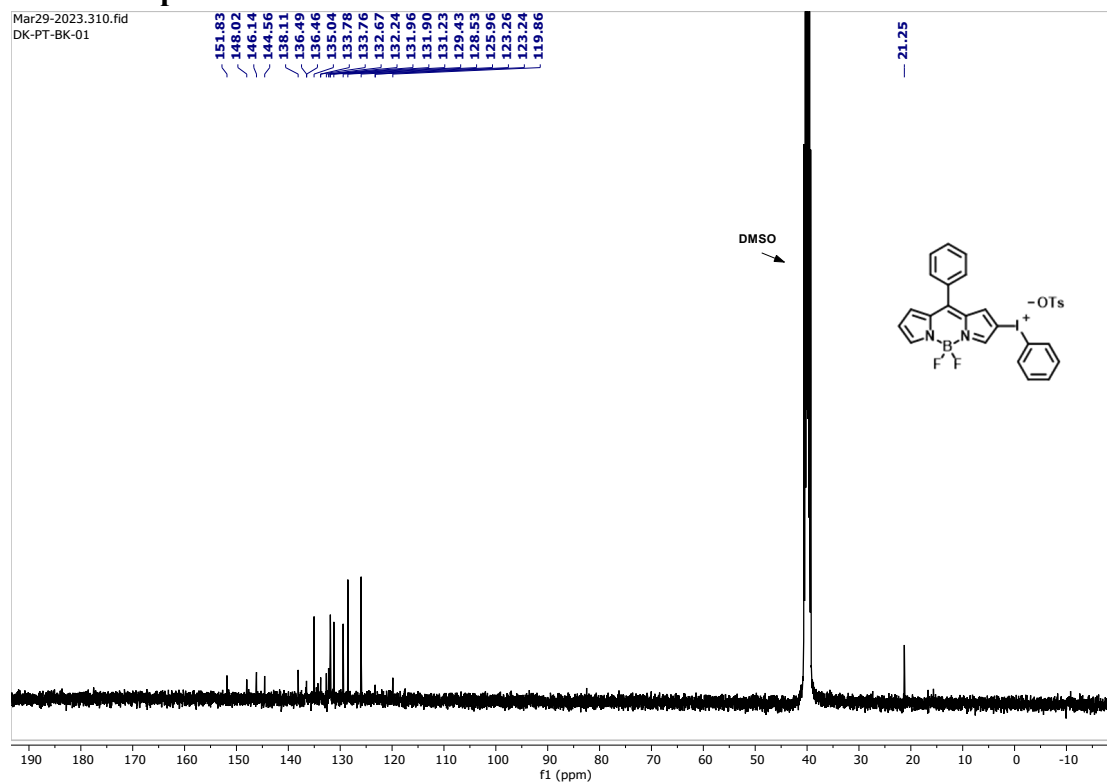

### HRMS spectrum of 4b

MS Zoomed Spectrum

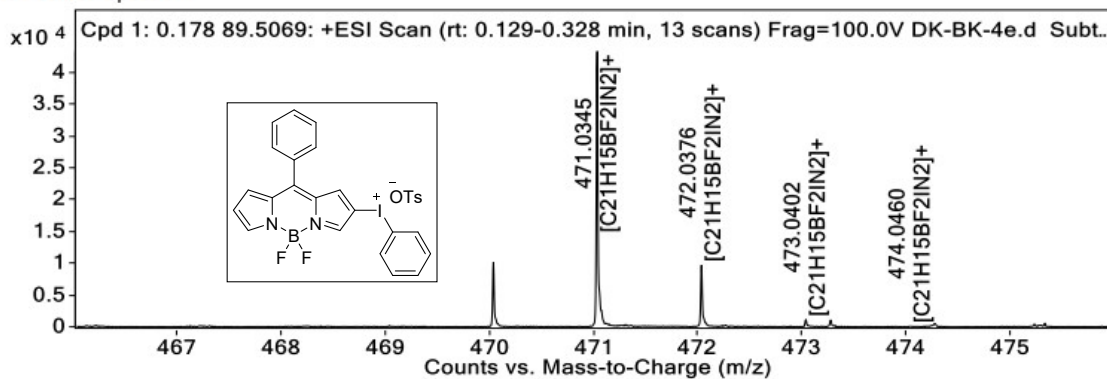

### <sup>1</sup>H NMR spectrum of 4c

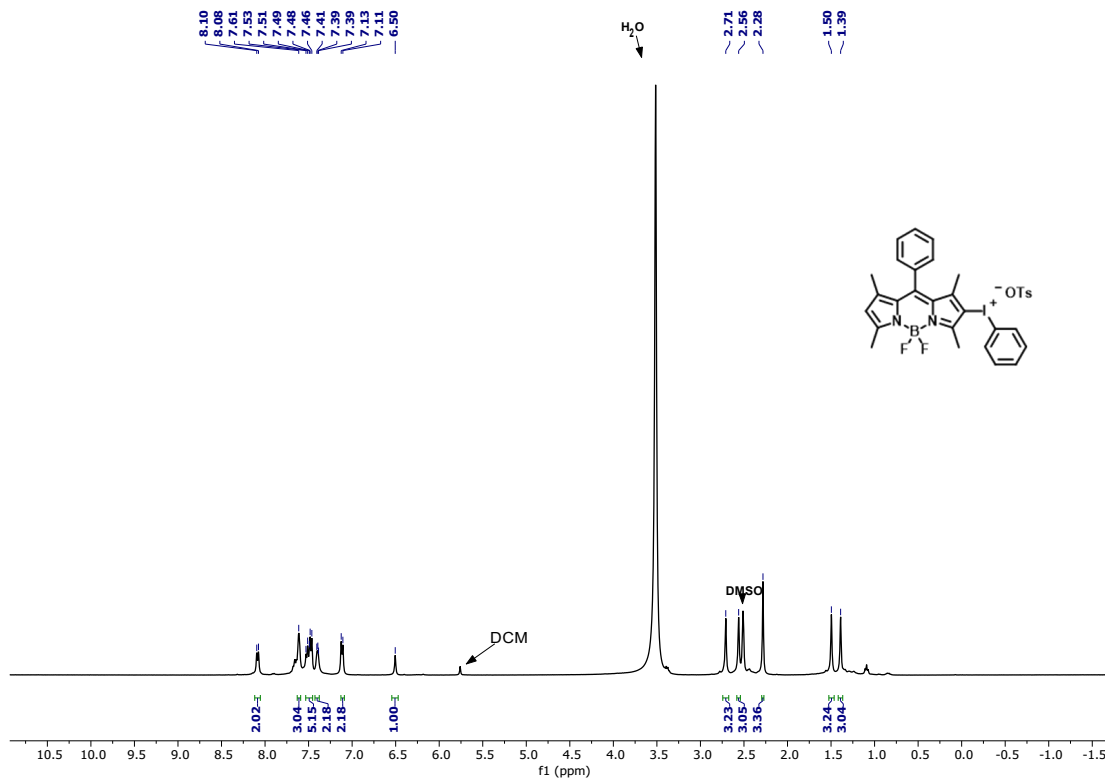

**<sup>13</sup>C NMR spectrum of 4c**

Oct26-2020  
DK-BK-S-PH

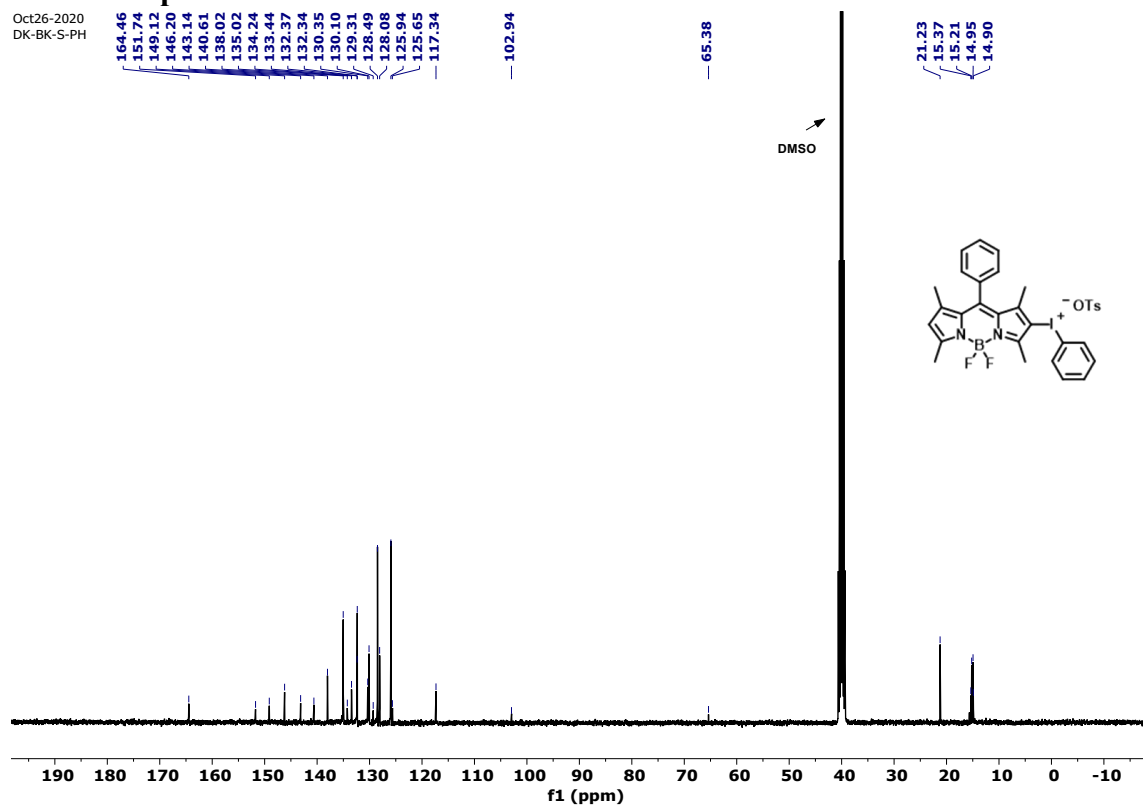

**<sup>19</sup>F NMR spectrum of 4c**

Oct27-2020  
DK-BK-S-PH

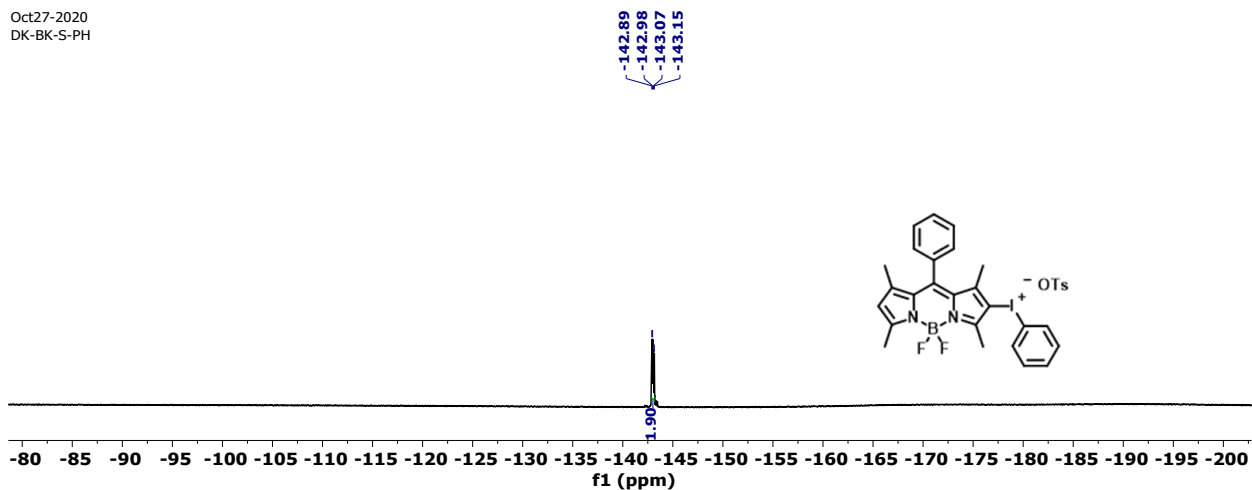

## HRMS spectrum of 4c

MS Zoomed Spectrum

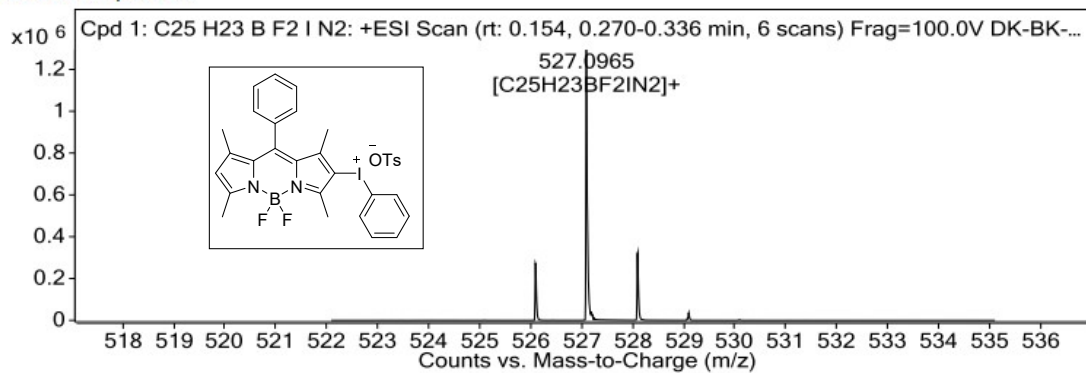

## <sup>1</sup>H NMR spectrum of 4d



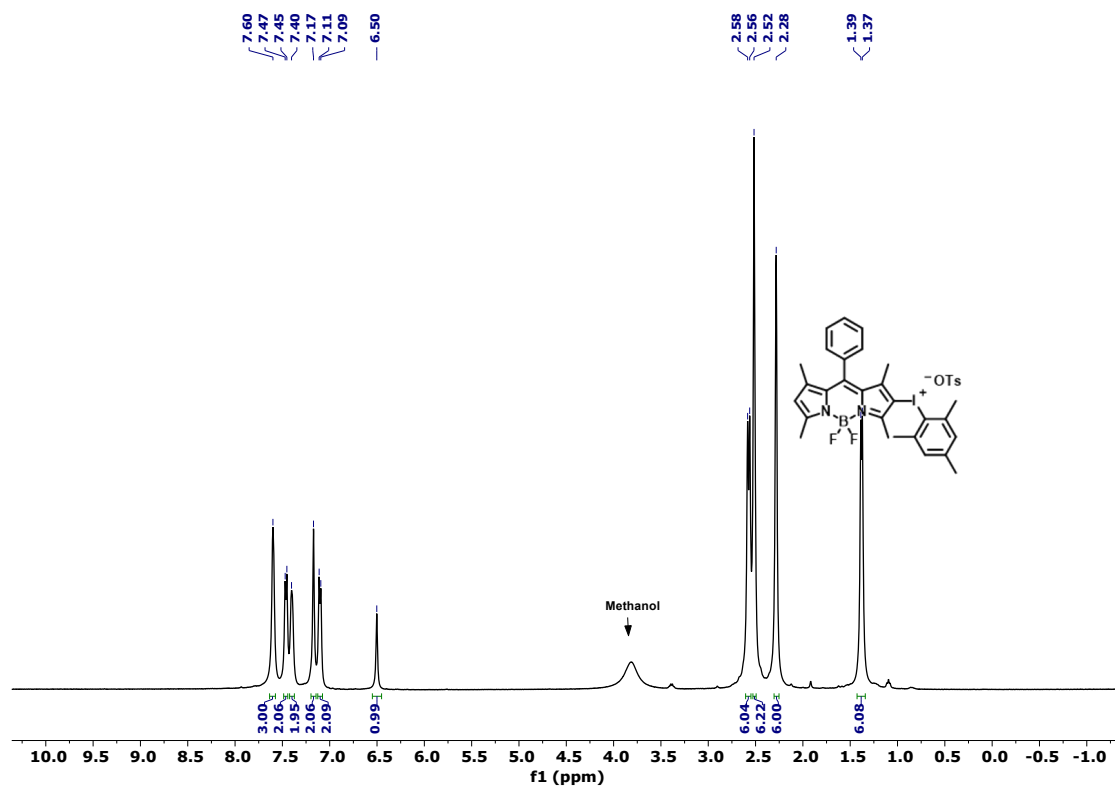

**<sup>13</sup>C NMR spectrum of 4d**

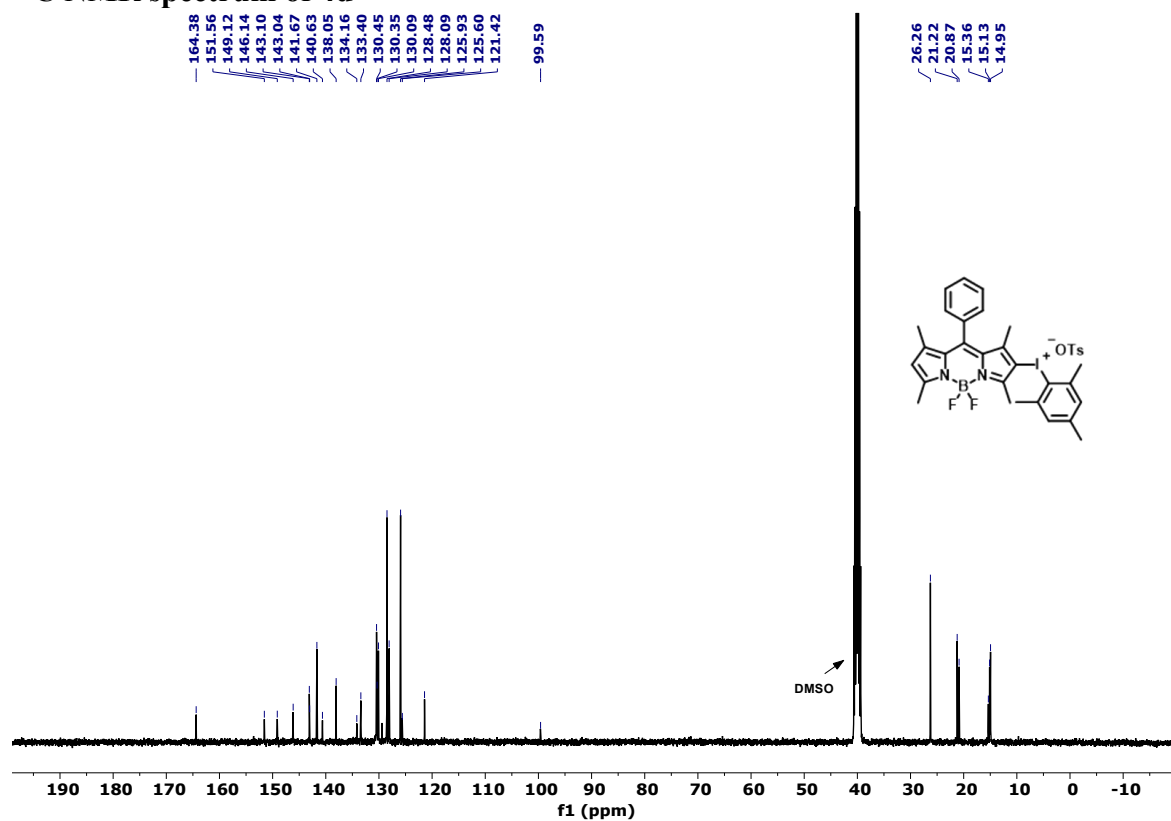

**HRMS spectrum of 4d**

MS Zoomed Spectrum

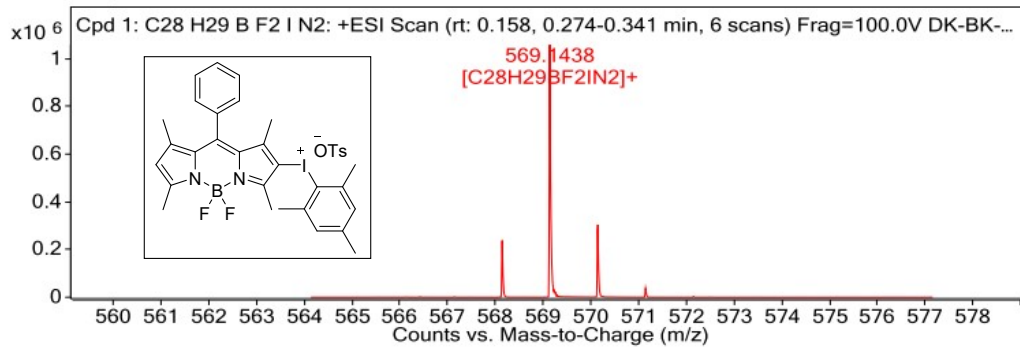

<sup>1</sup>H NMR spectrum of 4e

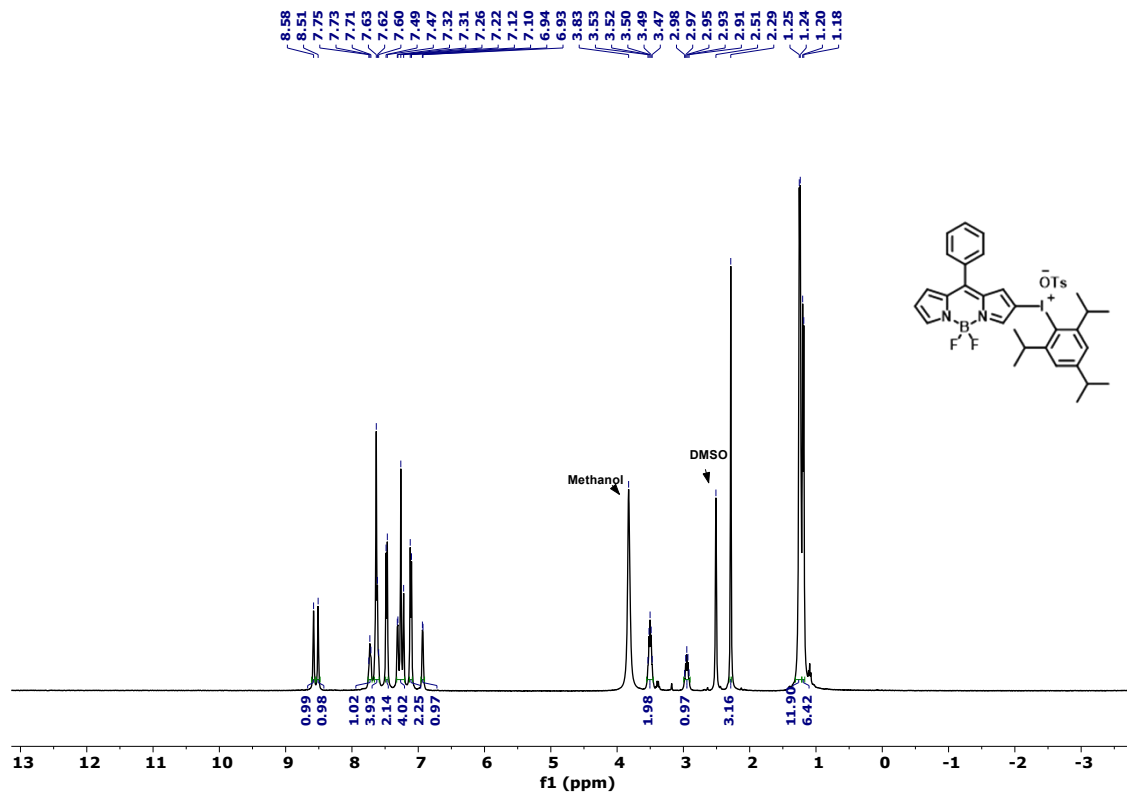

### <sup>13</sup>C NMR spectrum of 4e

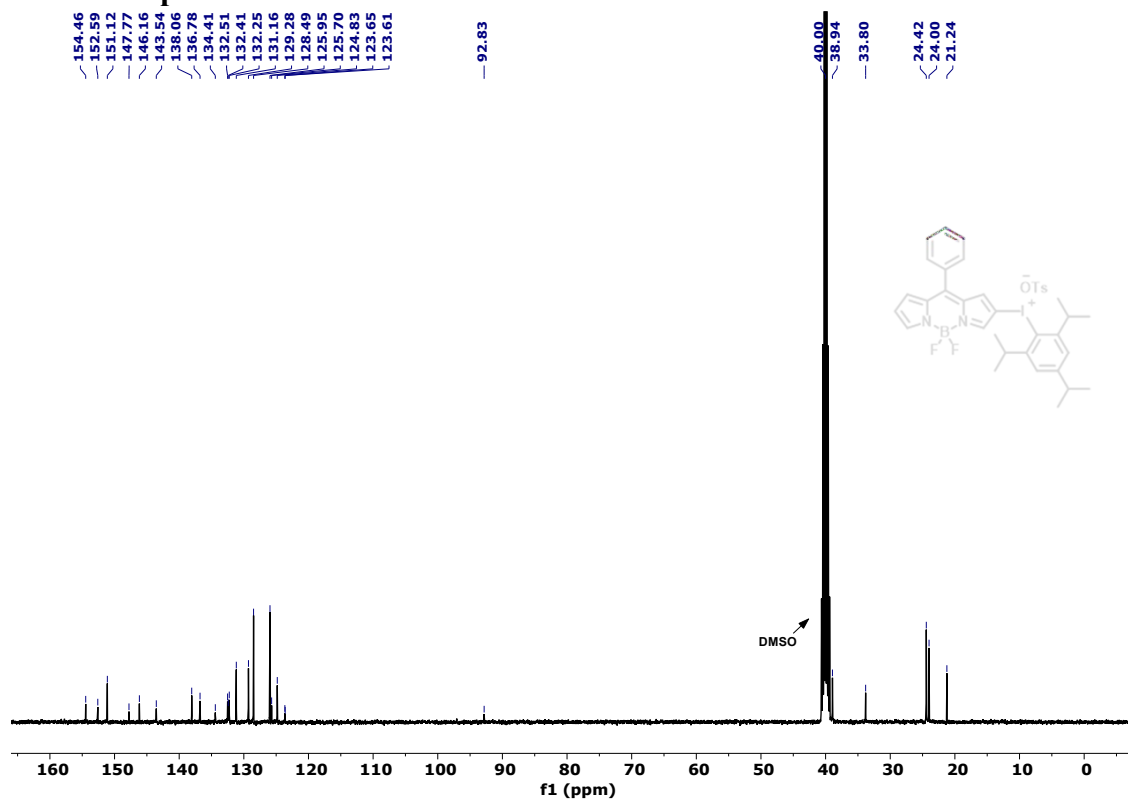

### HRMS spectrum of 4e

#### MS Zoomed Spectrum

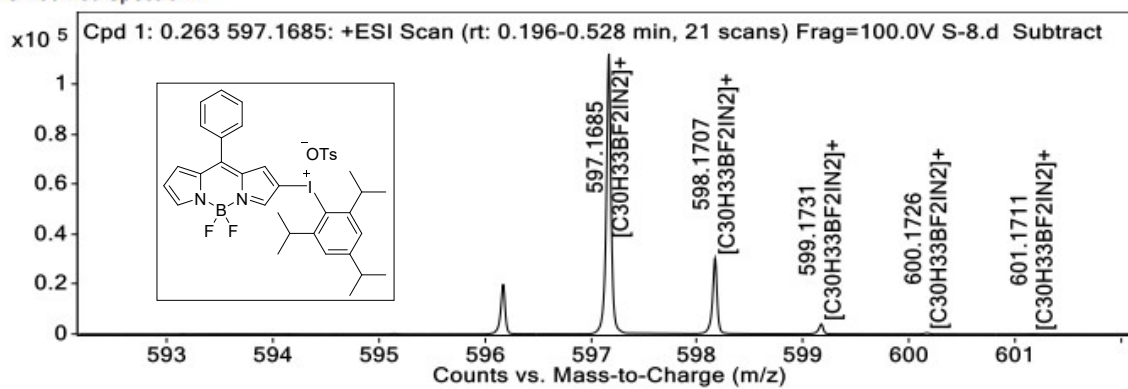

### <sup>1</sup>H NMR spectrum of 4f

Jun06-2023.1.fid  
DK-PS-BK-OME

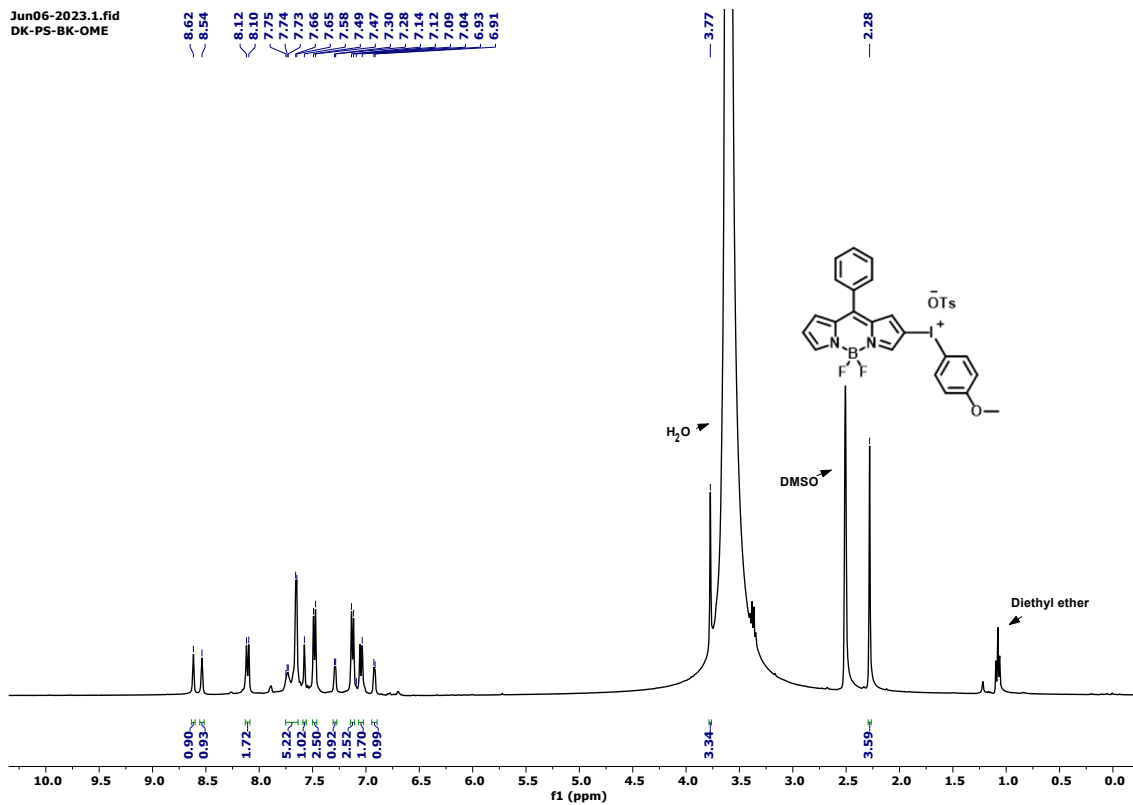

### <sup>13</sup>C NMR spectrum of 4f

Jun06-2023.259.fid  
DK-PS-BK-OME

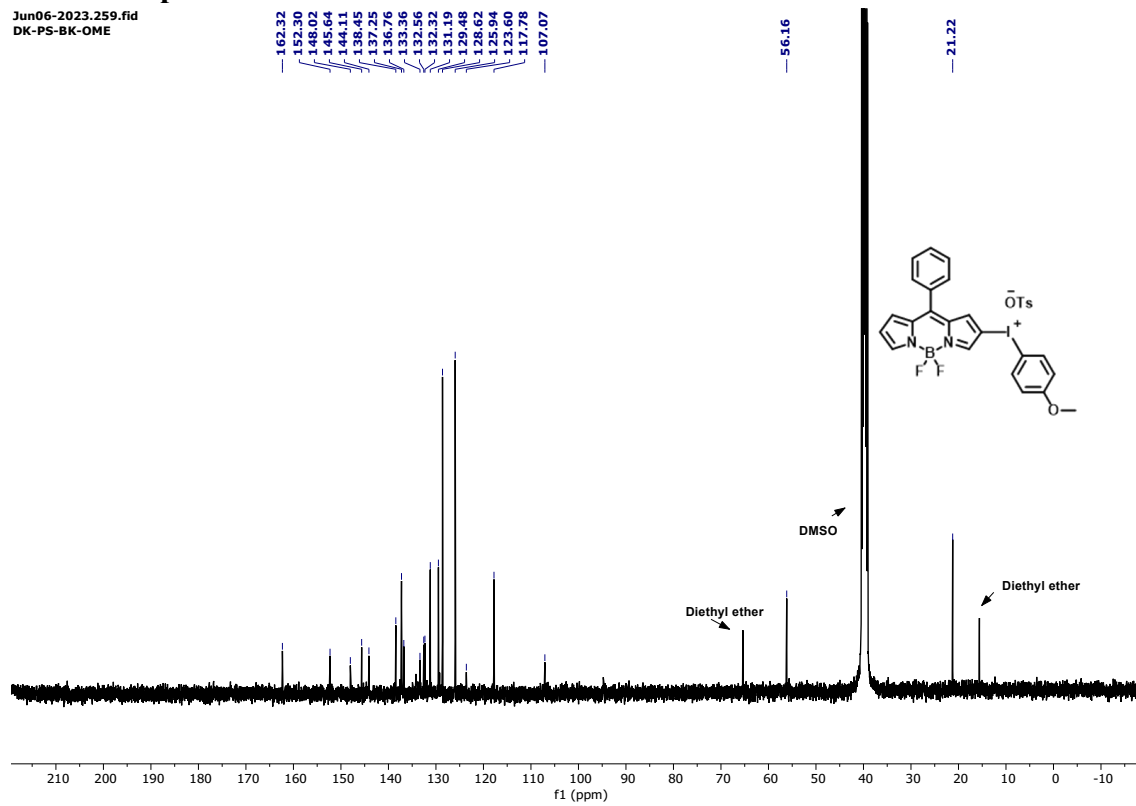

## $^{19}\text{F}$ NMR spectrum of 4f

Jun06-2023.258.fid  
DK-PS-BK-OME

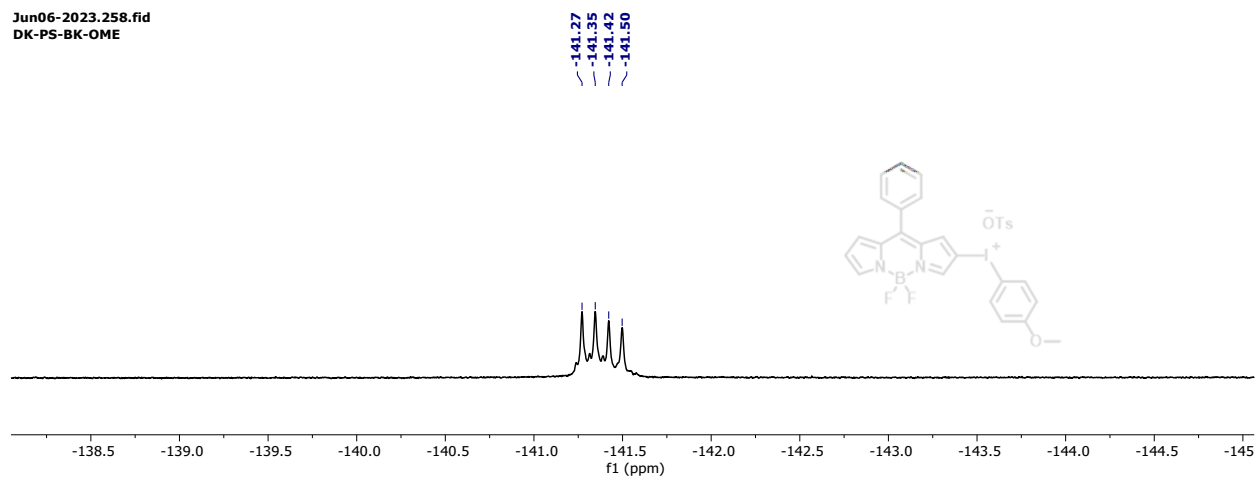

## HRMS spectrum of 4f

MS Zoomed Spectrum

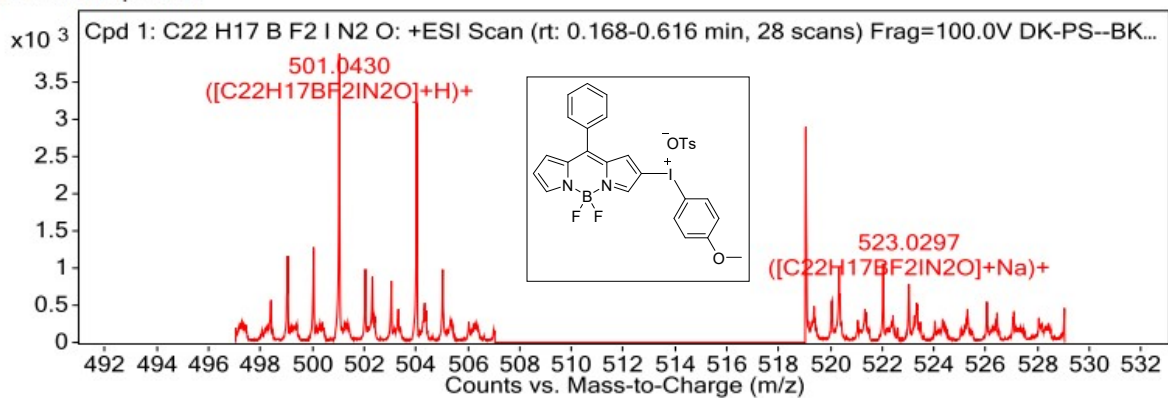

# <sup>1</sup>H NMR spectrum of 4g

Jun10-2023.3.fid  
DK-PS-OME 2

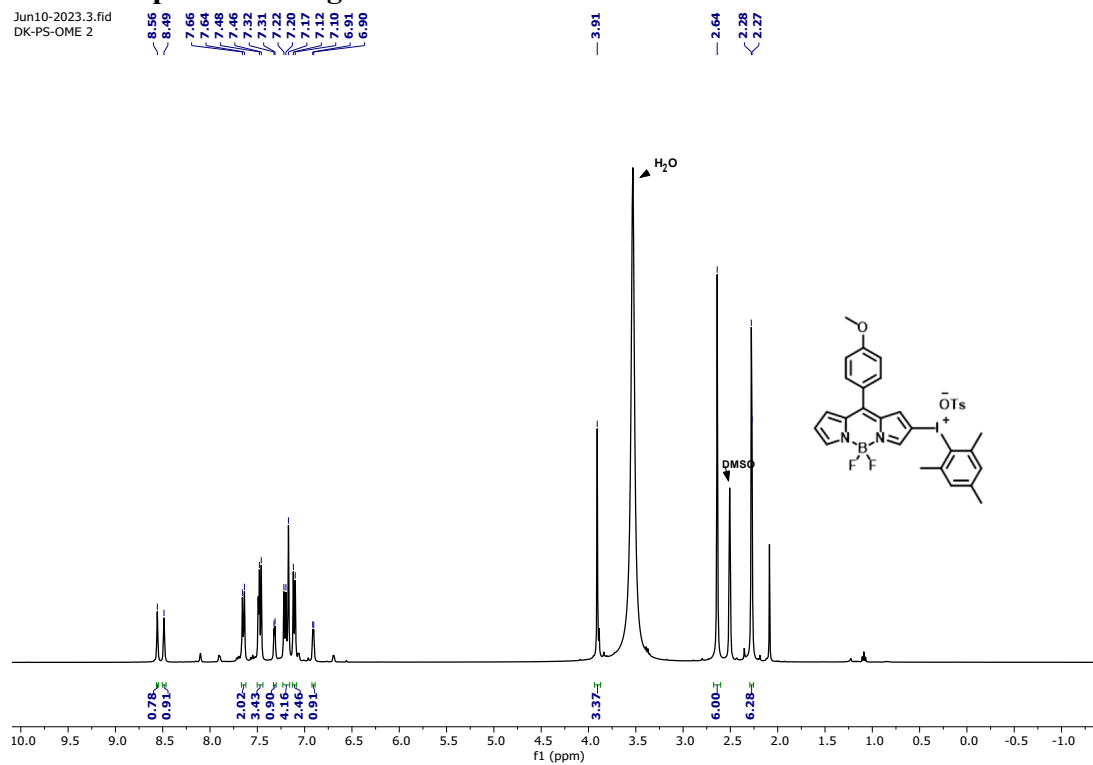

# <sup>13</sup>C NMR spectrum of 4g

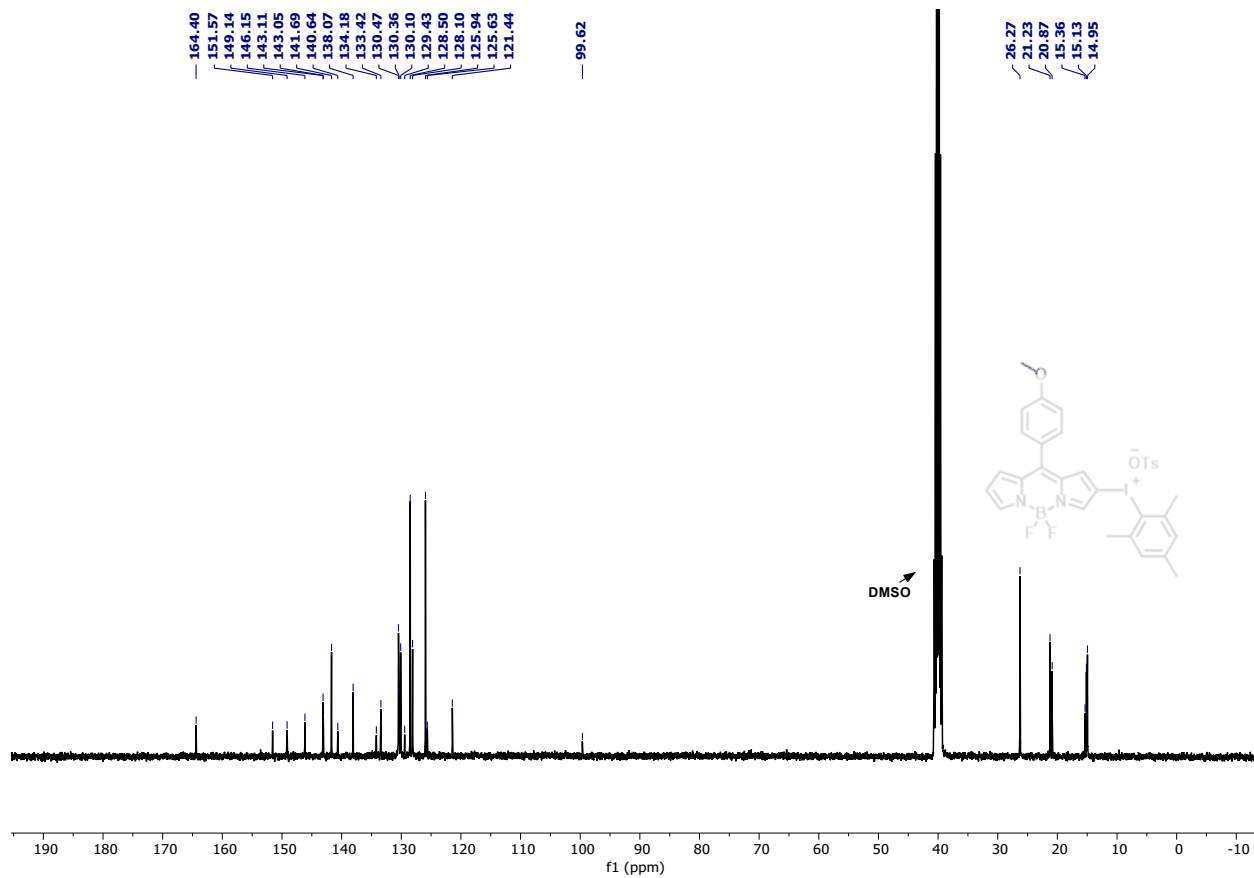

### <sup>19</sup>F NMR spectrum of 4g

Jul10-2023.2.fid  
DK-PS-OME 2R

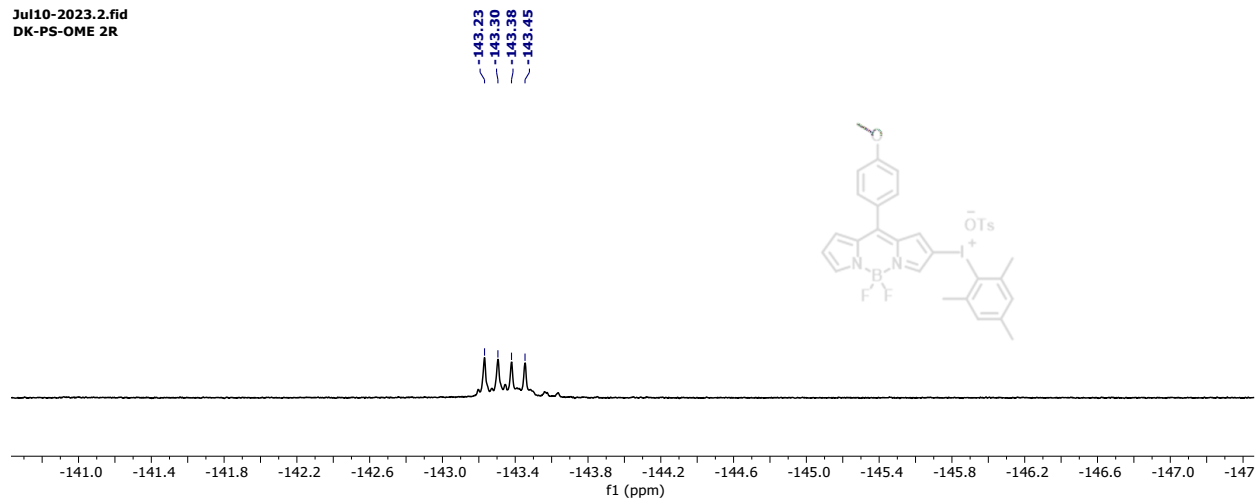

### HRMS spectrum of 4g

MS Zoomed Spectrum

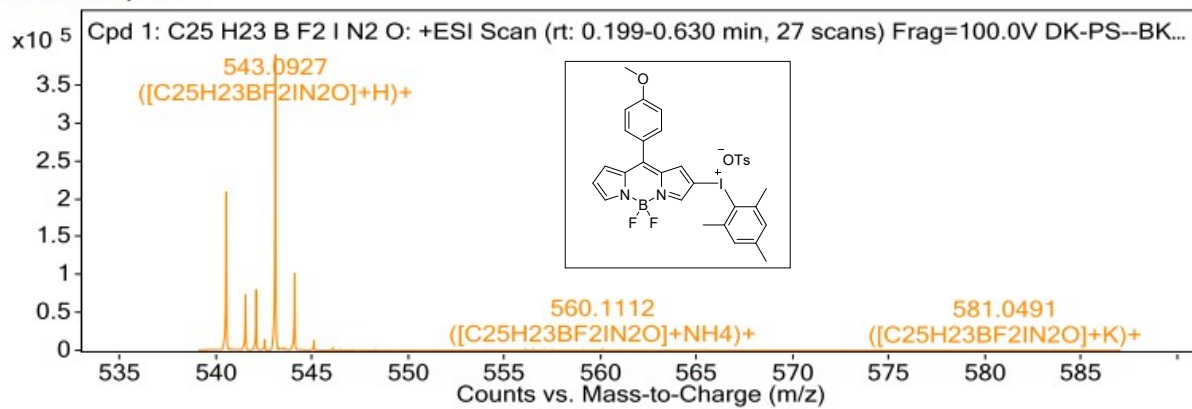

<sup>1</sup>H NMR spectrum of 5a

Aug29-2020  
 DK-BK-A3

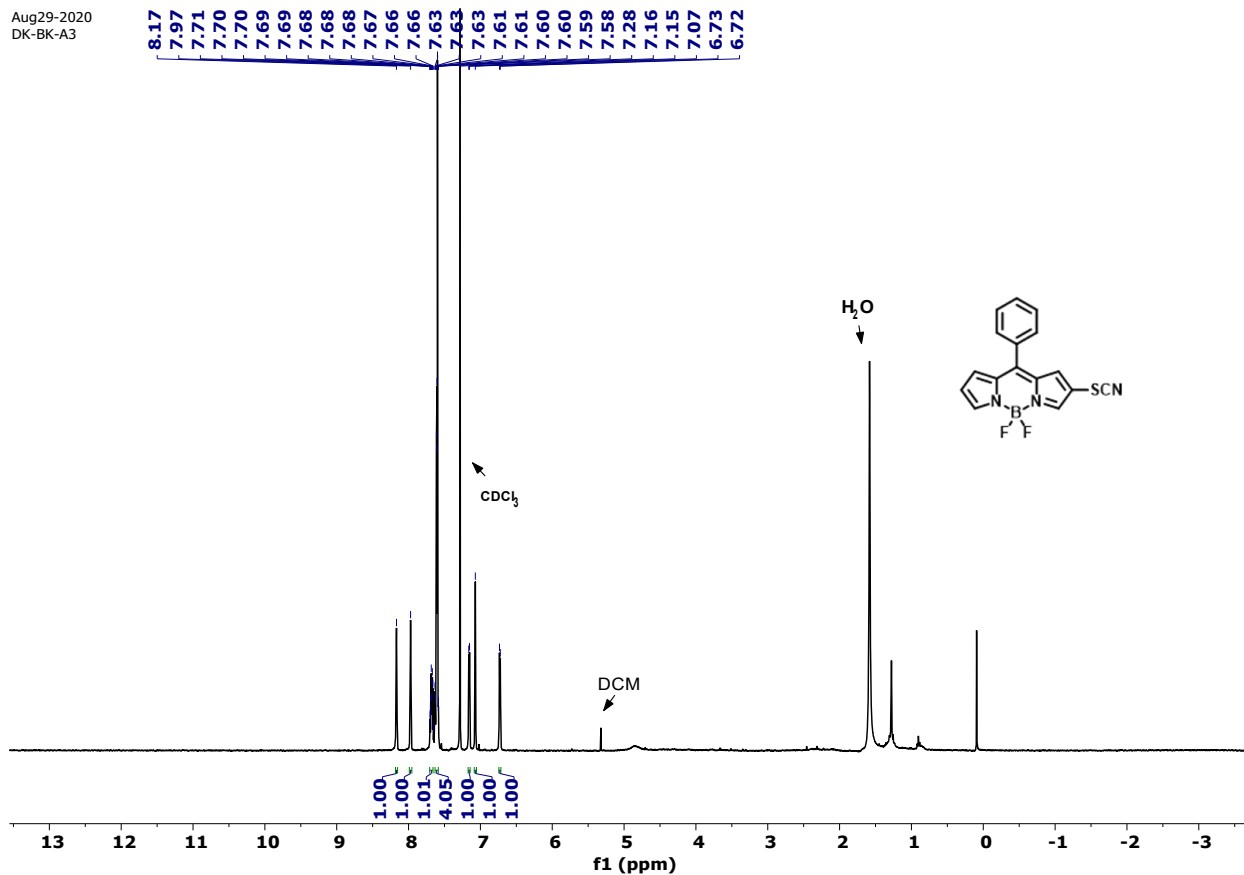



### <sup>13</sup>C NMR spectrum of 5a

Aug29-2020  
DK-BK-A3

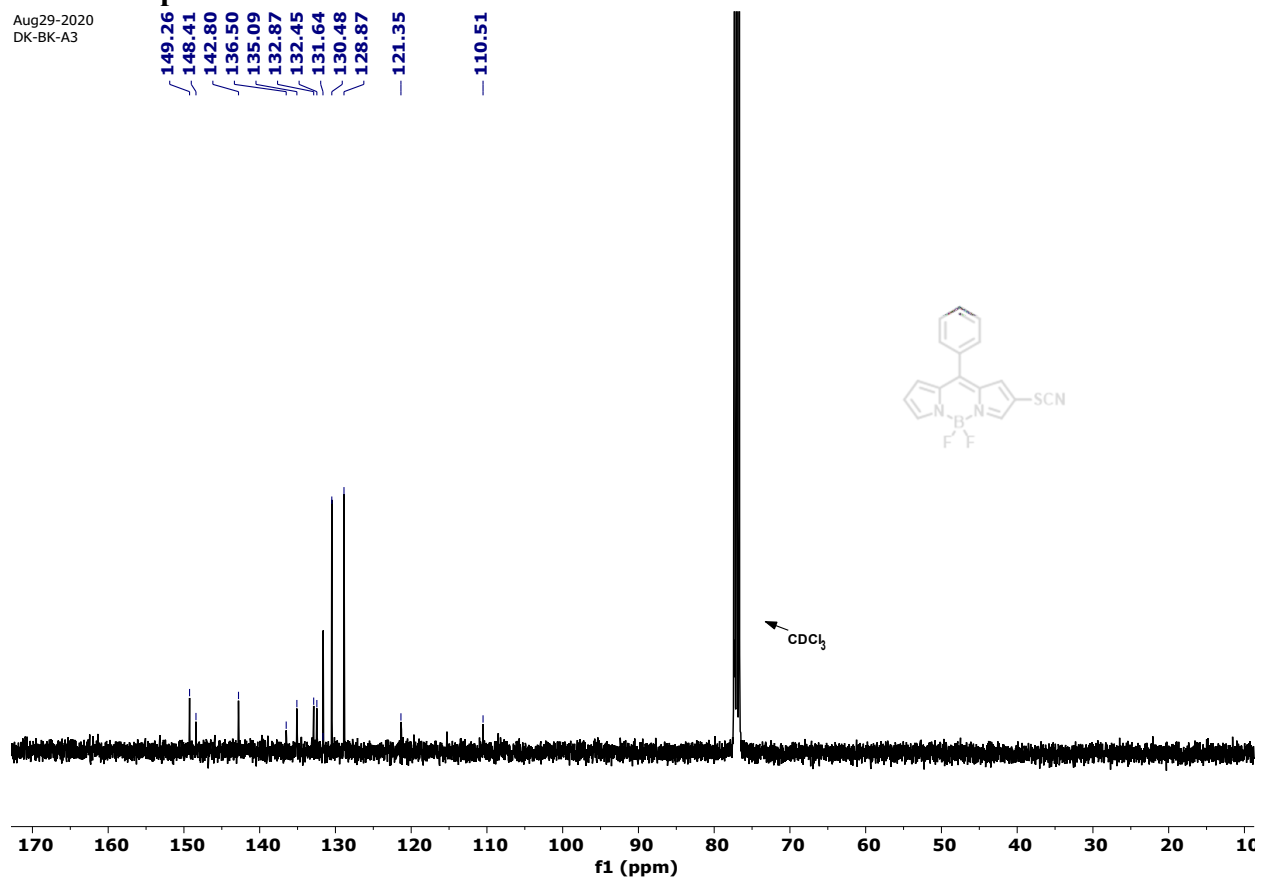

### HRMS spectrum of 5a

MS Zoomed Spectrum

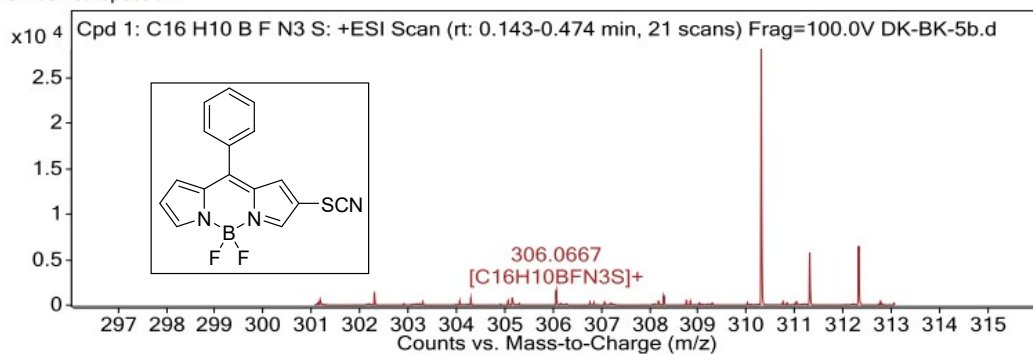

# <sup>1</sup>H NMR spectrum of 5b

Desktop  
BK-APP-REP

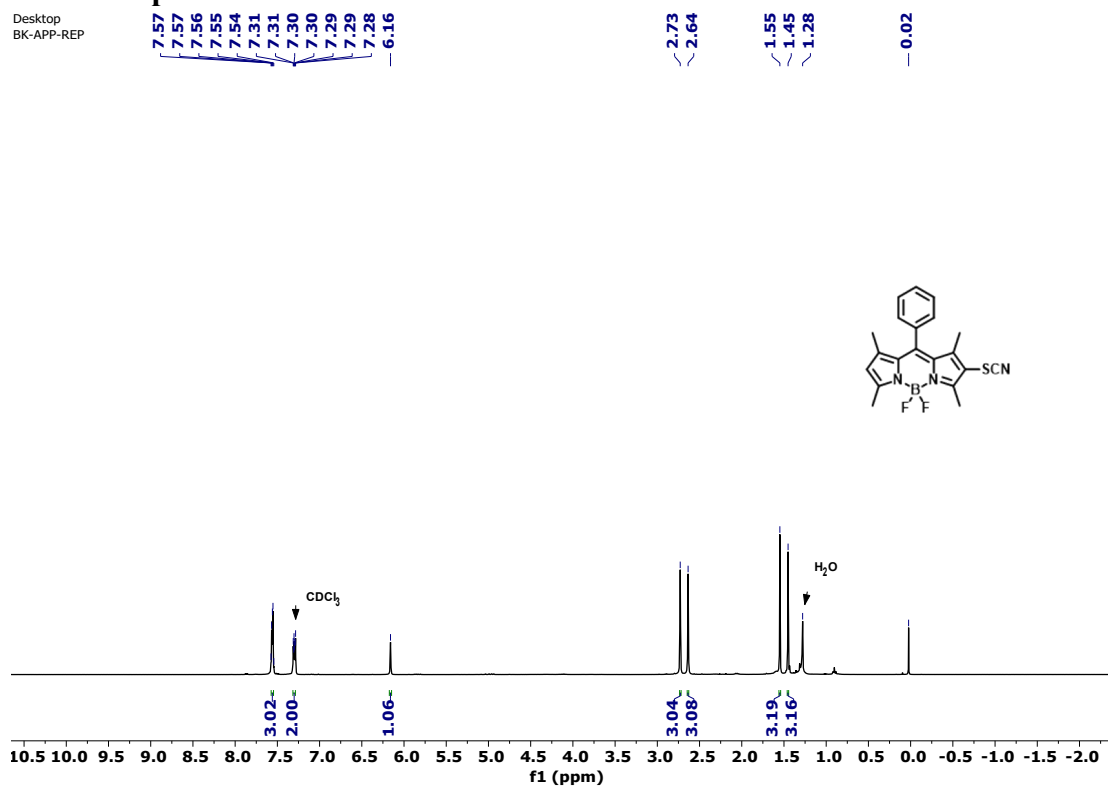

# <sup>13</sup>C NMR spectrum of 5b

Sep14-2020  
DK-BK-A-3

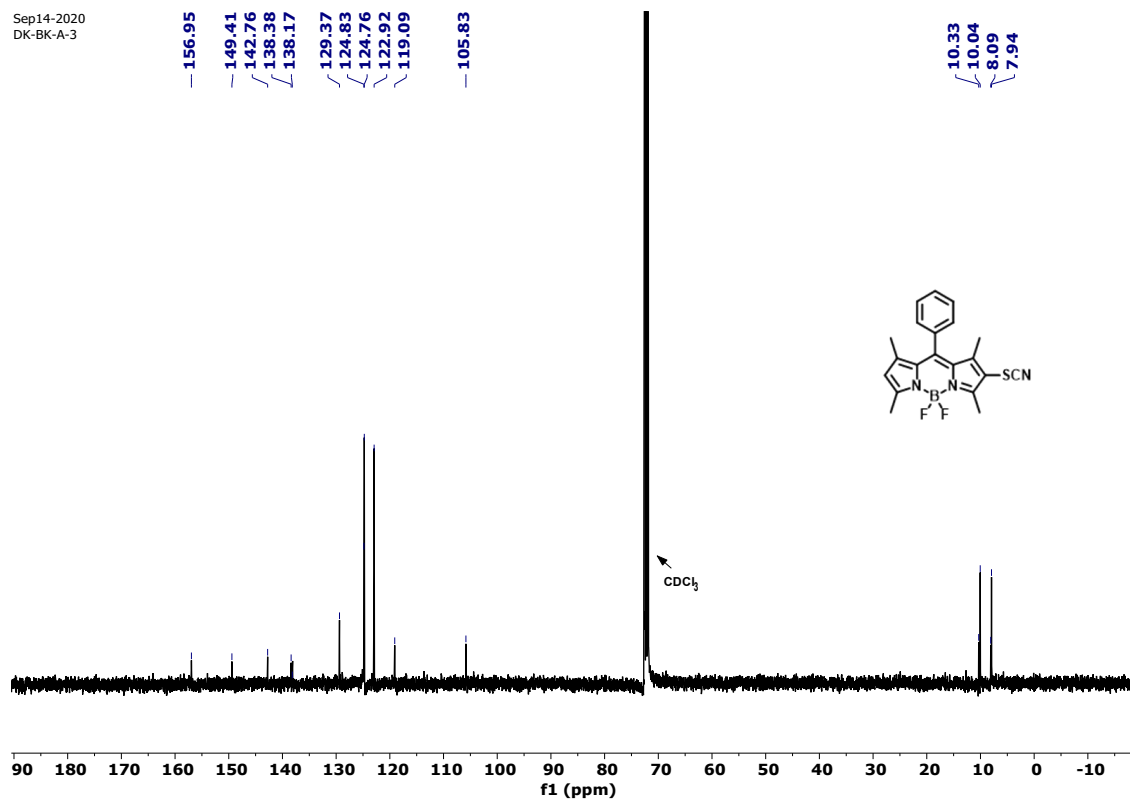

## HRMS spectrum of 5b

MS Zoomed Spectrum

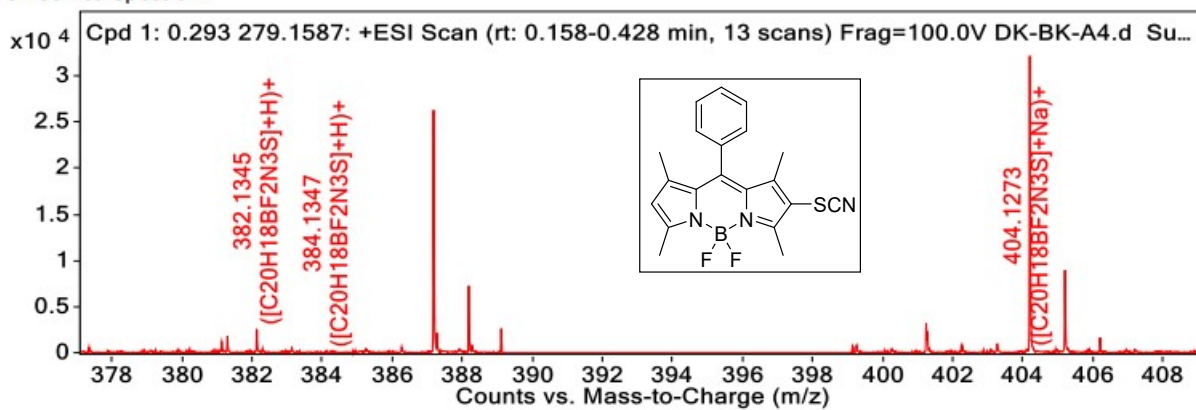

## <sup>1</sup>H NMR spectrum of 5c

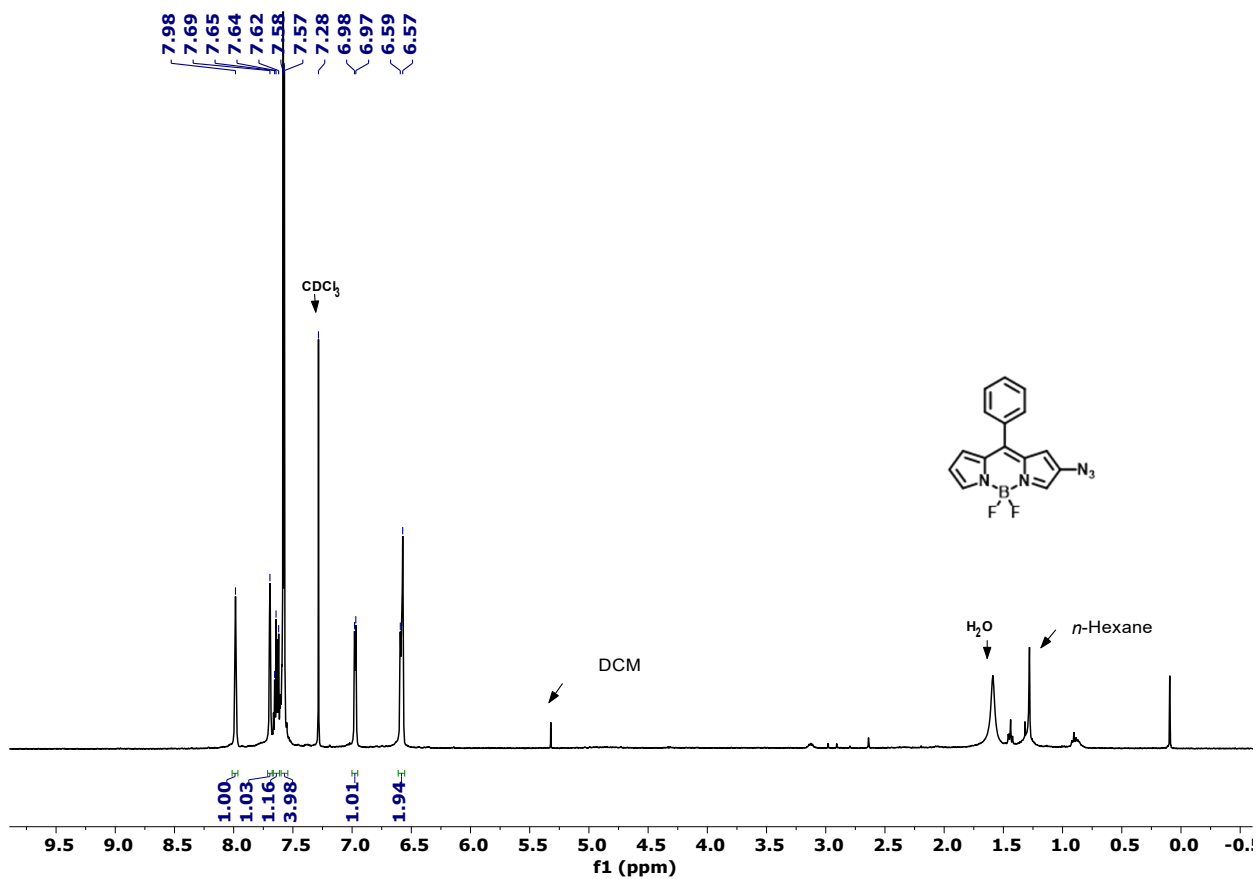

### <sup>13</sup>C NMR spectrum of 5c

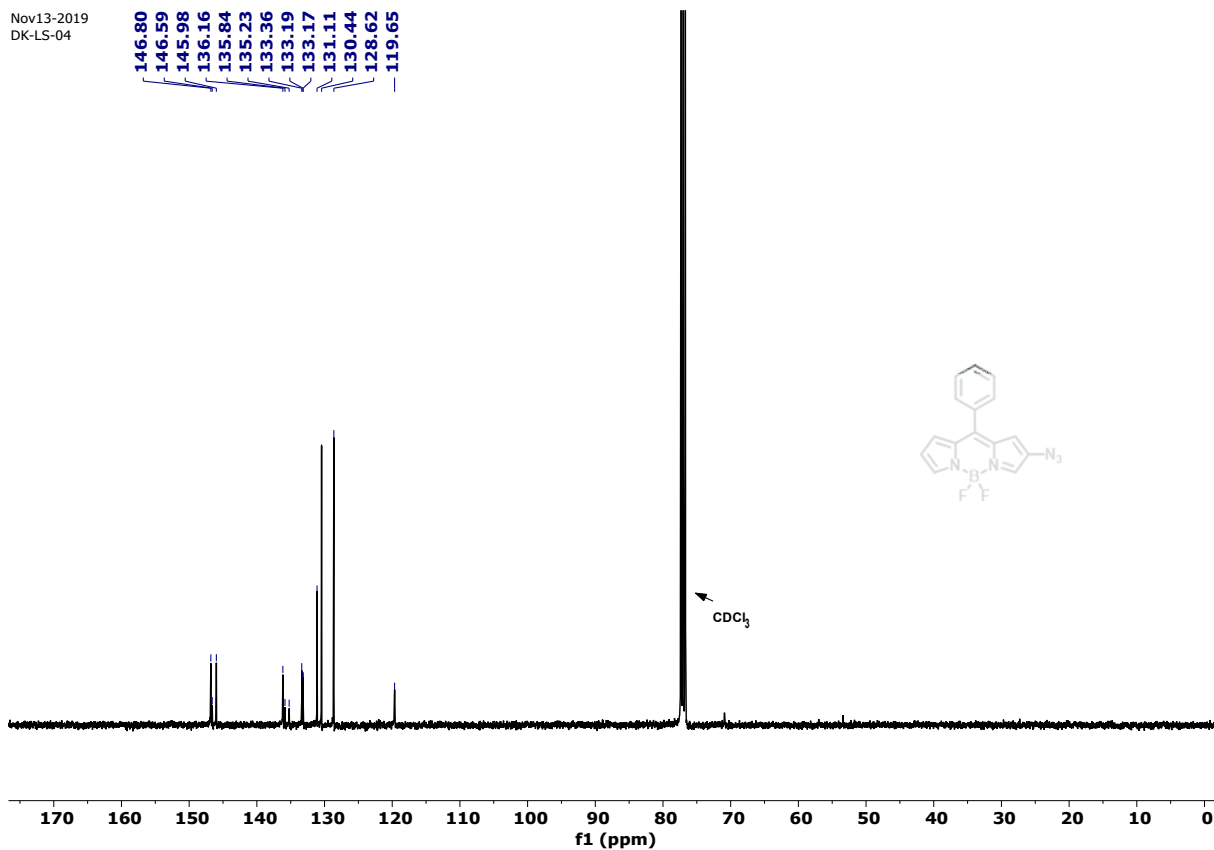

### HRMS spectrum of 5c

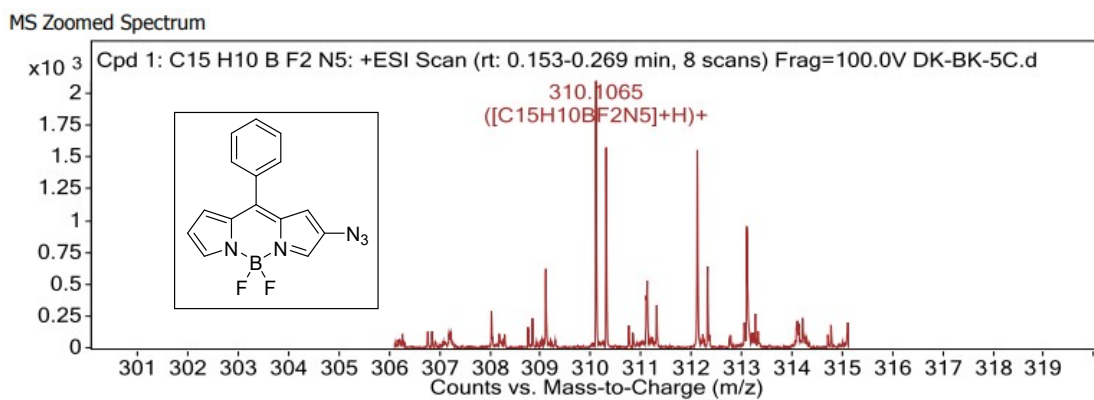

# <sup>1</sup>H NMR spectrum of 5d

May27-2023.2.fid  
DK-PS-BK-5F

8.66  
8.03  
7.94  
7.93  
7.92  
7.81  
7.80  
7.79  
7.78  
7.64  
7.62  
7.60  
7.58  
7.56  
7.02  
7.01  
6.61

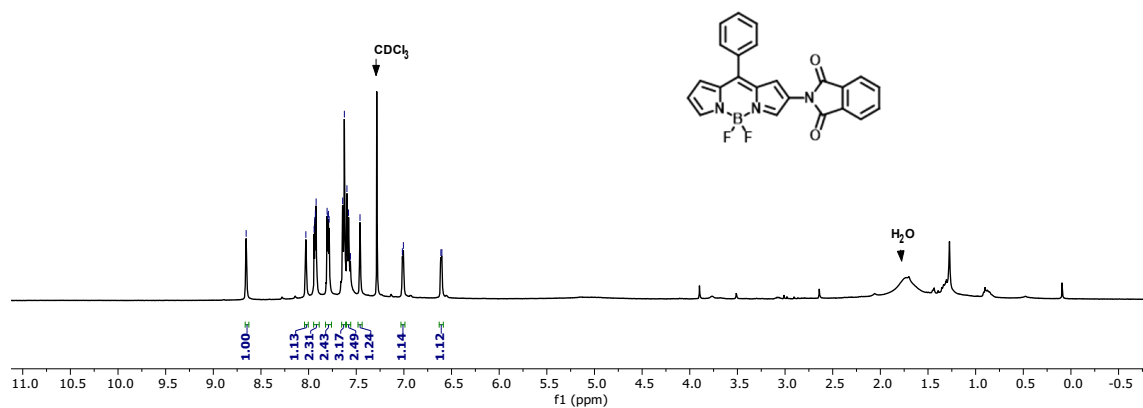

# <sup>13</sup>C NMR spectrum of 5d

May27-2023.363.fid  
DK-PS-BK-5F

166.03  
147.90  
145.45  
136.85  
133.52  
132.40  
131.67  
131.01  
130.56  
128.62  
123.80  
120.60  
119.01

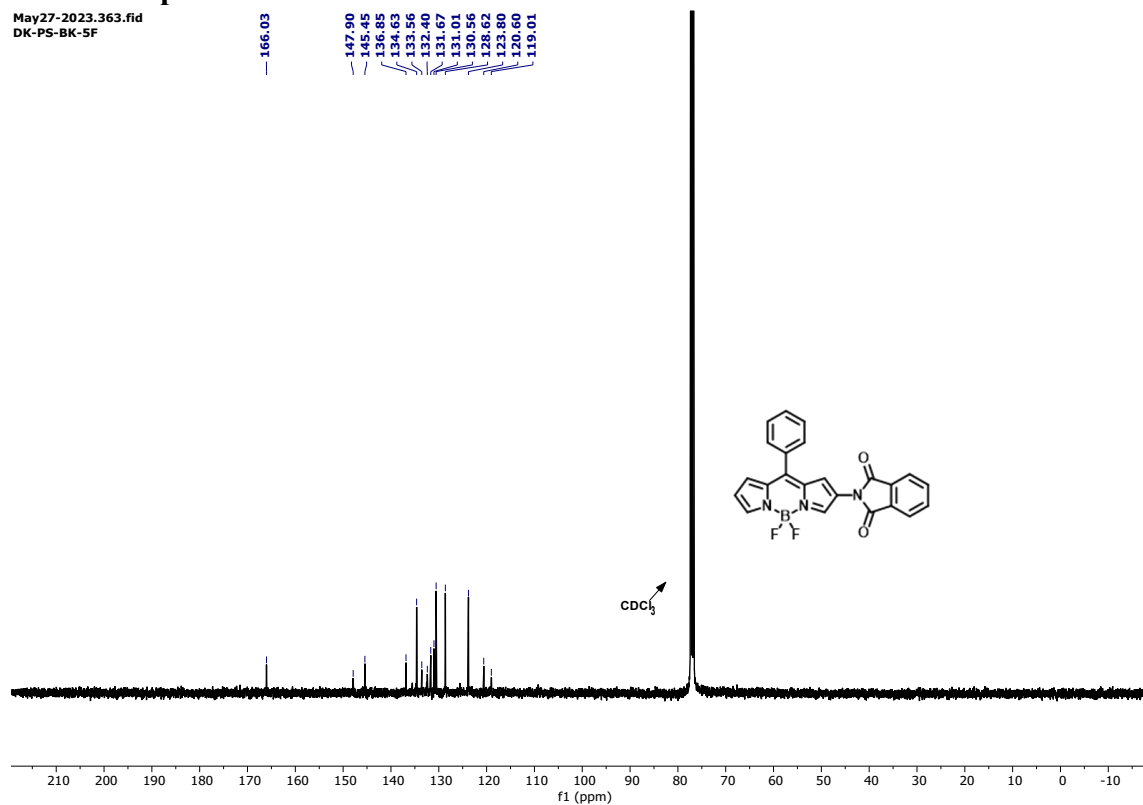

# <sup>19</sup>F NMR spectrum of 5d

May27-2023.364.fid  
DK-PS-BK-5F

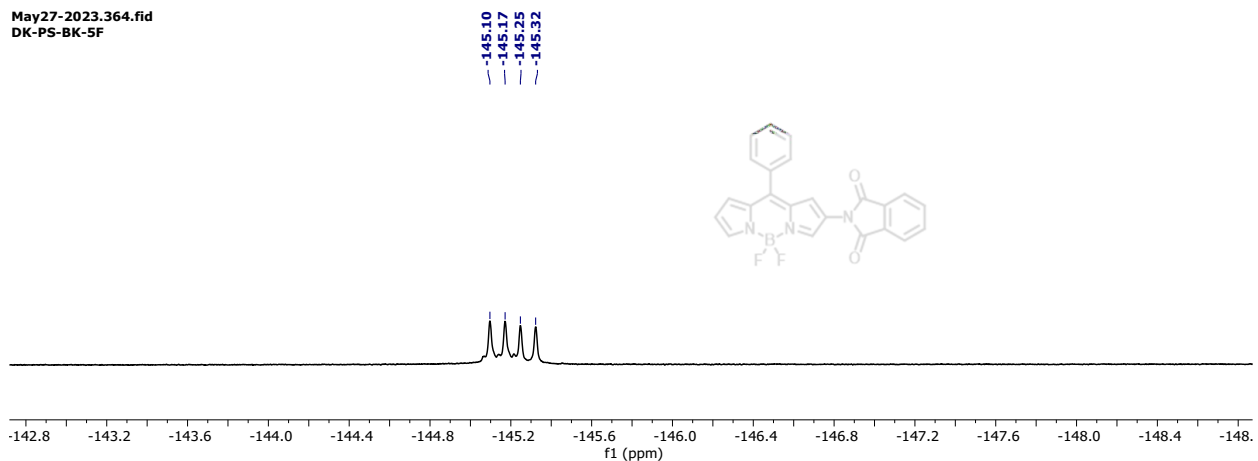

# HRMS spectrum of 5d

MS Zoomed Spectrum

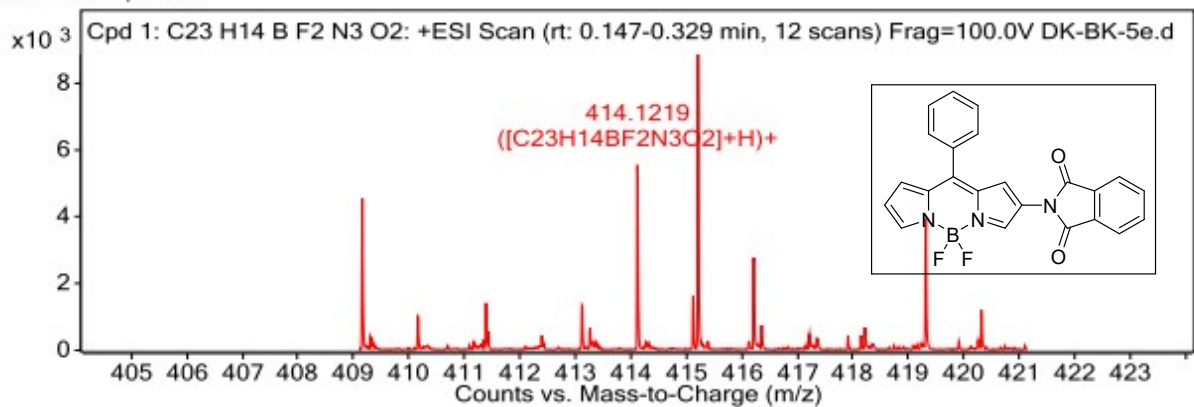

# <sup>1</sup>H NMR spectrum of 5e

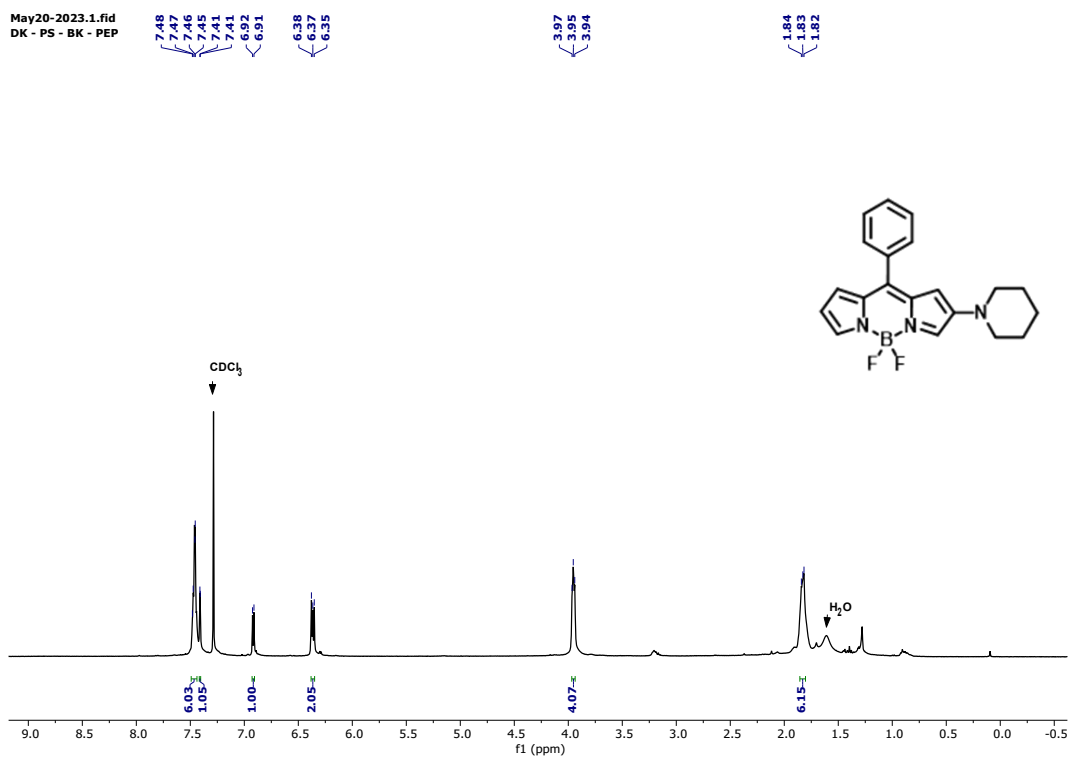

### <sup>13</sup>C NMR spectrum of 5e

13C piperidine.332.fid  
DK - PS - BK - PEP

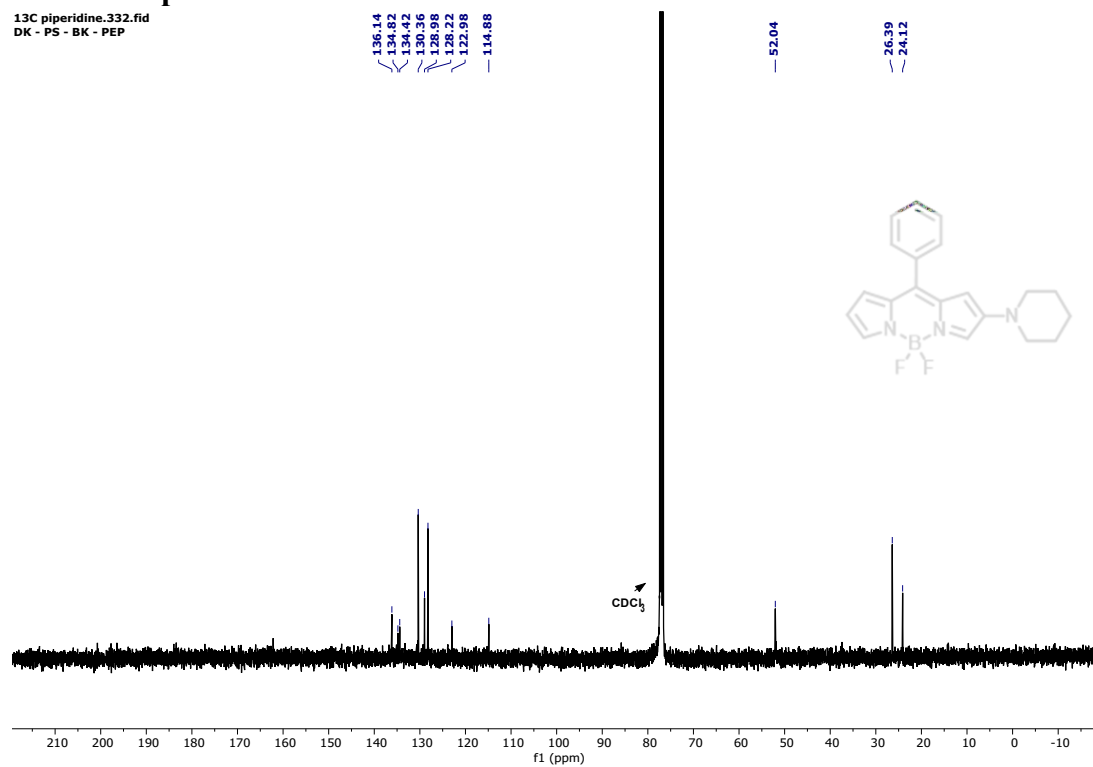

### <sup>19</sup>F NMR spectrum of 5e

May20-2023.2.fid  
DK - PS - BK - PEP

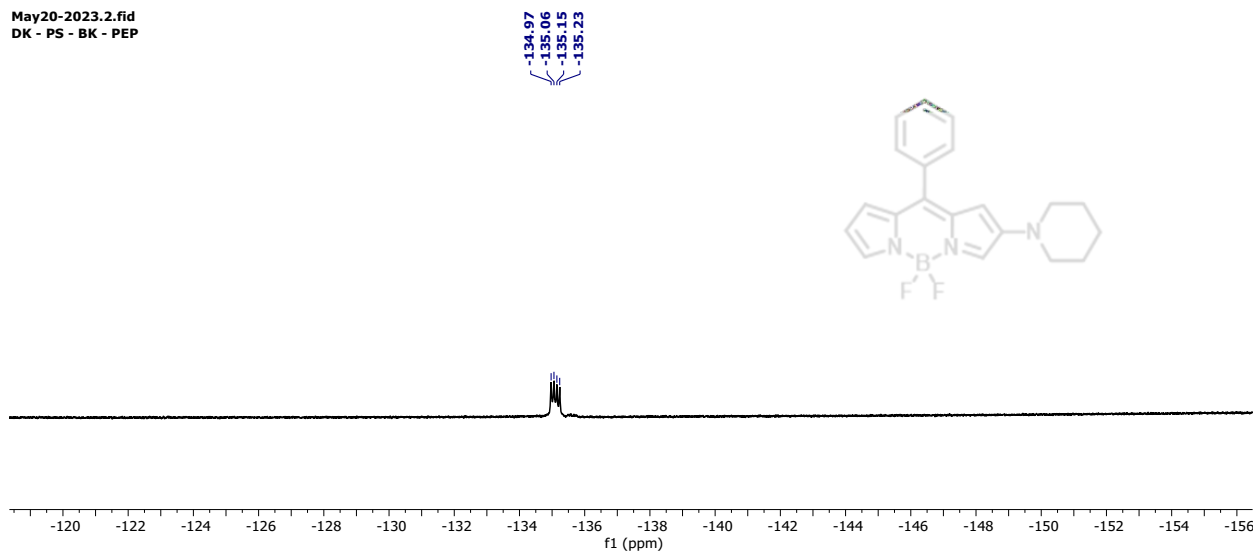

### HRMS spectrum of 5e



### MS Zoomed Spectrum

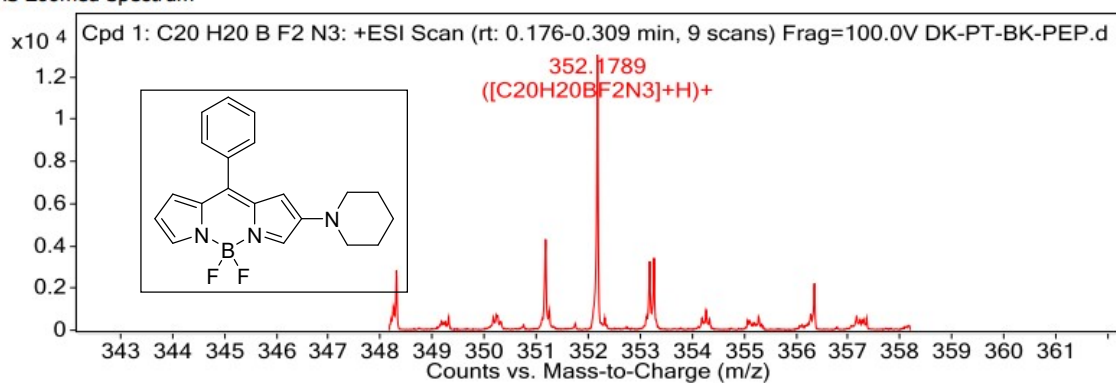

### <sup>1</sup>H NMR spectrum of 5f

Jan16-2023.3.fid  
DK-PS-TC

7.48

6.90

6.35

6.30

6.29

3.96

3.95

3.93

1.83

1.82

1.81

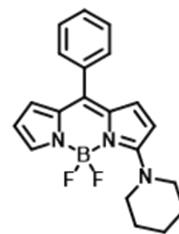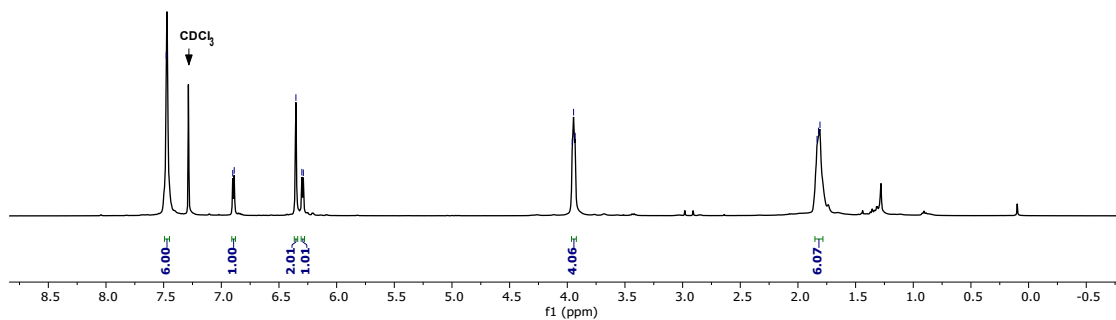

### <sup>13</sup>C NMR spectrum of 5f

100.100.fid  
DK-PS-TC

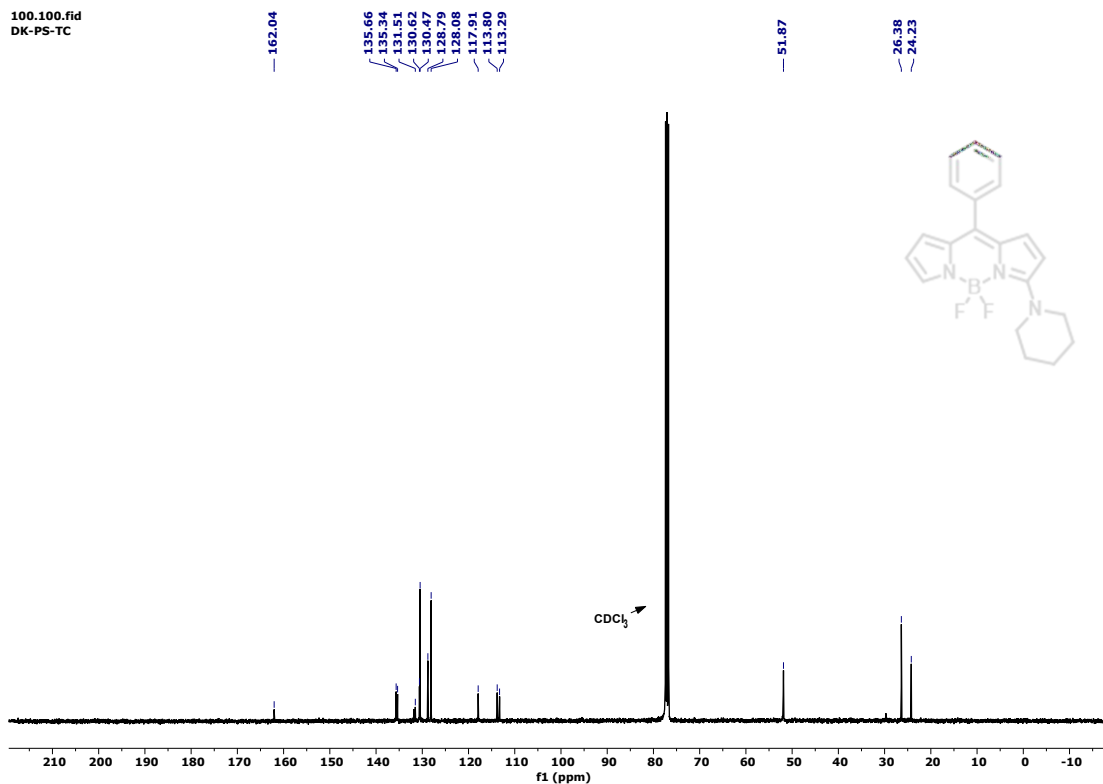

### HRMS spectrum of 5f

MS Zoomed Spectrum

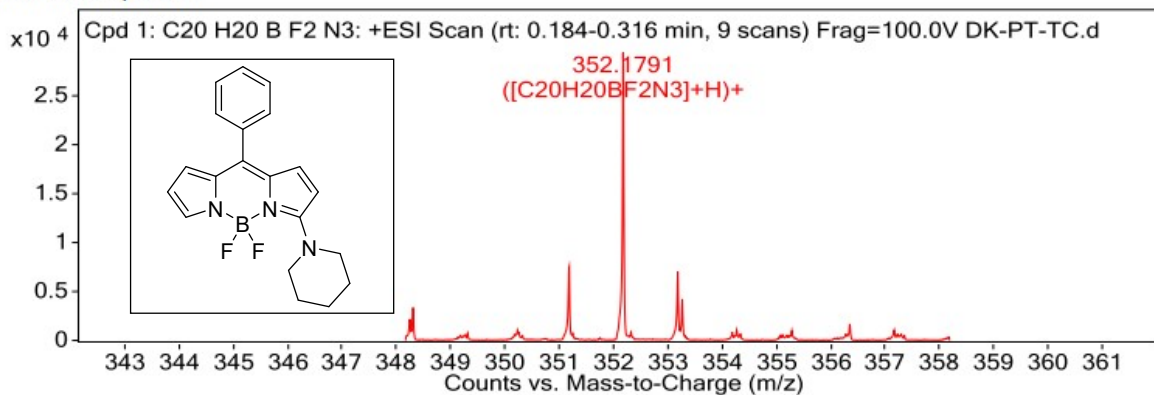

### <sup>1</sup>H NMR spectrum of 5g

May31-2023.4.fid  
DK-PS-BK-5T

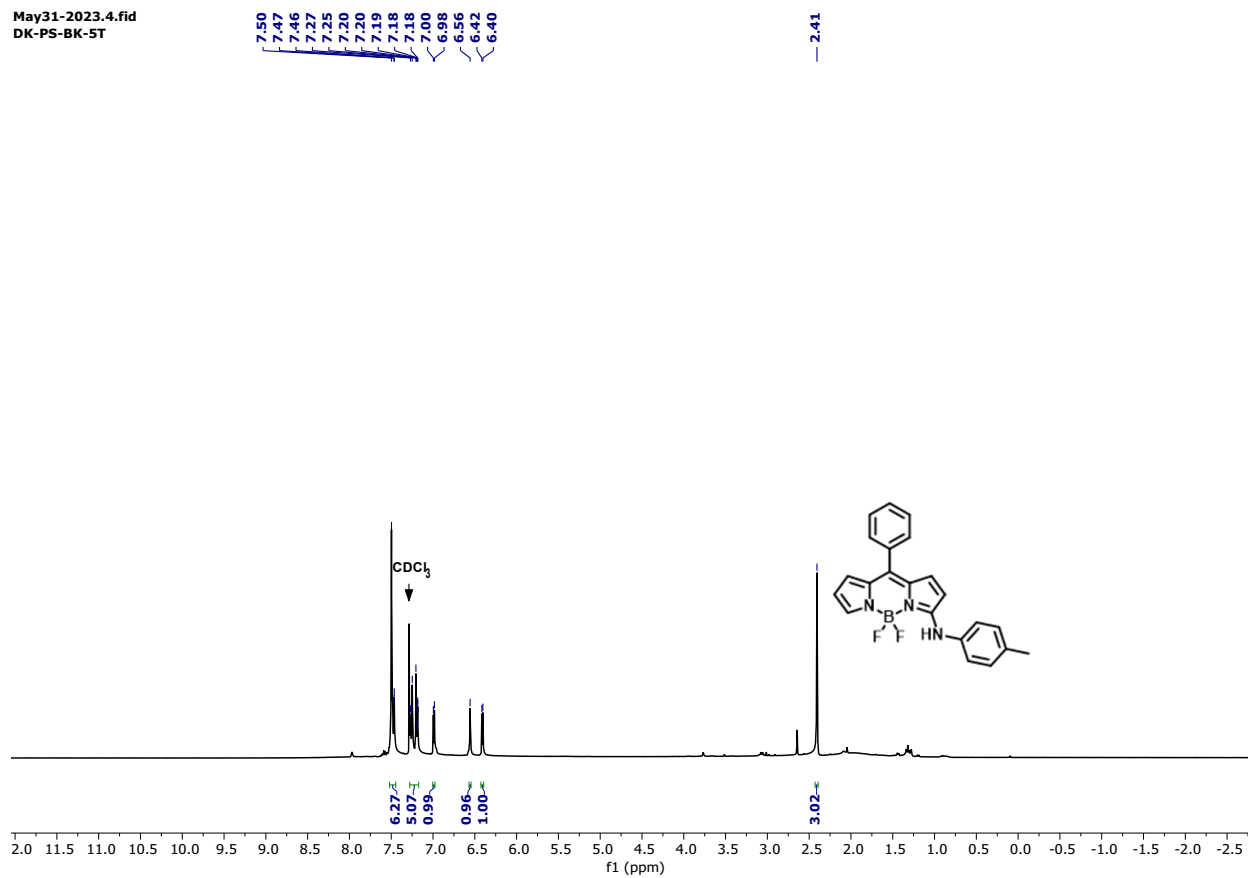

<sup>13</sup>C NMR spectrum of 5g

Jun06-2023.100.fid  
DK-PS-BK-5T

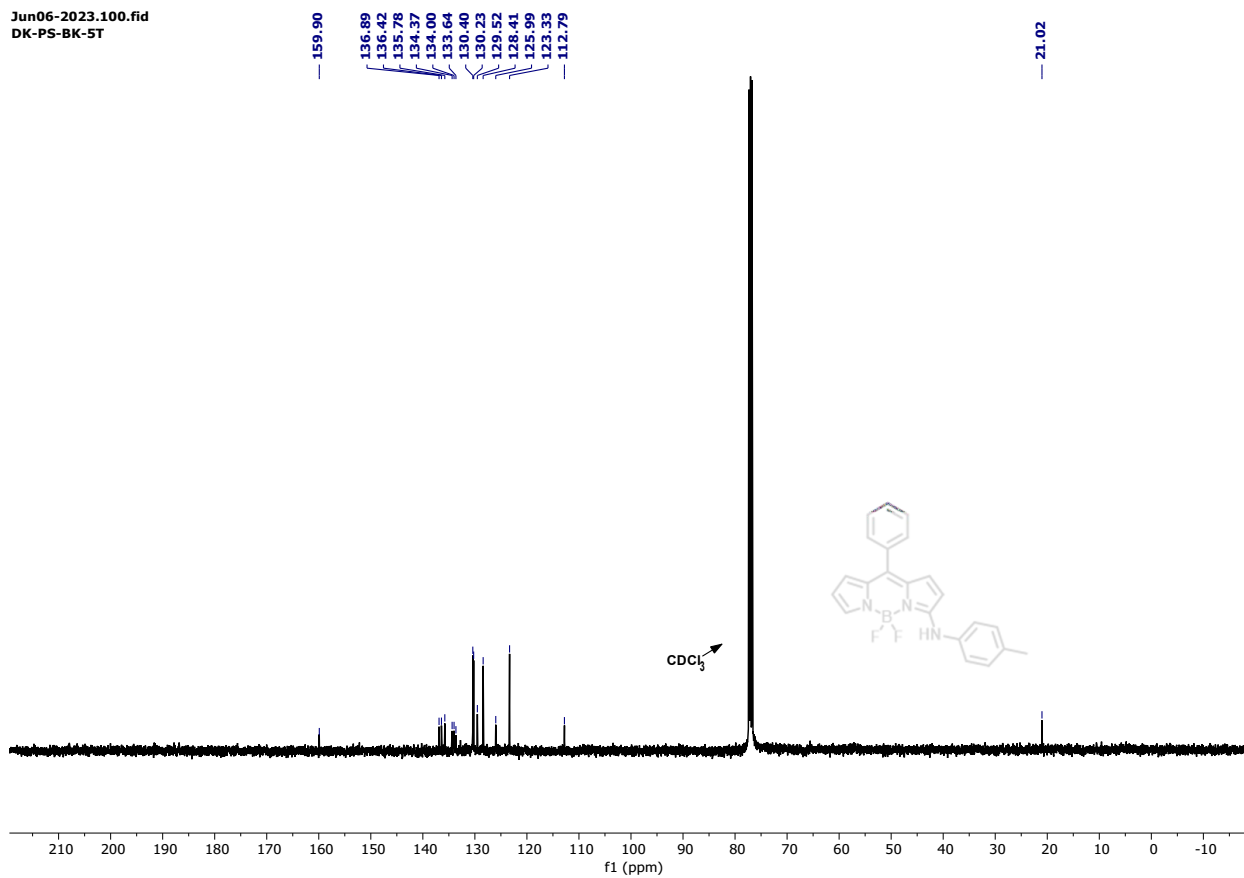

### <sup>19</sup>F NMR spectrum of 5g

Jun06-2023.101.fid  
DK-PS-BK-5T

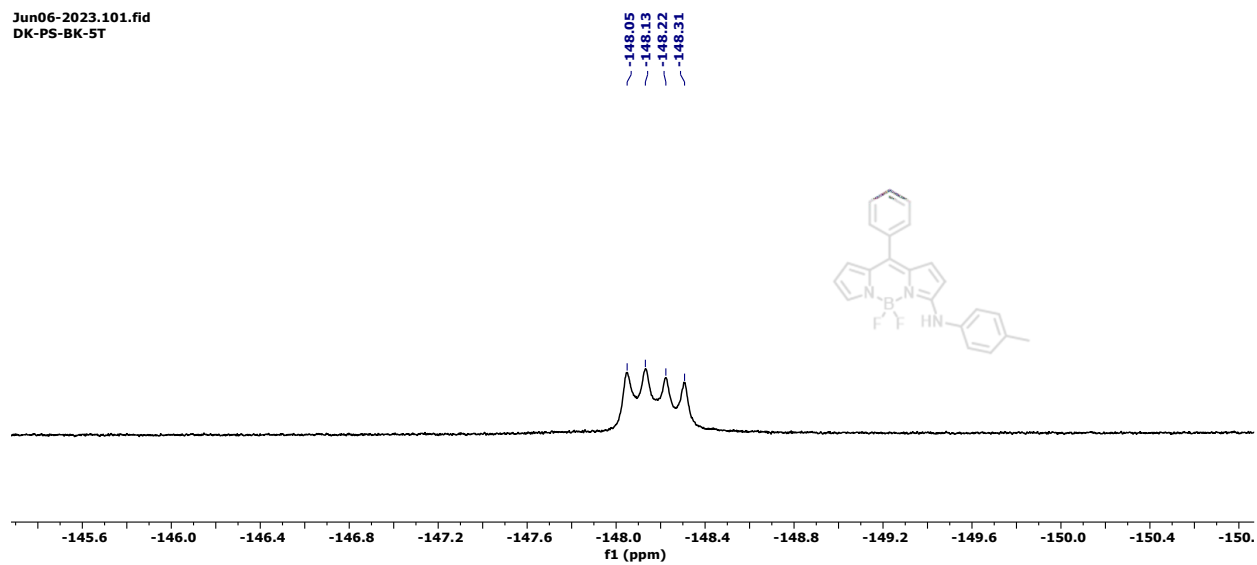

### HRMS spectrum of 5g

MS Zoomed Spectrum

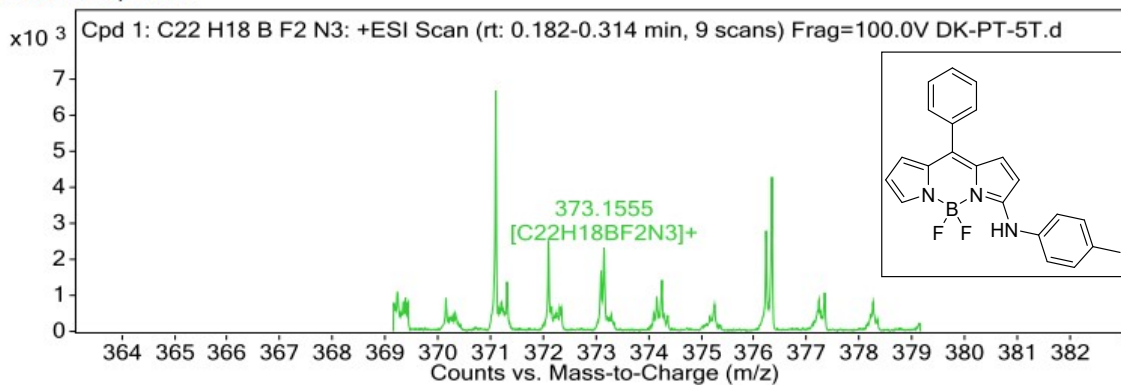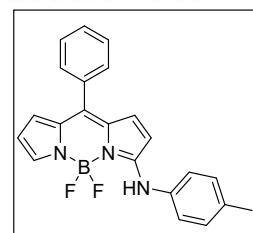

<sup>1</sup>H NMR spectrum of 5h

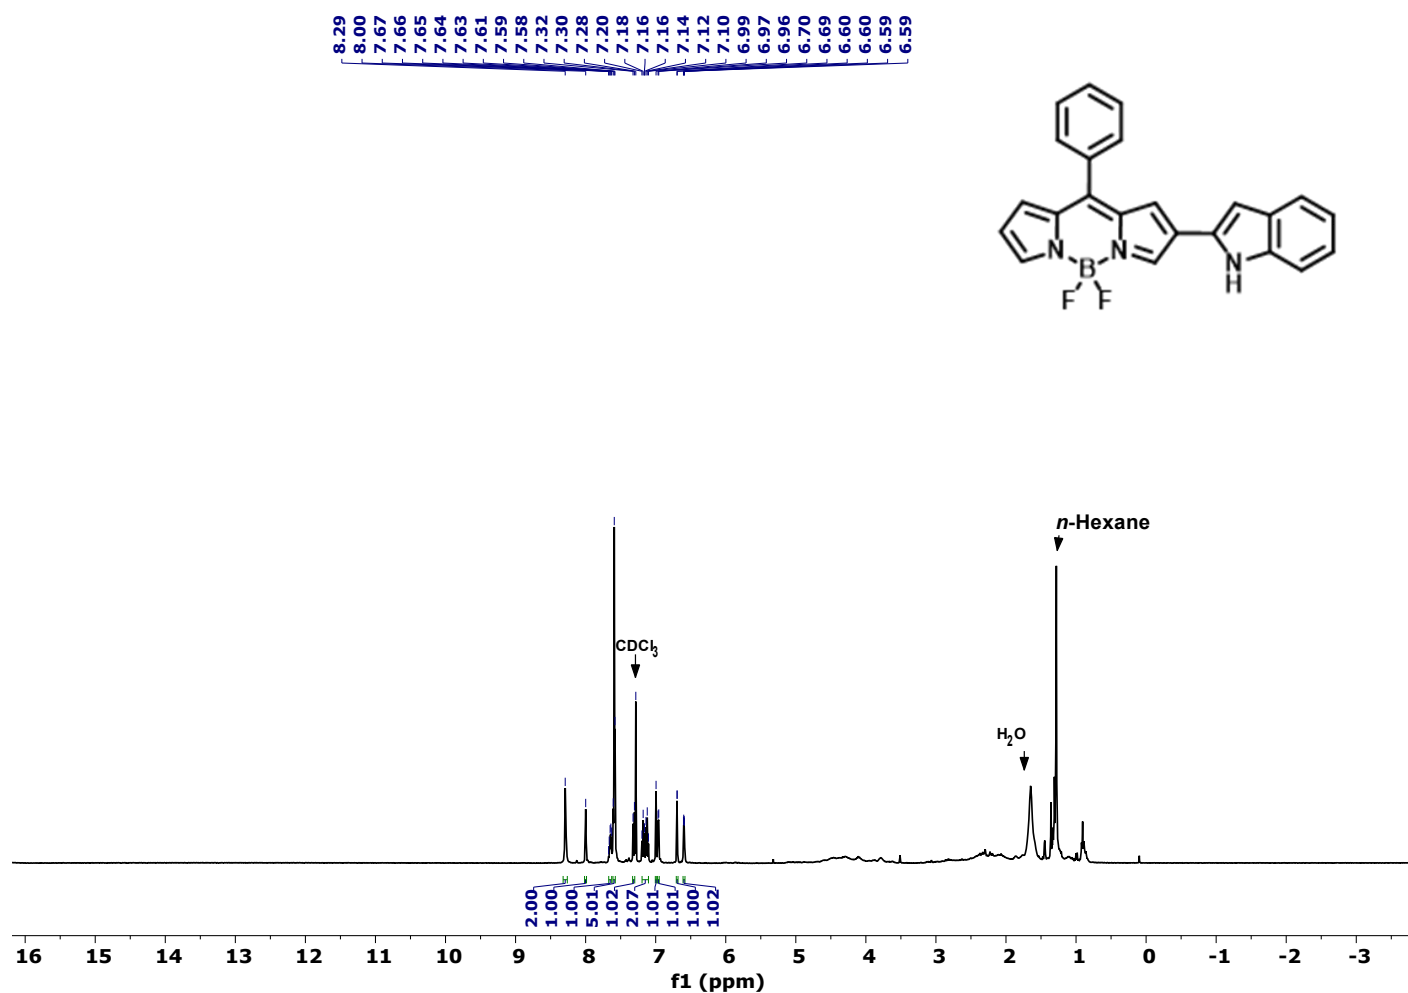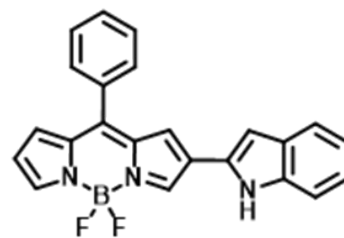

### <sup>13</sup>C NMR spectrum of 5h

Jul22-2020  
DK-BK-A-08

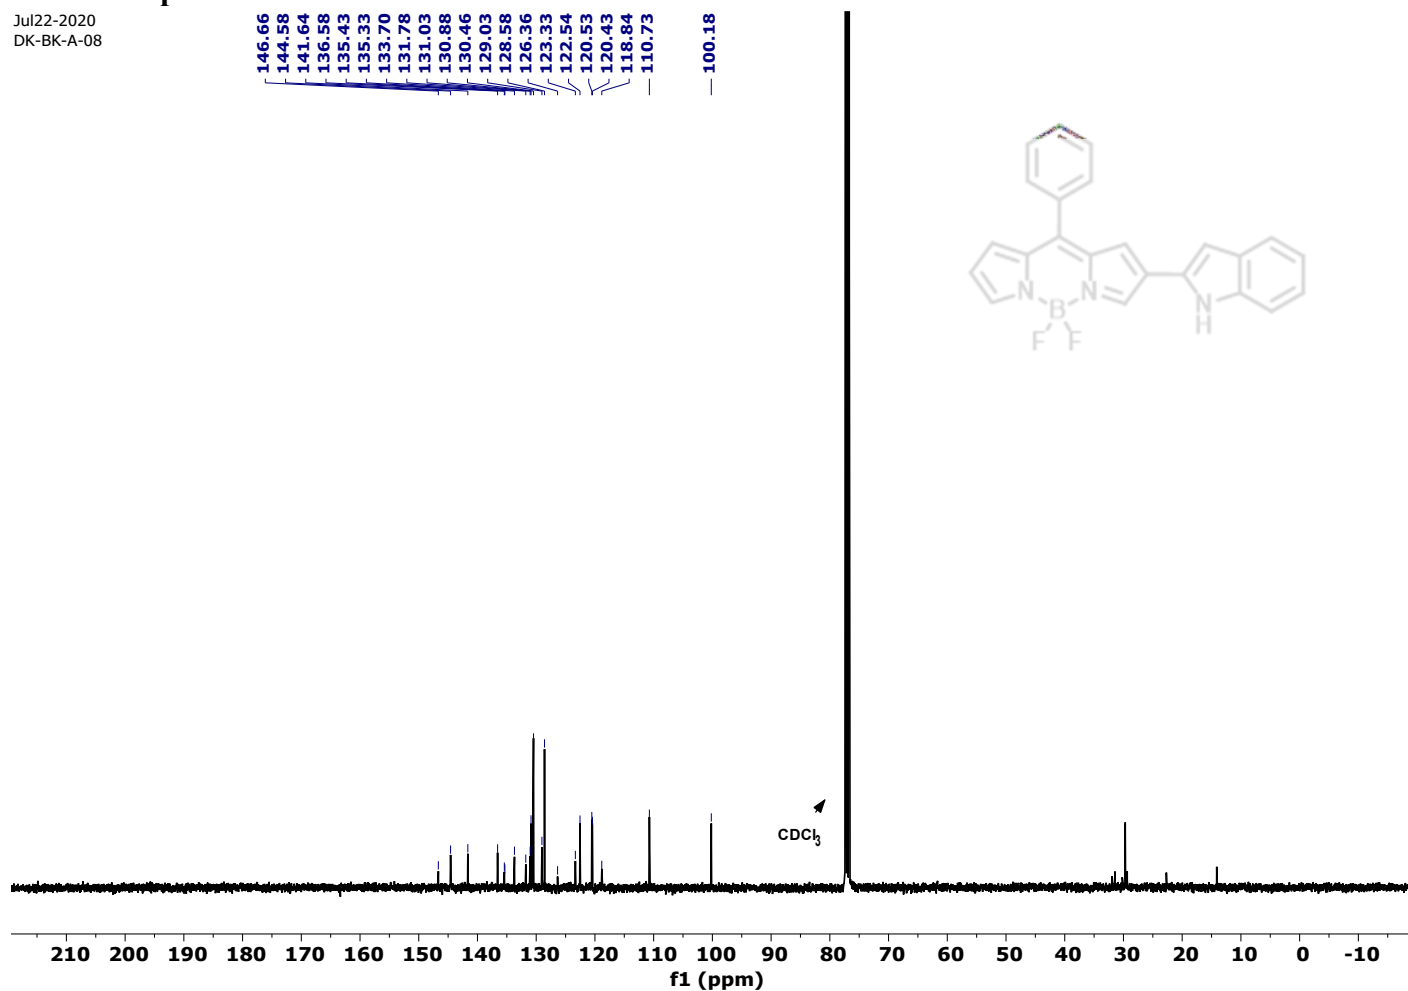

### HRMS spectrum of 5h

MS Zoomed Spectrum

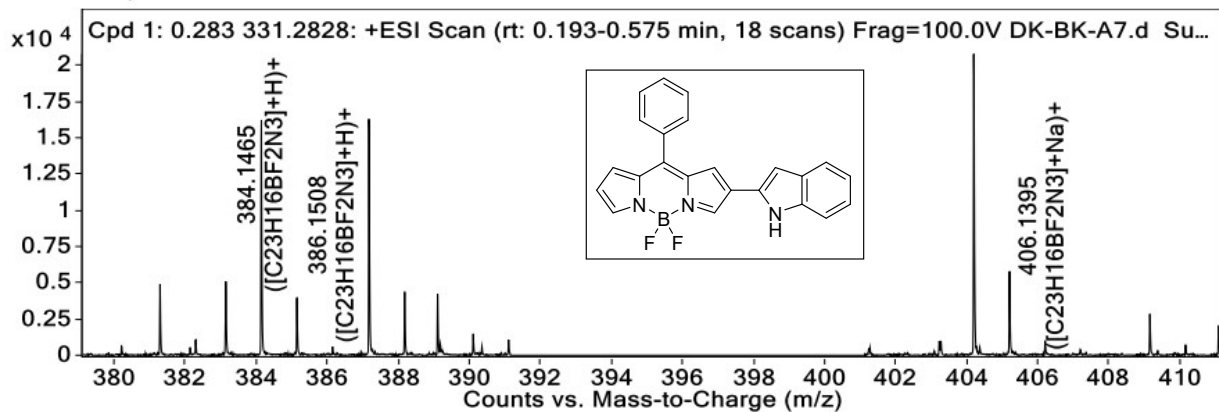

# <sup>1</sup>H NMR spectrum of 5i

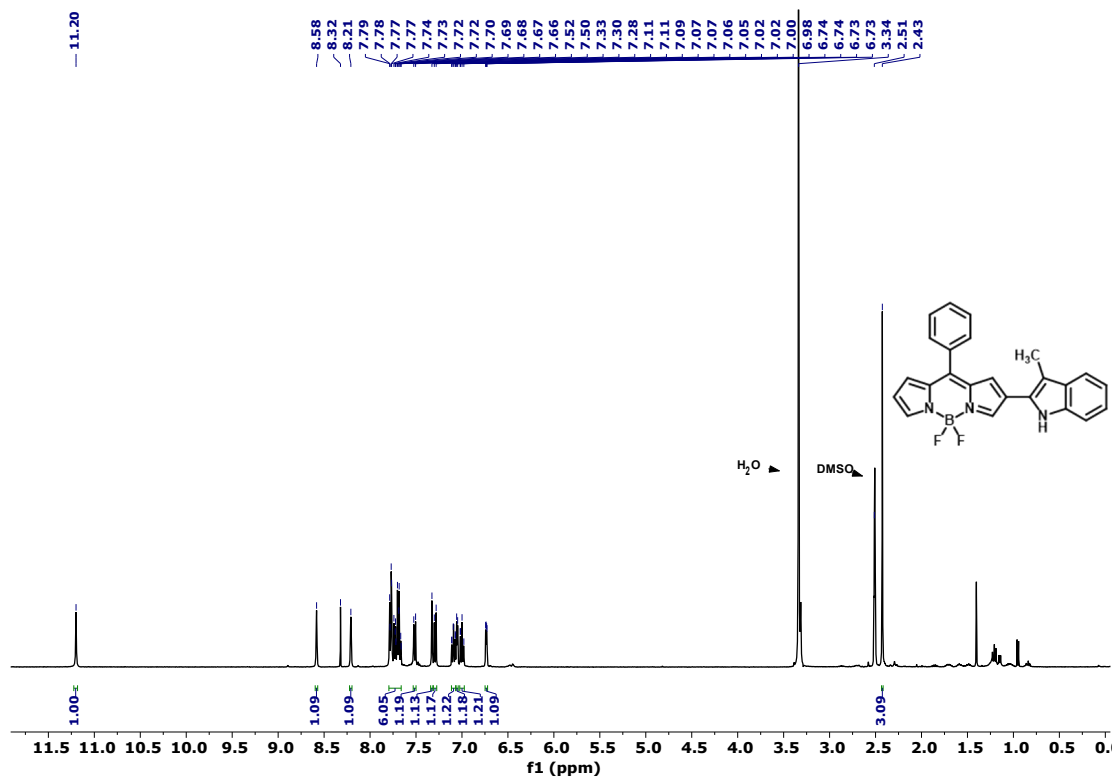

# <sup>13</sup>C NMR spectrum of 5i

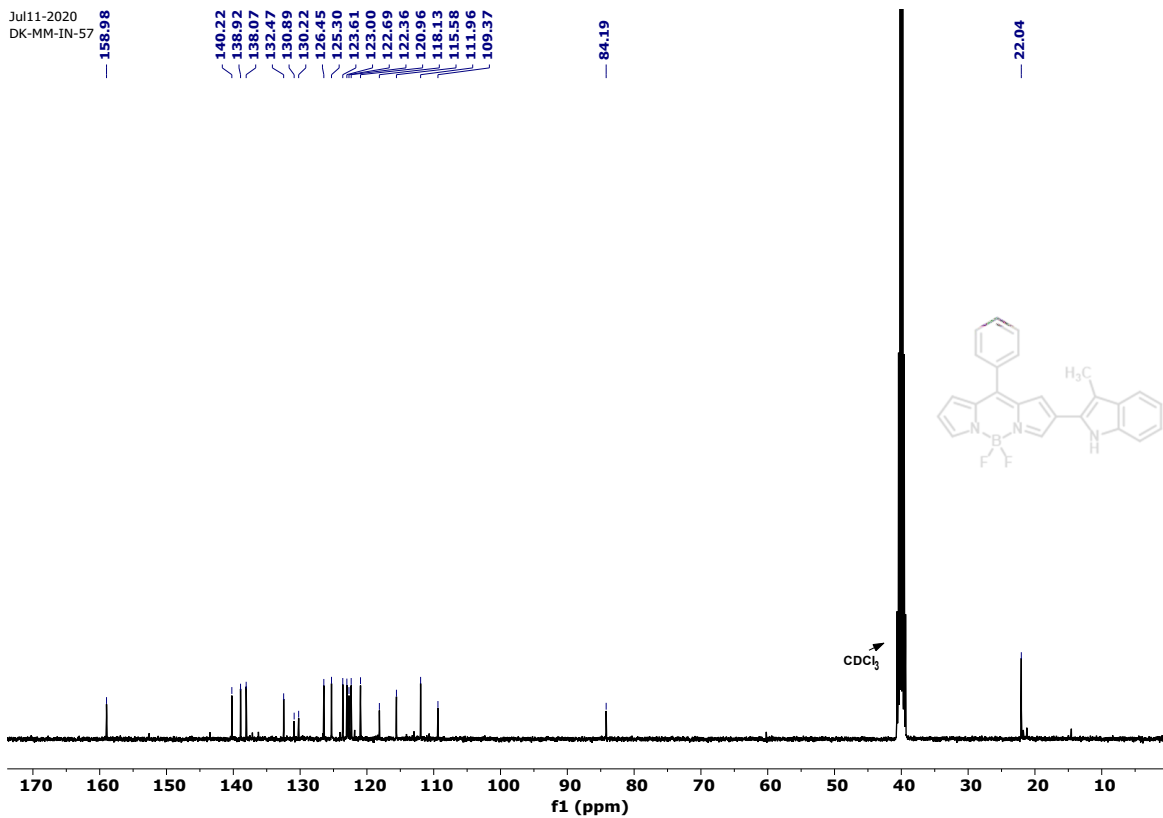

## HRMS spectrum of 5i

MS Zoomed Spectrum

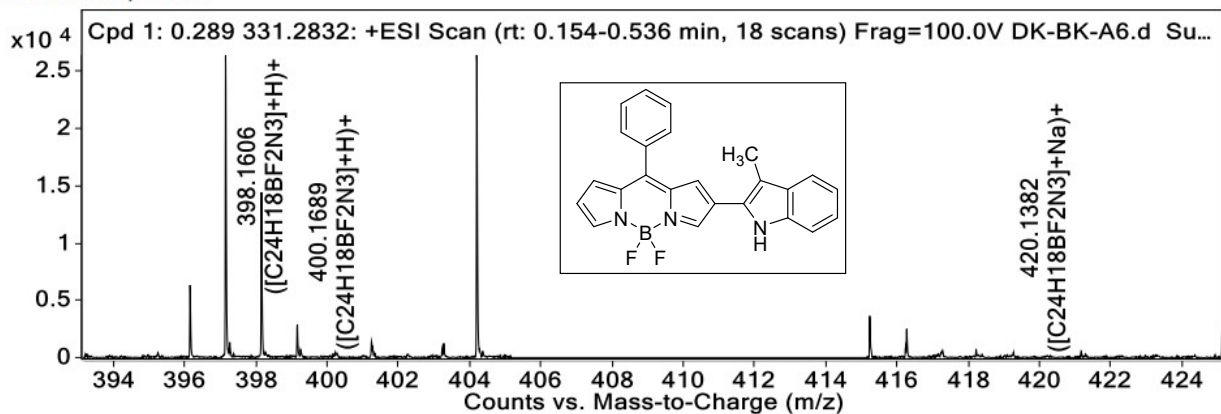

## <sup>1</sup>H NMR spectrum of 5j



Jul11-2023.1.fid  
DK-PS-ACRY

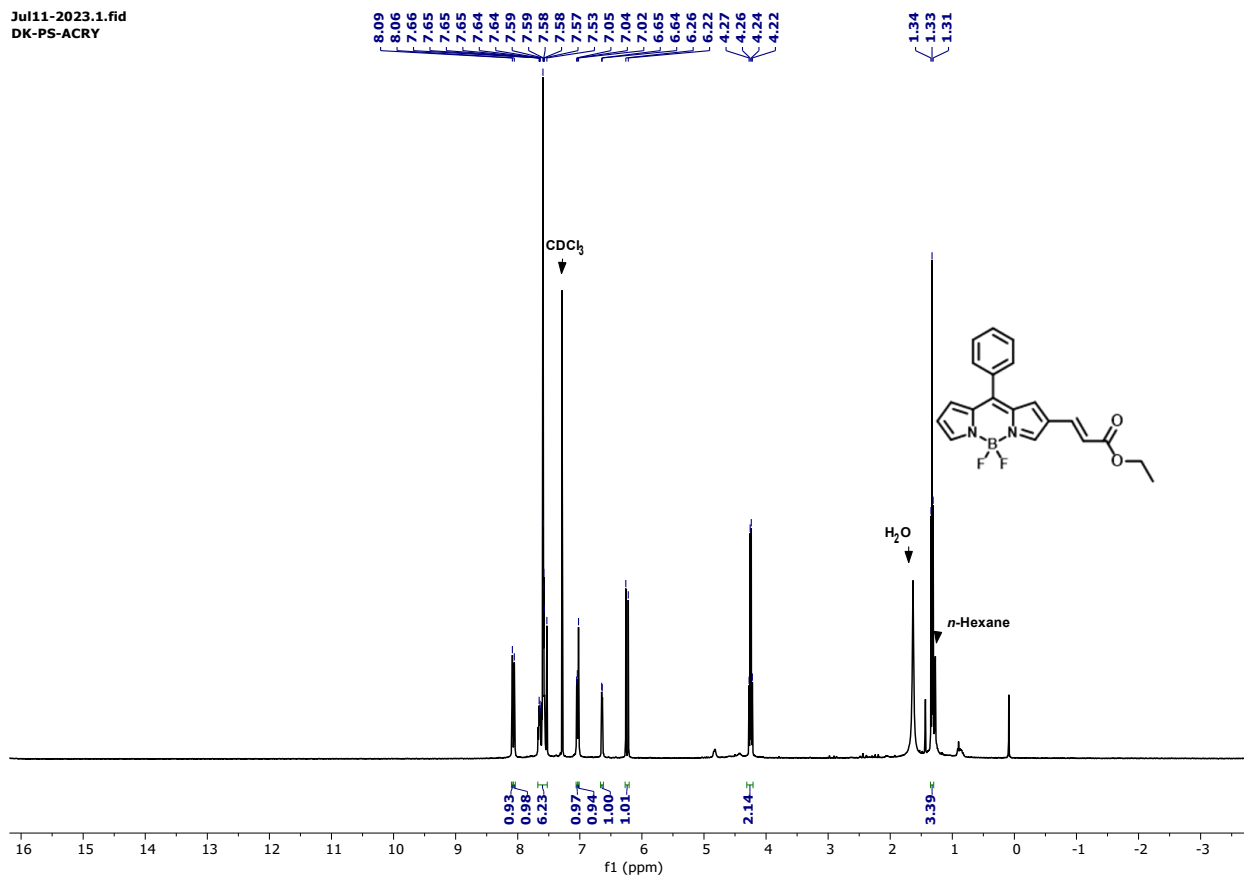

<sup>13</sup>C NMR spectrum of 5j

Jul12-2023.100.fid  
DK-PS-ACRY

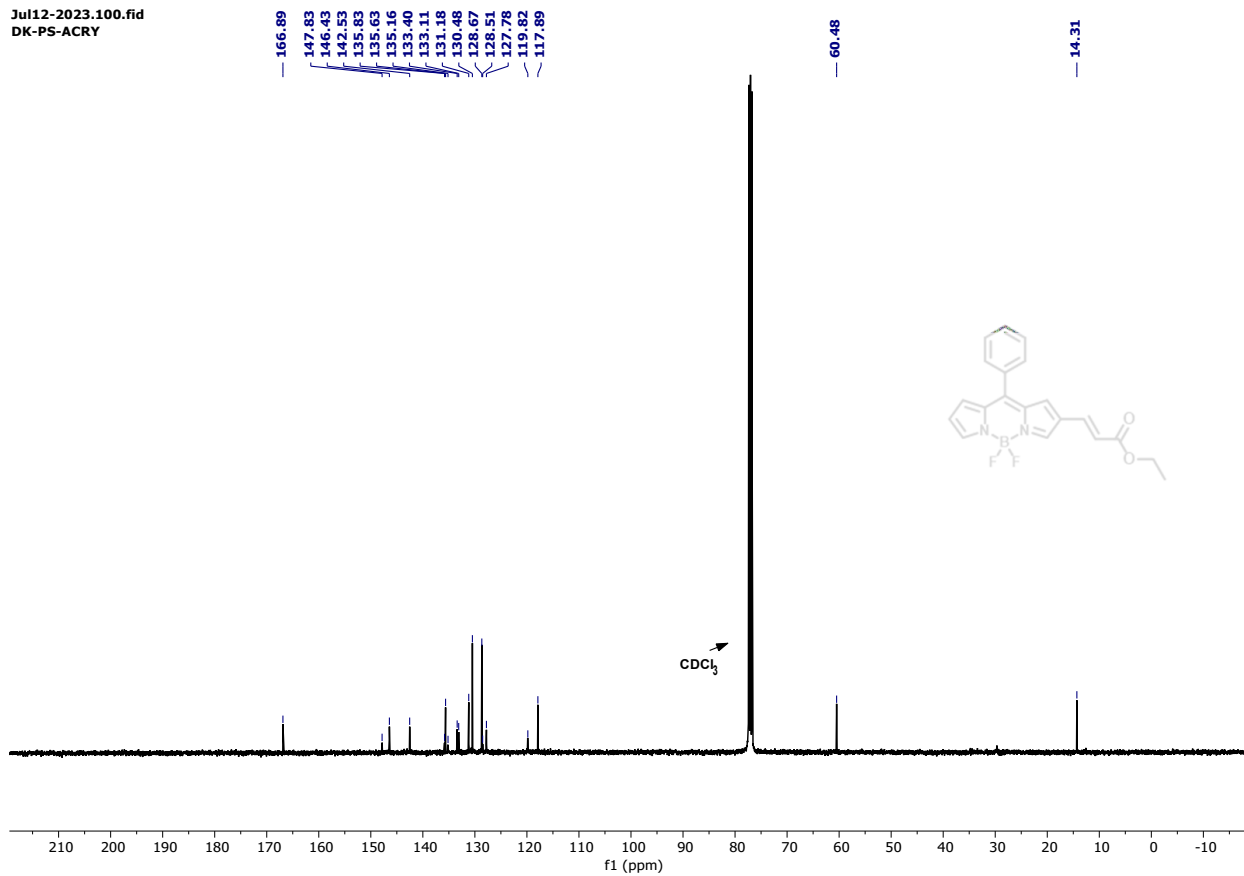

### <sup>19</sup>F NMR spectrum of 5j

Jul12-2023.1.fid  
DK-PS-ACRY

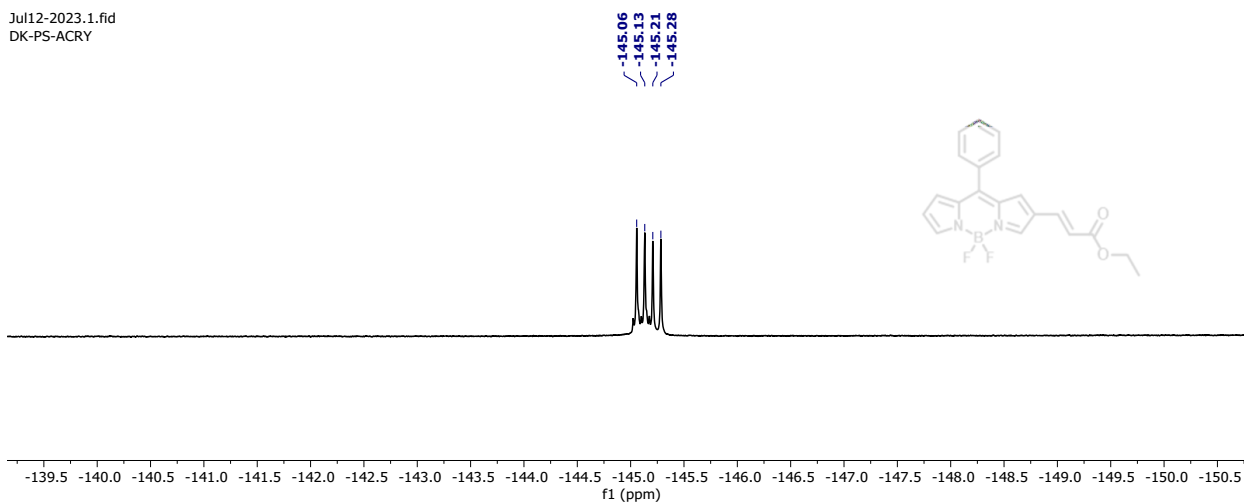

### HRMS spectrum of 5j

### MS Zoomed Spectrum

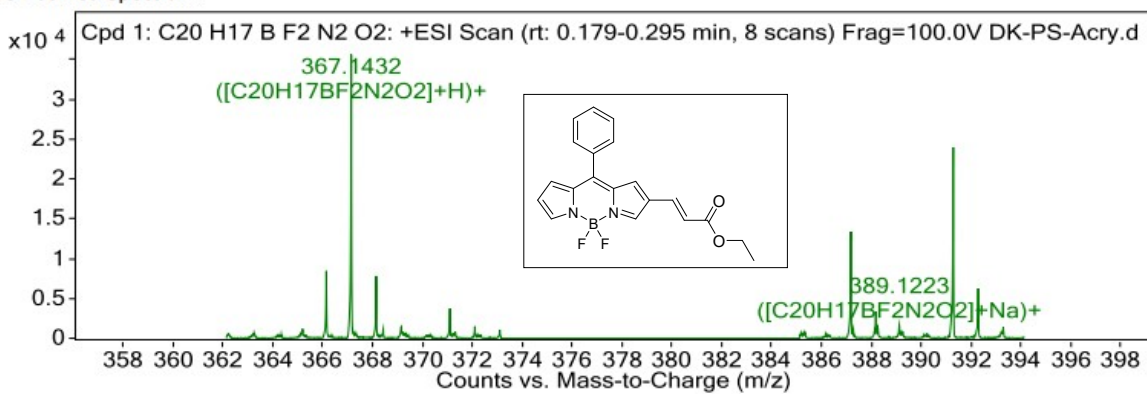

### <sup>1</sup>H NMR spectrum of 5k

Sep01-2020  
DK-BK-A-9

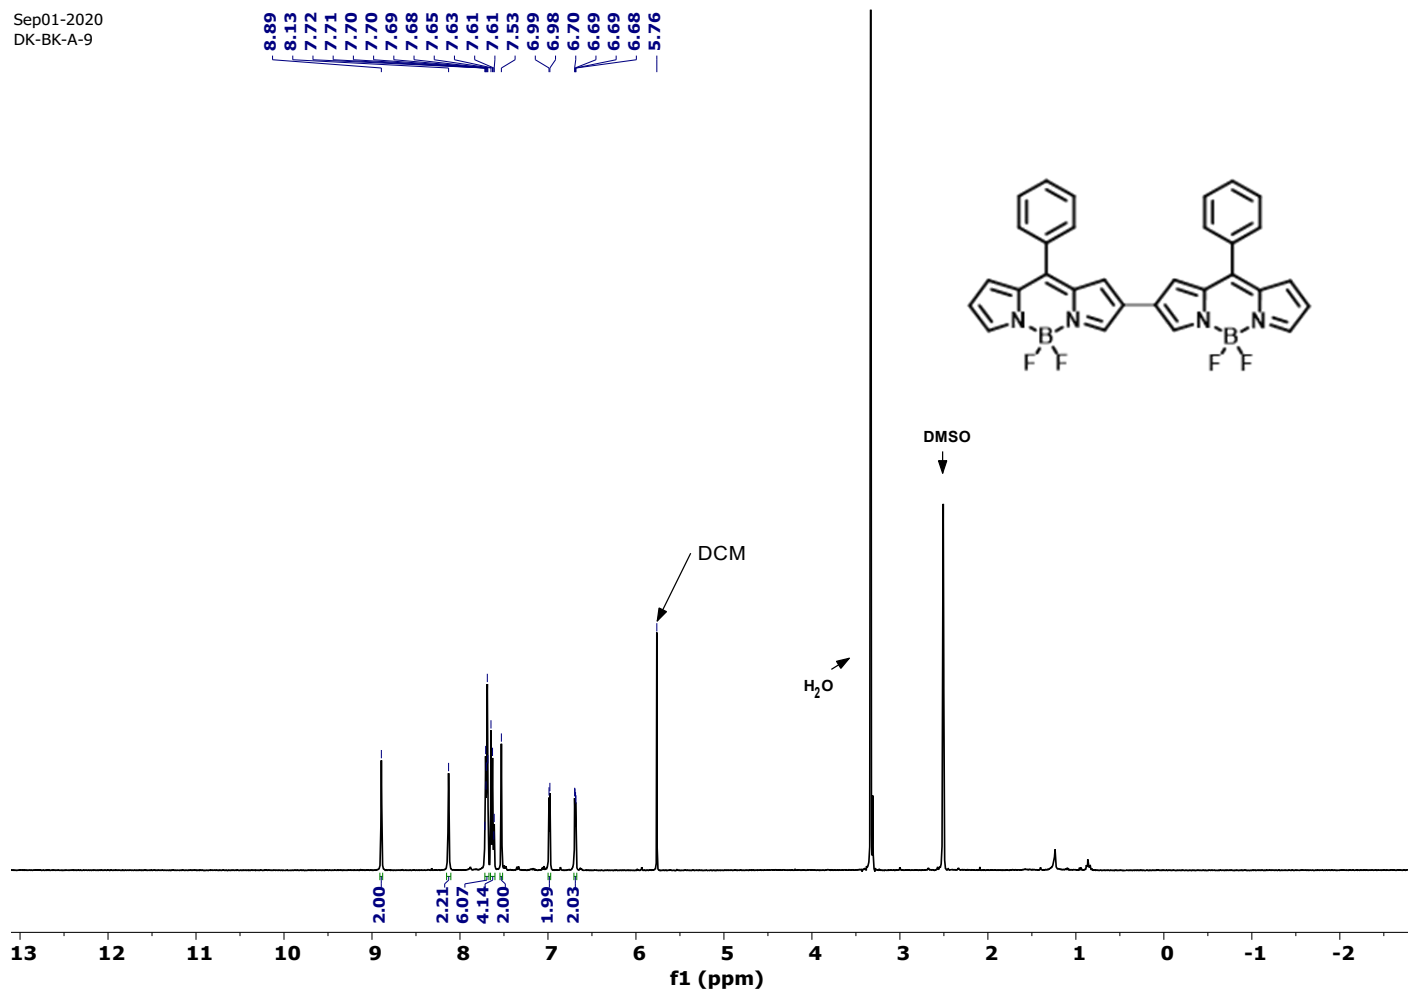

### <sup>13</sup>C NMR spectrum of 5k

Sep01-2020  
DK-BK-A-9

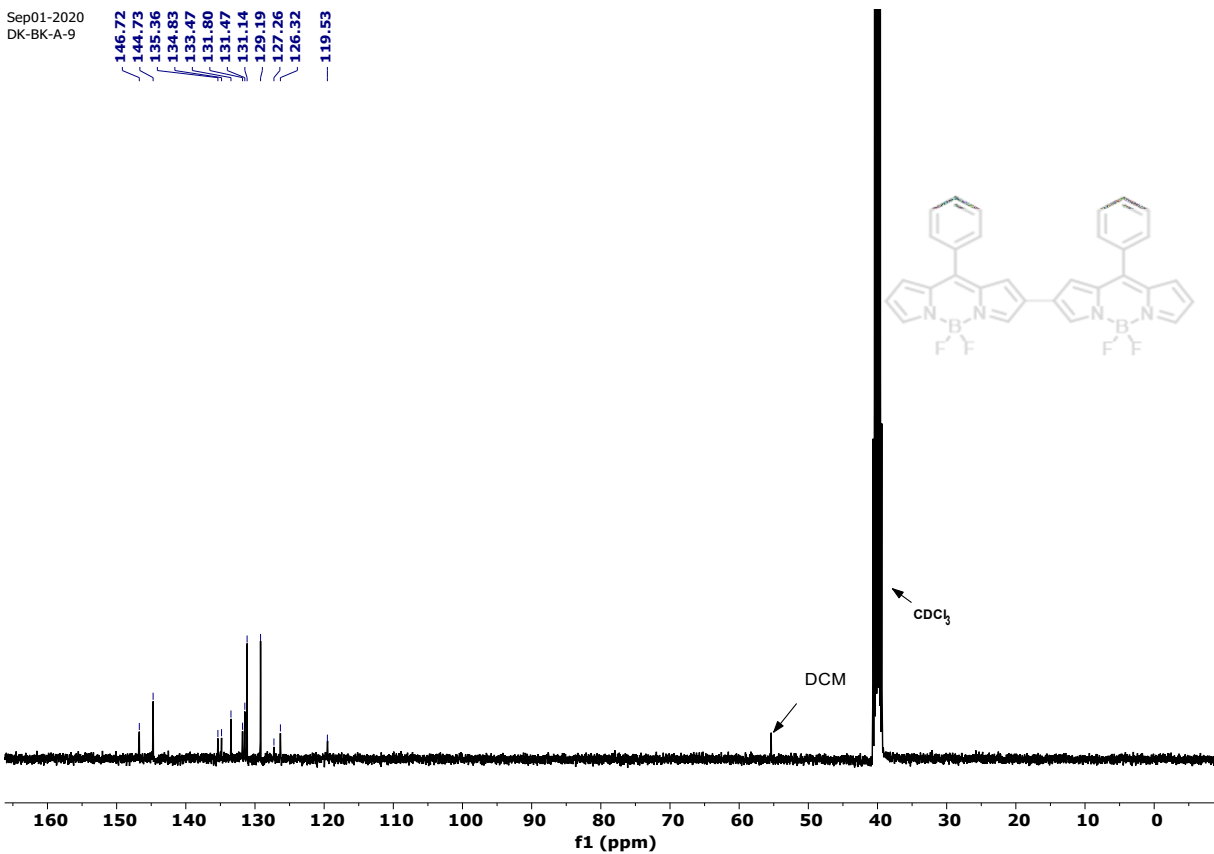

### <sup>19</sup>F NMR spectrum of 5k

Sep10-2020  
DK-BK-A9

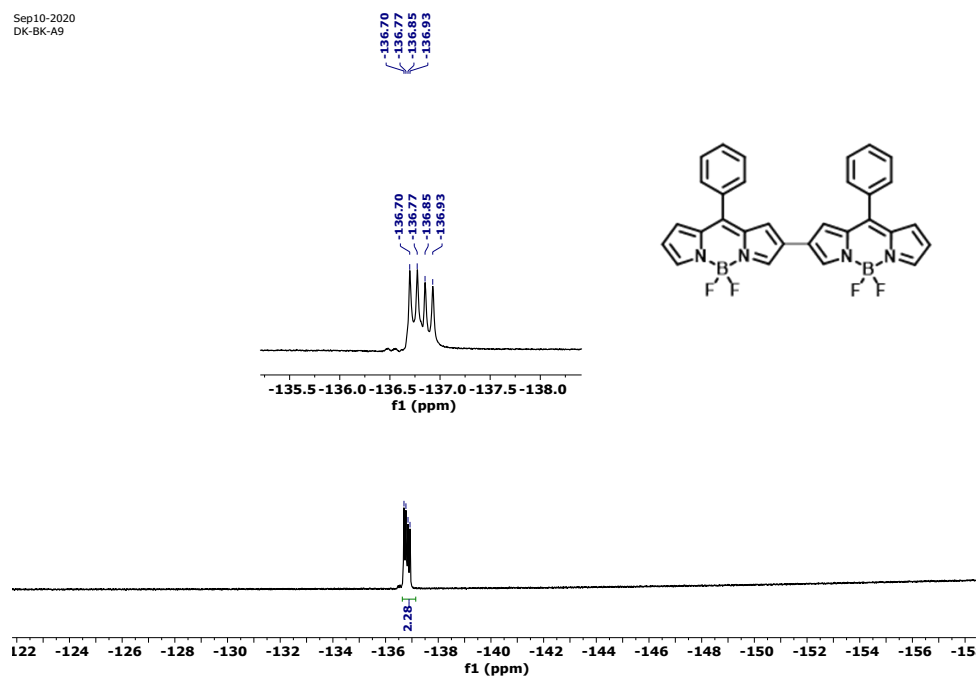

### HRMS spectrum of 5k

MS Zoomed Spectrum

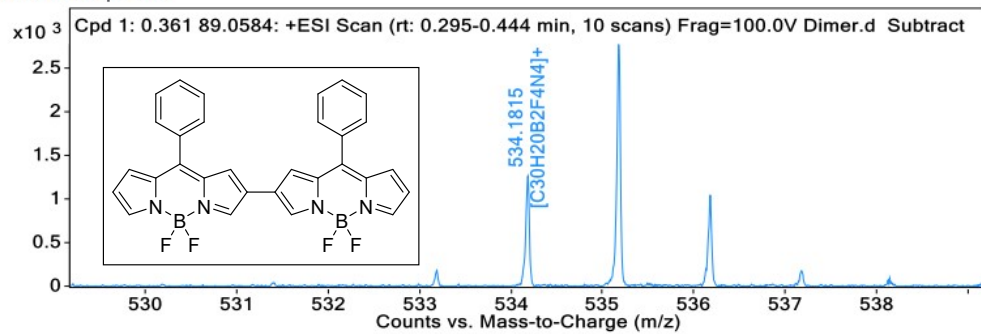

<sup>1</sup>H NMR spectrum of 5l

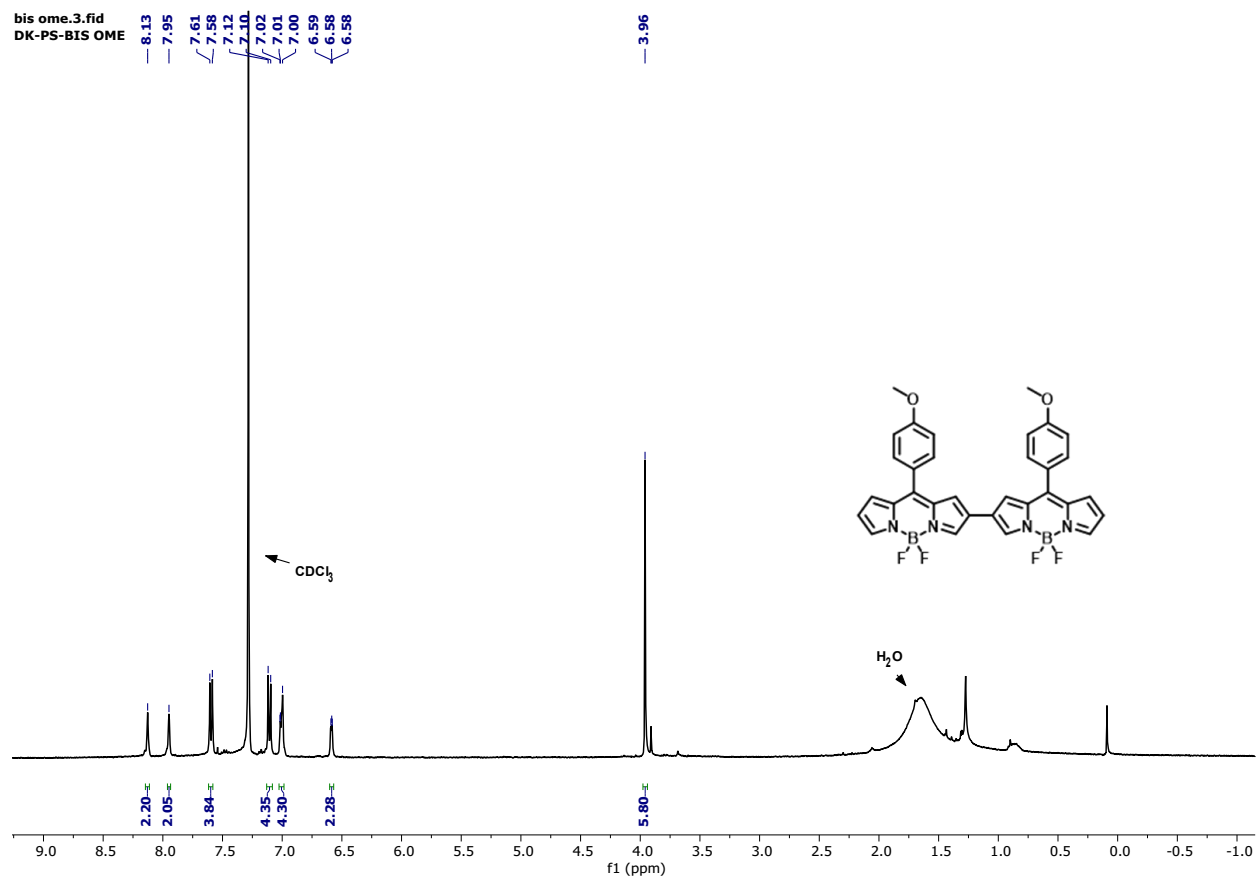

# <sup>13</sup>C NMR spectrum of 5l

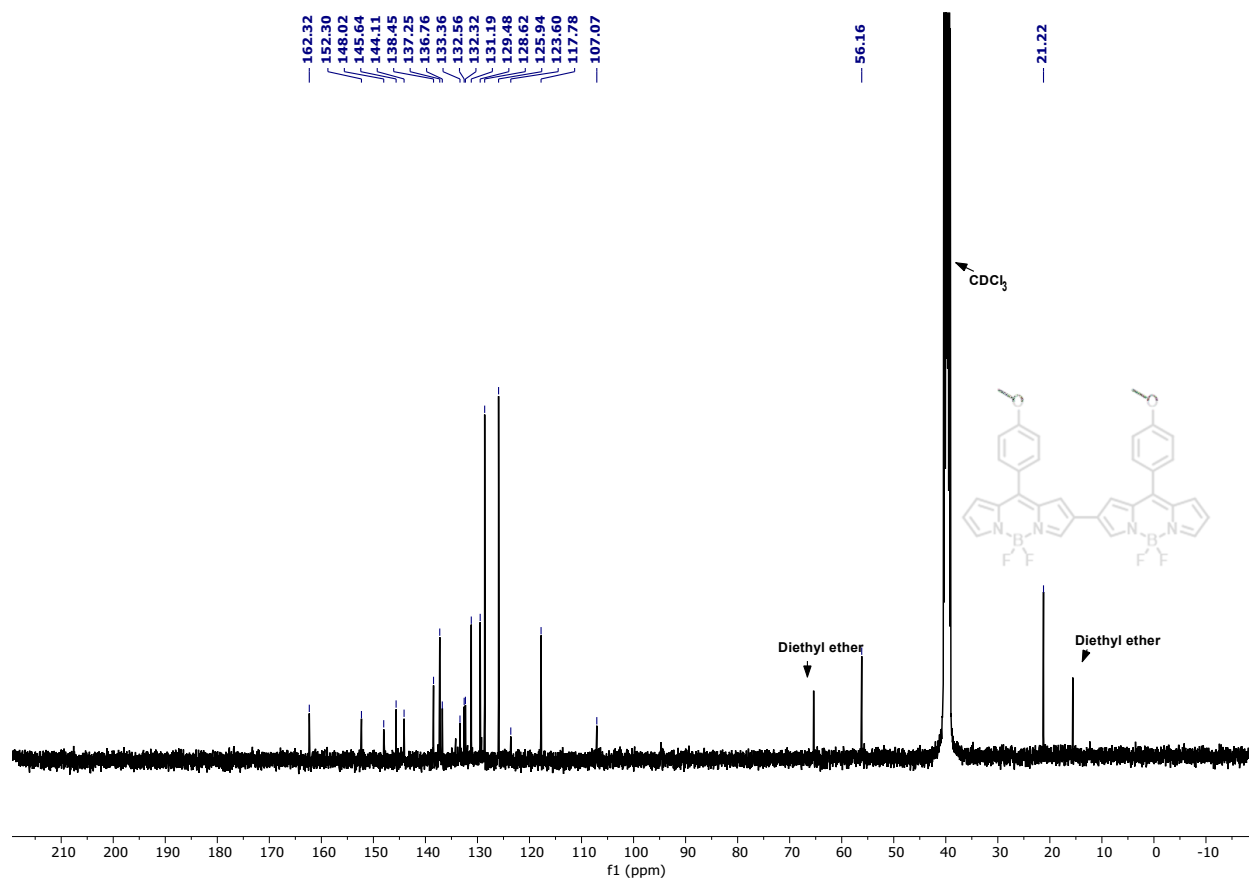

# <sup>19</sup>F NMR spectrum of 5l

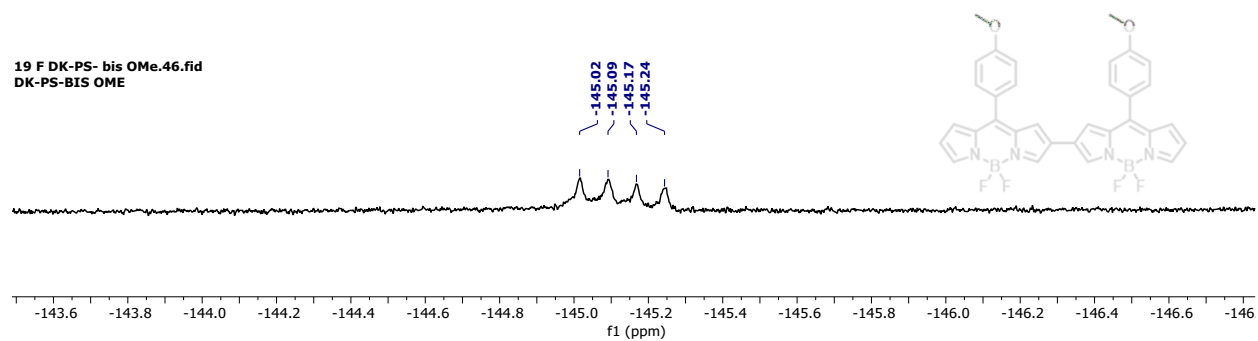

## HRMS spectrum of 5i

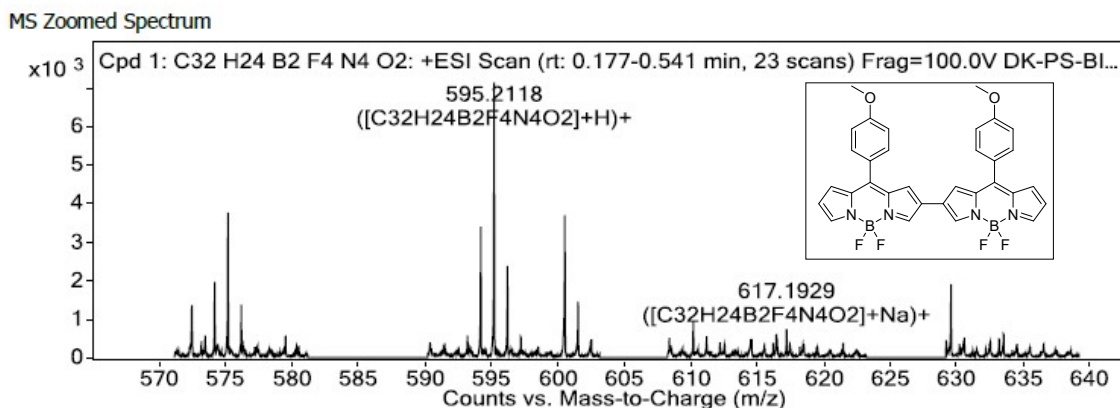

## V. Photophysical properties

**Table S7.** Photophysical properties of **4e**, **5h** and **5i** (10  $\mu$ M) in dichloromethane

| Compound. | $\lambda_{\text{abs}}$ (nm) | $\epsilon$ (M <sup>-1</sup> cm <sup>-1</sup> ) | $\lambda_{\text{em}}$ (nm) | $\phi_f$ | Stoke's shift (nm) |
|-----------|-----------------------------|------------------------------------------------|----------------------------|----------|--------------------|
| <b>4e</b> | 493                         | 137320                                         | 518                        | 0.06     | 25                 |
|           | 359                         | 41570                                          | -                          | -        | -                  |
| <b>5h</b> | 590                         | 132870                                         | 611                        | 0.021    | 21                 |
|           | 436                         | 106930                                         | -                          | -        | -                  |
|           | 354                         | 94580                                          | -                          | -        | -                  |
| <b>5i</b> | 600                         | 110080                                         | 665                        | 0.022    | 65                 |
|           | 450                         | 112790                                         | -                          | -        | -                  |
|           | 354                         | 78050                                          | -                          | -        | -                  |

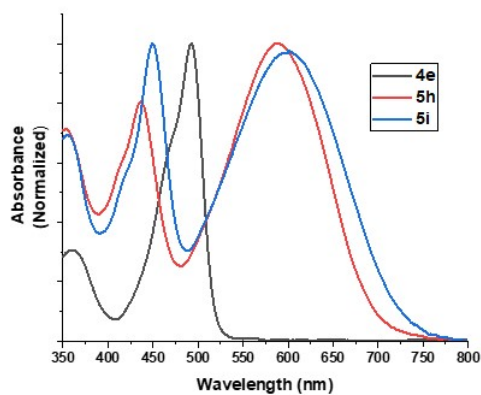

**Fig. S2a.** Normalized UV-Visible absorption spectra of **4e**, **5h** and **5i** in dichloromethane (10  $\mu$ M)

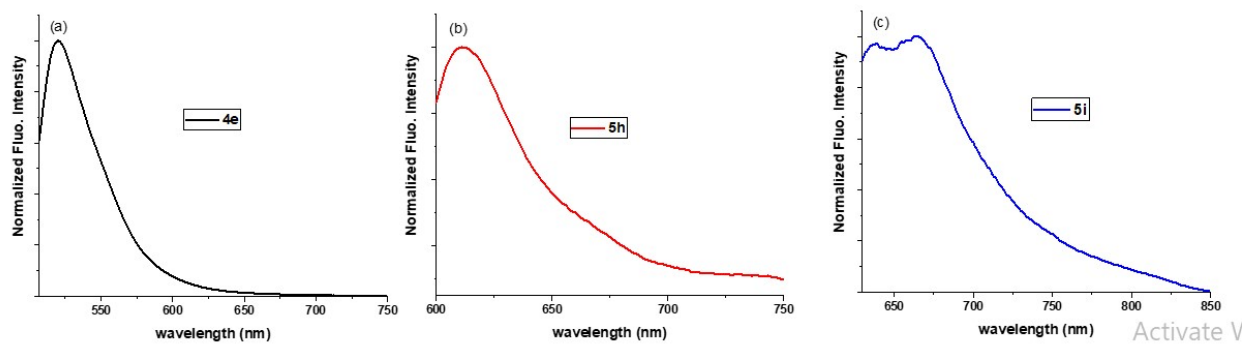

**Fig. S2b.** Normalized emission spectra of **4e** ( $\lambda_{\text{ex}}$ : 490 nm), **5h** ( $\lambda_{\text{ex}}$ : 580 nm) and **5i** ( $\lambda_{\text{ex}}$ : 615 nm) in dichloromethane (10  $\mu\text{M}$ ); slit width: 5 nm

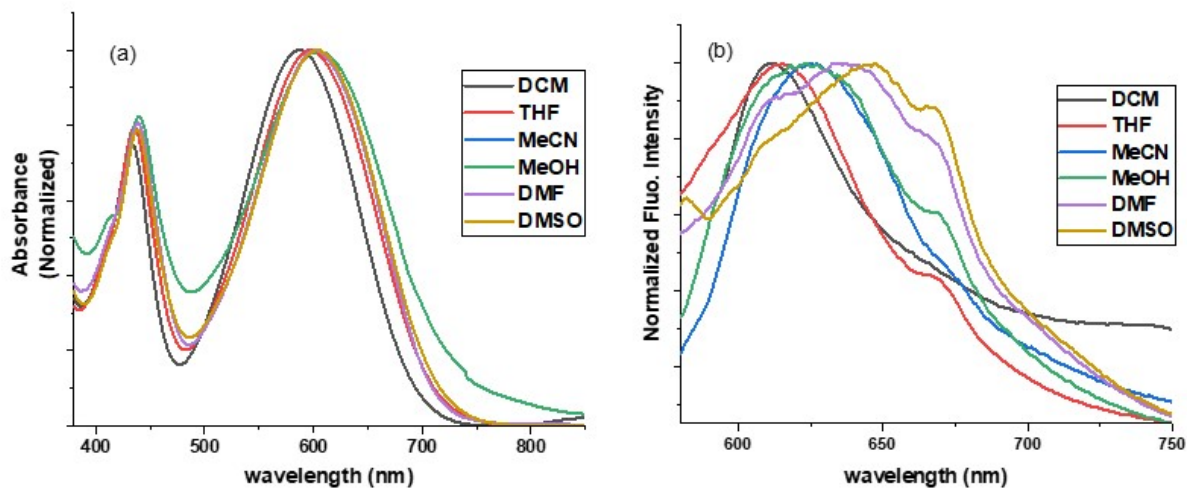

**Fig. S3.** UV-Visible (a) Normalized absorption spectra (b) Normalized emission spectra of **5h** (10  $\mu\text{M}$ ) in different solvents ( $\lambda_{\text{ex}}$ : 580 nm; slit width: 5 nm)

**Table S8.** Photophysical properties of **5h** (10  $\mu\text{M}$ ) in different solvents

| Solvent | $\lambda_{\text{abs}}/\text{nm}$ | $\lambda_{\text{em}}/\text{nm}$ | Stoke's shift/nm |
|---------|----------------------------------|---------------------------------|------------------|
| DCM     | 590                              | 611                             | 21               |
| THF     | 598                              | 615                             | 17               |
| MeCN    | 600                              | 624                             | 24               |
| MeOH    | 600                              | 625                             | 25               |
| DMF     | 601                              | 633                             | 32               |
| DMSO    | 603                              | 647                             | 44               |



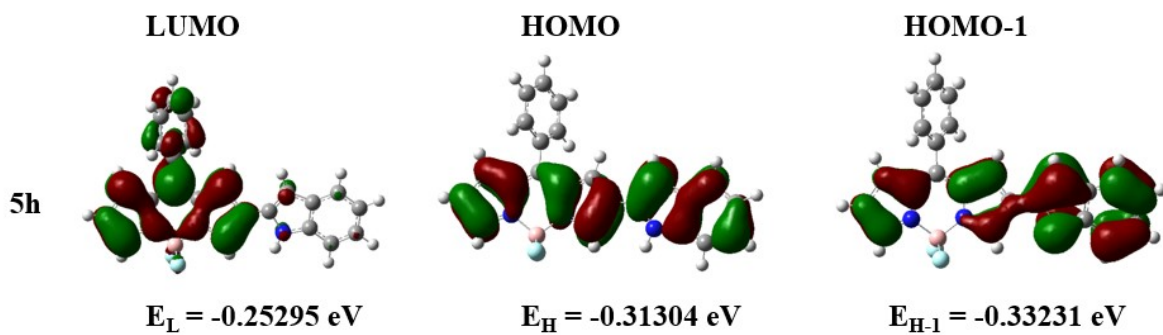

**Fig. S4.** DFT calculated frontier molecular orbitals

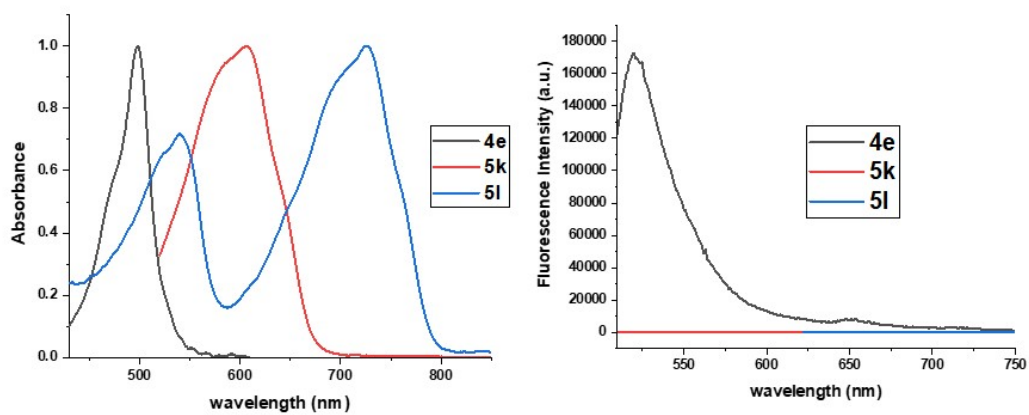

**Fig. S5.** UV-Visible (a) Absorption spectra (b) Emission spectra of **4e**, **5k** and **5l** in dichloromethane

**Table S9.** Summary of photophysical properties of BODIPY derivatives **4(a-e)** in different solvents.

| Compound  | Solvent  | $\lambda_{\text{abs}}$<br>/nm | $\nu_{\text{abs}}$<br>/cm <sup>-1</sup> | $\lambda_{\text{em}}$<br>/nm | $\nu_{\text{em}}$<br>/cm <sup>-1</sup> | Stokes<br>shift<br>/cm <sup>-1</sup> | $\phi_{\text{f}}$<br>/10 <sup>-2</sup> | $\tau_{\text{av}}$<br>/ns | $\kappa_{\text{r}}$<br>/ns <sup>-1</sup> | $\Sigma\kappa_{\text{nr}}$<br>/ns <sup>-1</sup> |
|-----------|----------|-------------------------------|-----------------------------------------|------------------------------|----------------------------------------|--------------------------------------|----------------------------------------|---------------------------|------------------------------------------|-------------------------------------------------|
| <b>4a</b> | DCM      | 495                           | 20202                                   | 519                          | 19268                                  | 934                                  | 30.08                                  | 0.22                      | 1.37                                     | 3.18                                            |
|           | DMSO     | 496                           | 20161                                   | 519                          | 19268                                  | 893                                  | 6.21                                   | 0.07                      | 0.89                                     | 13.40                                           |
|           | Methanol | 488                           | 20492                                   | 510                          | 19608                                  | 884                                  | 9.98                                   | 0.16                      | 0.62                                     | 5.63                                            |
|           | Water    | 482                           | 20747                                   | 511                          | 19569                                  | 1177                                 | 14.79                                  | 0.15                      | 0.99                                     | 5.68                                            |
| <b>4b</b> | DCM      | 507                           | 19724                                   | 515                          | 19417                                  | 306                                  | 79.33                                  | 1.79                      | 0.44                                     | 0.12                                            |
|           | DMSO     | 502                           | 19920                                   | 515                          | 19417                                  | 503                                  | 7.27                                   | 2.47                      | 0.03                                     | 0.38                                            |
|           | Methanol | 487                           | 20534                                   | 530                          | 18868                                  | 1666                                 | 7.19                                   | 0.69                      | 0.10                                     | 1.35                                            |
|           | Water    | 495                           | 20202                                   | 513                          | 19493                                  | 709                                  | 13.19                                  | 2.33                      | 0.06                                     | 0.37                                            |
| <b>4c</b> | DCM      | 489                           | 20450                                   | 507                          | 19724                                  | 726                                  | 5.30                                   | 1.51                      | 0.04                                     | 0.63                                            |
|           | DMSO     | 492                           | 20325                                   | 508                          | 19685                                  | 640                                  | 7.56                                   | 0.70                      | 0.11                                     | 1.32                                            |
|           | Methanol | 484                           | 20661                                   | 526                          | 19011                                  | 1650                                 | 4.91                                   | 2.84                      | 0.02                                     | 0.33                                            |
|           | Water    | 488                           | 20492                                   | 526                          | 19011                                  | 1480                                 | 1.39                                   | 2.43                      | 0.01                                     | 0.41                                            |
| <b>4d</b> | DCM      | 492                           | 20325                                   | 508                          | 19685                                  | 640                                  | 40.09                                  | 1.27                      | 0.32                                     | 0.47                                            |
|           | DMSO     | 493                           | 20284                                   | 509                          | 19646                                  | 638                                  | 30.88                                  | 0.79                      | 0.39                                     | 0.87                                            |
|           | Methanol | 485                           | 20619                                   | 500                          | 20000                                  | 619                                  | 18.22                                  | 1.38                      | 0.13                                     | 0.59                                            |
|           | Water    | 485                           | 20619                                   | 500                          | 20000                                  | 619                                  | 7.85                                   | 1.22                      | 0.06                                     | 0.75                                            |
| <b>4e</b> | DCM      | 493                           | 20284                                   | 518                          | 19305                                  | 979                                  | 6.50                                   | 0.36                      | 0.18                                     | 2.60                                            |
|           | DMSO     | 496                           | 20161                                   | 516                          | 19380                                  | 781                                  | 1.50                                   | 0.35                      | 0.04                                     | 2.81                                            |
|           | Methanol | 488                           | 20492                                   | 511                          | 19569                                  | 922                                  | 3.80                                   | 0.25                      | 0.15                                     | 3.85                                            |
|           | Water    | 487                           | 20534                                   | 510                          | 19608                                  | 926                                  | 5.00                                   | 0.16                      | 0.31                                     | 5.94                                            |

**Table S10.** Binding constant ( $K_a$ ) and values of thermodynamic parameters  $\Delta G$ ,  $\Delta H$  and  $\Delta S$  for the interaction of BODIPY-BSA at different temperatures.

| Compound  | Temp /K | $K_a/10^5 \text{ M}^{-1}$ | $\Delta G/ \text{kJ mol}^{-1}$ | $\Delta H/ \text{kJ mol}^{-1}$ | $\Delta S/ \text{kJ K}^{-1}\text{mol}^{-1}$ |
|-----------|---------|---------------------------|--------------------------------|--------------------------------|---------------------------------------------|
| <b>4a</b> | 298     | $4.58 \pm 0.8$            | -32.46                         | $-112.92 \pm 0.2$              | $-0.27 \pm 0.003$                           |
|           | 303     | $3.55 \pm 0.5$            | -31.11                         |                                |                                             |
|           | 308     | $2.56 \pm 0.6$            | -29.76                         |                                |                                             |
|           | 313     | $3.27 \pm 0.3$            | -28.41                         |                                |                                             |
|           | 318     | $4.62 \pm 0.2$            | -27.06                         |                                |                                             |
| <b>4c</b> | 298     | $2.17 \pm 0.8$            | -29.78                         | $-41.70 \pm 0.6$               | $-0.04 \pm 0.001$                           |
|           | 303     | $1.80 \pm 0.8$            | -29.58                         |                                |                                             |
|           | 308     | $2.22 \pm 0.4$            | -29.38                         |                                |                                             |
|           | 313     | $0.80 \pm 0.1$            | -29.18                         |                                |                                             |
|           | 318     | $0.84 \pm 0.1$            | -28.98                         |                                |                                             |
| <b>4d</b> | 298     | $0.25 \pm 0.2$            | -28.04                         | $-51.88 \pm 0.5$               | $-0.08 \pm 0.002$                           |
|           | 303     | $0.48 \pm 0.1$            | -27.64                         |                                |                                             |
|           | 308     | $0.37 \pm 0.1$            | -27.24                         |                                |                                             |
|           | 313     | $0.29 \pm 0.1$            | -26.84                         |                                |                                             |
|           | 318     | $0.18 \pm 0.2$            | -26.44                         |                                |                                             |
| <b>4e</b> | 298     | $0.61 \pm 0.2$            | -27.36                         | $47.14 \pm 0.10$               | $0.25 \pm 0.003$                            |
|           | 303     | $1.73 \pm 0.3$            | -28.61                         |                                |                                             |
|           | 308     | $1.41 \pm 0.5$            | -29.86                         |                                |                                             |
|           | 313     | $1.96 \pm 0.1$            | -31.11                         |                                |                                             |
|           | 315     | $1.84 \pm 0.3$            | -32.36                         |                                |                                             |

**Table S11:** Lifetime decay parameters of **4a**, **4c**, **4d** and **4e** with increasing concentration of BSA.

| Compound  | [BSA]/ $\mu\text{M}$ | $\alpha_1$ | $\tau_1$ /ns | $\alpha_2$ | $\tau_2$ /ns | $\tau_{av}$ /ns |
|-----------|----------------------|------------|--------------|------------|--------------|-----------------|
| <b>4a</b> | 0                    | 100.00     | 0.16         | 0.00       | 0.00         | 0.16            |
|           | 1                    | 99.75      | 0.15         | 0.25       | 2.65         | 0.26            |
|           | 3                    | 99.72      | 0.15         | 0.28       | 3.10         | 0.31            |
|           | 5                    | 99.44      | 0.16         | 0.56       | 3.25         | 0.48            |
|           | 10                   | 99.02      | 0.19         | 0.98       | 3.32         | 0.65            |
|           | 15                   | 98.20      | 0.23         | 1.81       | 3.06         | 0.78            |
|           | 20                   | 98.35      | 0.25         | 1.65       | 3.27         | 0.79            |
|           | 25                   | 97.97      | 0.30         | 2.03       | 3.40         | 0.89            |
|           | 30                   | 97.20      | 0.34         | 2.80       | 3.37         | 1.02            |
| <b>4c</b> | 0                    | 59.73      | 0.72         | 40.27      | 3.94         | 3.25            |
|           | 1                    | 64.66      | 1.43         | 35.34      | 4.81         | 3.62            |
|           | 3                    | 62.35      | 1.15         | 37.65      | 4.67         | 3.66            |
|           | 5                    | 65.87      | 1.09         | 34.13      | 4.61         | 3.51            |
|           | 10                   | 69.11      | 1.03         | 30.89      | 4.58         | 3.39            |
|           | 15                   | 72.23      | 0.95         | 27.77      | 4.37         | 3.14            |
|           | 20                   | 72.17      | 1.06         | 27.83      | 4.47         | 3.17            |
|           | 25                   | 73.86      | 1.12         | 26.14      | 4.46         | 3.07            |
|           | 30                   | 73.75      | 1.08         | 26.25      | 4.43         | 3.07            |
| 35        | 74.35                | 0.98       | 25.65        | 4.24       | 2.93         |                 |
| <b>4d</b> | 0                    | 64.16      | 3.69         | 35.84      | 1.11         | 3.32            |
|           | 1                    | 51.05      | 3.54         | 48.95      | 0.71         | 3.08            |
|           | 3                    | 58.31      | 3.55         | 41.69      | 0.78         | 3.18            |
|           | 5                    | 57.40      | 3.85         | 42.60      | 0.99         | 3.39            |
|           | 10                   | 53.15      | 0.86         | 46.85      | 3.86         | 3.25            |
|           | 15                   | 64.82      | 0.76         | 35.18      | 4.00         | 3.16            |
|           | 20                   | 70.18      | 0.75         | 29.82      | 3.92         | 2.93            |
|           | 25                   | 74.49      | 0.86         | 25.51      | 4.01         | 2.80            |
|           | 28                   | 76.56      | 0.90         | 23.44      | 3.98         | 2.67            |
|           | 30                   | 75.86      | 0.93         | 24.14      | 4.01         | 2.71            |
|           | 35                   | 72.22      | 0.92         | 27.78      | 3.96         | 2.82            |
| 40        | 72.19                | 0.85       | 27.81        | 3.80       | 2.72         |                 |
| <b>4e</b> | 0                    | 88.71      | 0.15         | 11.29      | 0.01         | 0.14            |
|           | 1                    | 98.79      | 0.14         | 1.211      | 1.86         | 0.38            |
|           | 3                    | 95.49      | 0.15         | 4.509      | 2.12         | 0.94            |
|           | 5                    | 90.41      | 0.20         | 9.591      | 2.23         | 1.30            |
|           | 10                   | 80.71      | 0.31         | 19.29      | 2.37         | 1.64            |
|           | 15                   | 75.56      | 0.41         | 24.44      | 2.43         | 1.74            |
|           | 20                   | 68.29      | 0.37         | 31.71      | 2.25         | 1.76            |
|           | 25                   | 67.7       | 0.49         | 32.3       | 2.41         | 1.83            |
|           | 28                   | 66.68      | 0.49         | 33.32      | 2.39         | 1.84            |
|           | 30                   | 69.22      | 0.63         | 30.78      | 2.51         | 1.83            |
|           | 35                   | 66.83      | 0.74         | 33.17      | 2.53         | 1.87            |
| 40        | 66.17                | 0.79       | 33.83        | 2.57       | 1.90         |                 |

**Table S12.** Thermodynamic parameters obtained from ITC measurements.

| Compound  | $K_a/10^3 \text{ M}^{-1}$ | $\Delta G/ \text{kJ mol}^{-1}$ | $\Delta H/10^4 \text{ kJ mol}^{-1}$ | $\Delta S/10^2 \text{ kJ K}^{-1}\text{mol}^{-1}$ |
|-----------|---------------------------|--------------------------------|-------------------------------------|--------------------------------------------------|
| <b>4a</b> | $1.19 \pm 0.1$            | -174                           | $-7.08 \pm 0.2$                     | -2.37                                            |
| <b>4c</b> | $1.03 \pm 0.1$            | -286                           | $-7.27 \pm 0.4$                     | -2.43                                            |
| <b>4d</b> | $0.52 \pm 0.05$           | -580                           | $-54.89 \pm 0.9$                    | -18.40                                           |
| <b>4e</b> | $0.98 \pm 0.02$           | -338                           | $-6.58 \pm 0.2$                     | -2.20                                            |

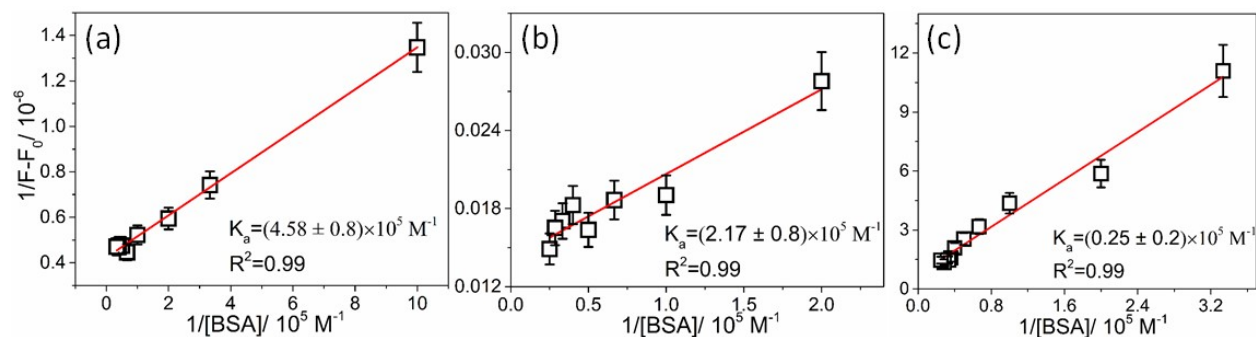**Fig. S6.** B-H plot for calculation of binding constant of **4a**, **4c** and **4d** with BSA.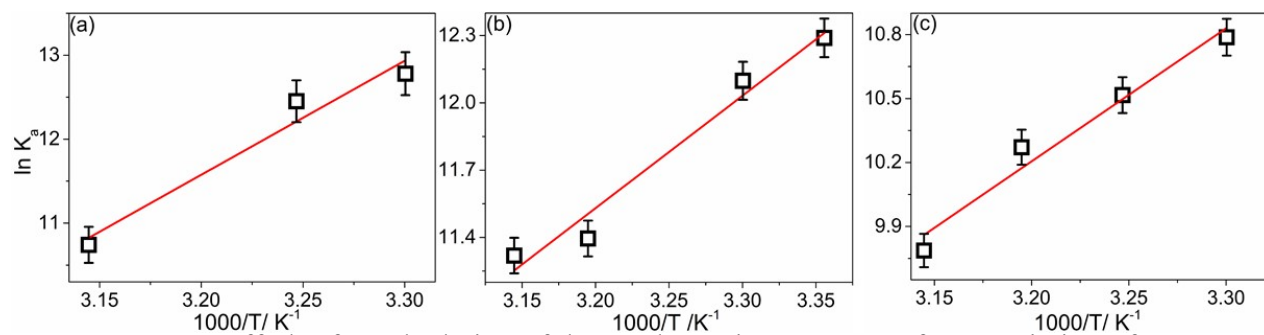**Fig. S7.** Van't Hoff plot for calculation of thermodynamic parameters for association of **4a**, **4c** and **4d** with BSA.**Table S13.** Calculated values of LOD and LOQ for detection of BSA for the compounds **4a**, **4c**, **4d** and **4e**.

|           | LOD/ mg ml <sup>-1</sup> | LOQ/ mg ml <sup>-1</sup> |
|-----------|--------------------------|--------------------------|
| <b>4a</b> | 0.21                     | 0.71                     |
| <b>4c</b> | 0.007                    | 0.02                     |
| <b>4d</b> | 0.32                     | 1.08                     |
| <b>4e</b> | 0.02                     | 0.05                     |
