# Supplementary material for: BODIPY(aryl)iodonium salts in the efficient synthesis of diversely functionalized BODIPYs and selective detection of serum albumin
Source: Royal Society of Chemistry journal article supplement (doi:10.1039/d4ob00336e), 2024-01-01
Supplement: d4ob00336e2.pdf [file d4ob00336e2.pdf]

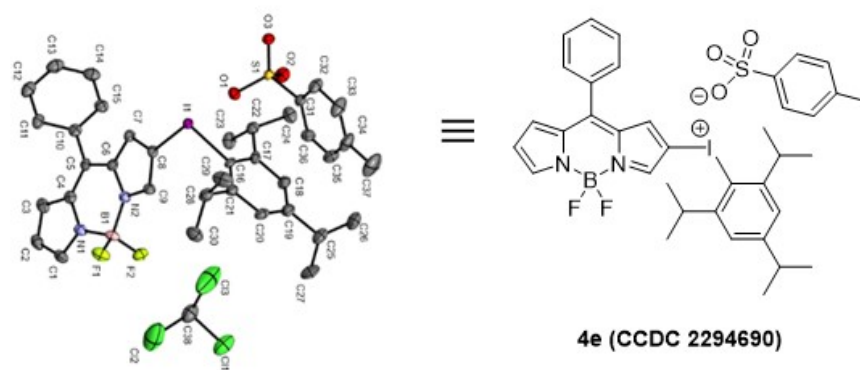

**Figure. S1:** The ORTEP diagram of compound (**4e**) (CCDC 2294690). (The thermal ellipsoid is drawn at the 50 % probability level.)

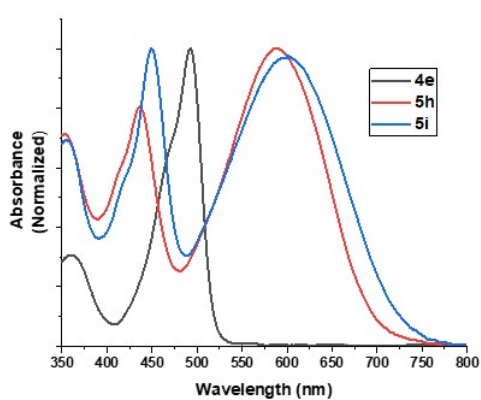

**Fig. S2a.** Normalized UV-Visible absorption spectra of **4e**, **5h** and **5i** in dichloromethane (10  $\mu$ M)

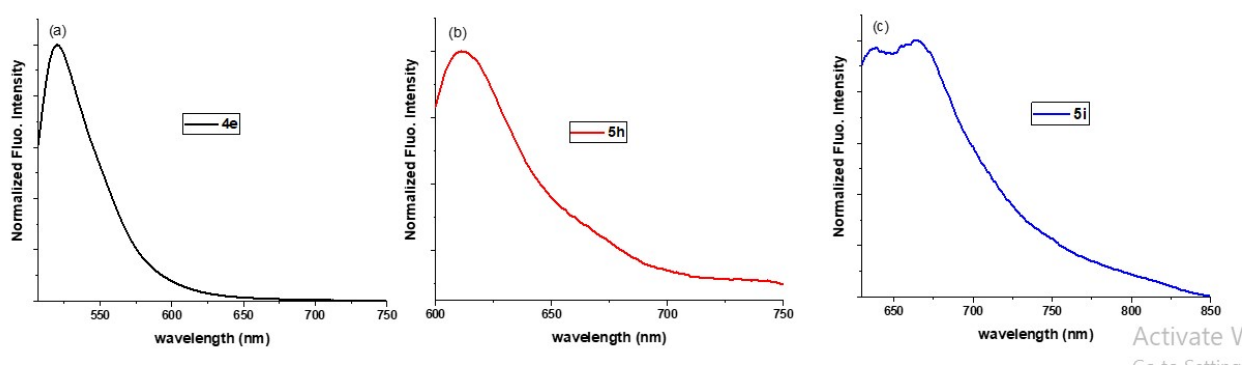

**Fig. S2b.** Normalized emission spectra of **4e** ( $\lambda_{\text{ex}}$ : 490 nm), **5h** ( $\lambda_{\text{ex}}$ : 580 nm) and **5i** ( $\lambda_{\text{ex}}$ : 615 nm) in dichloromethane (10  $\mu$ M); slit width: 5 nm

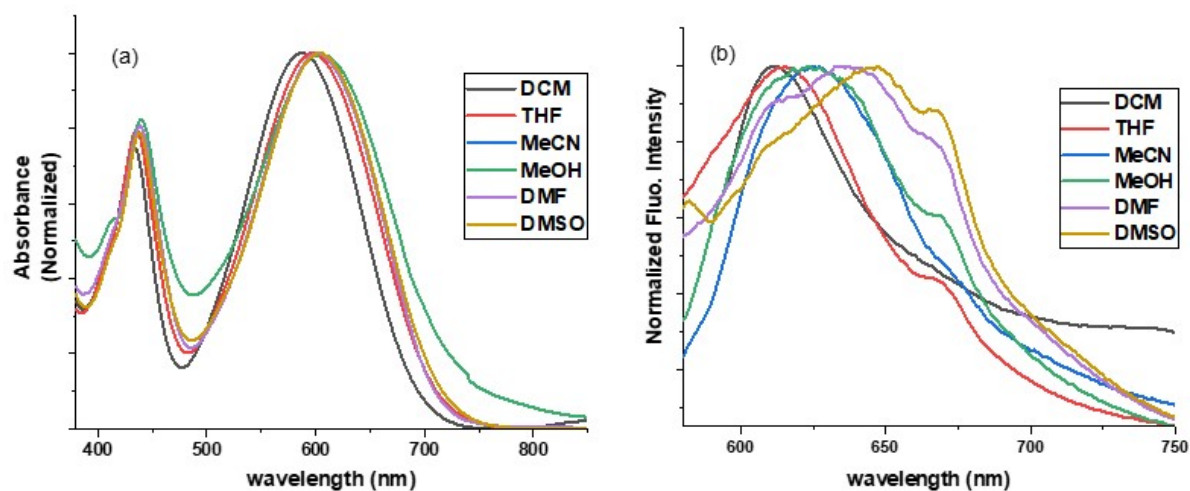

**Fig. S3.** UV-Visible (a) Normalized absorption spectra (b) Normalized emission spectra of **5h** (10  $\mu$ M) in different solvents ( $\lambda_{\text{ex}}$ : 580 nm; slit width: 5 nm)

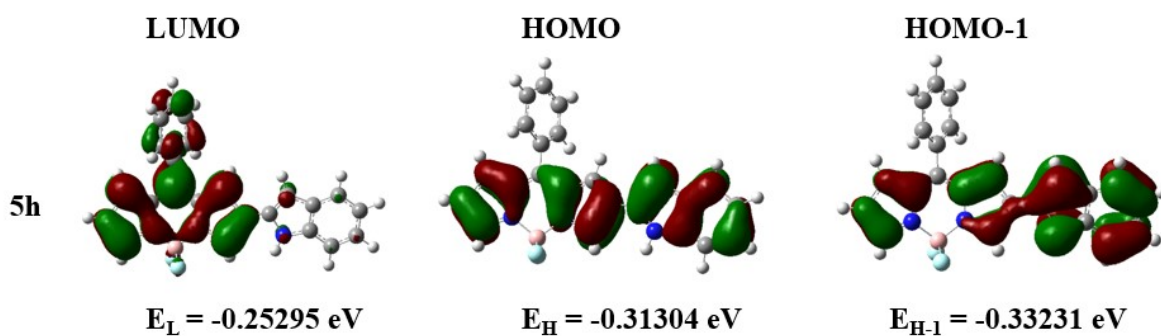

**Fig. S4.** DFT calculated frontier molecular orbitals

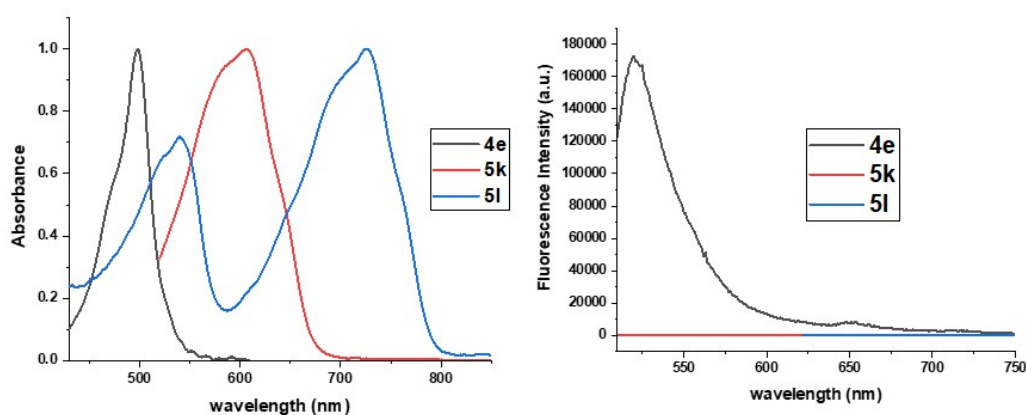

**Fig. S5.** UV-Visible (a) Absorption spectra (b) Emission spectra of **4e**, **5k** and **5l** in dichloromethane

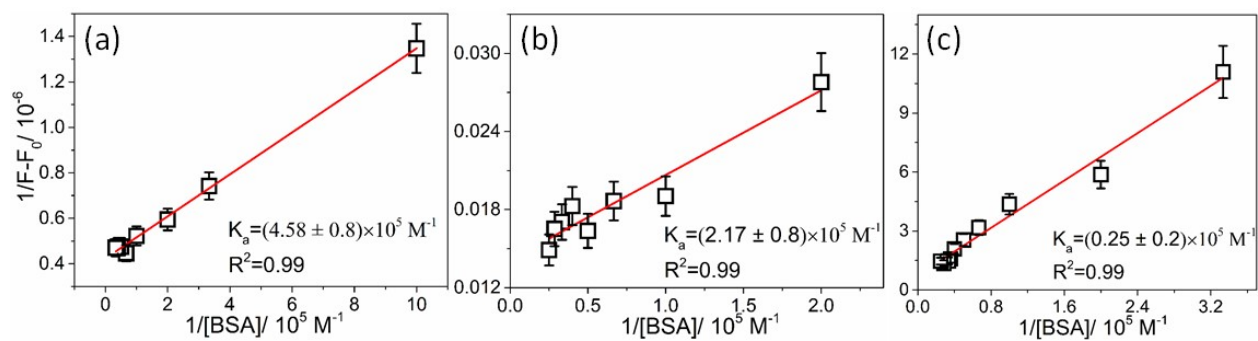

**Fig. S6.** B-H plot for calculation of binding constant of **4a**, **4c** and **4d** with BSA.

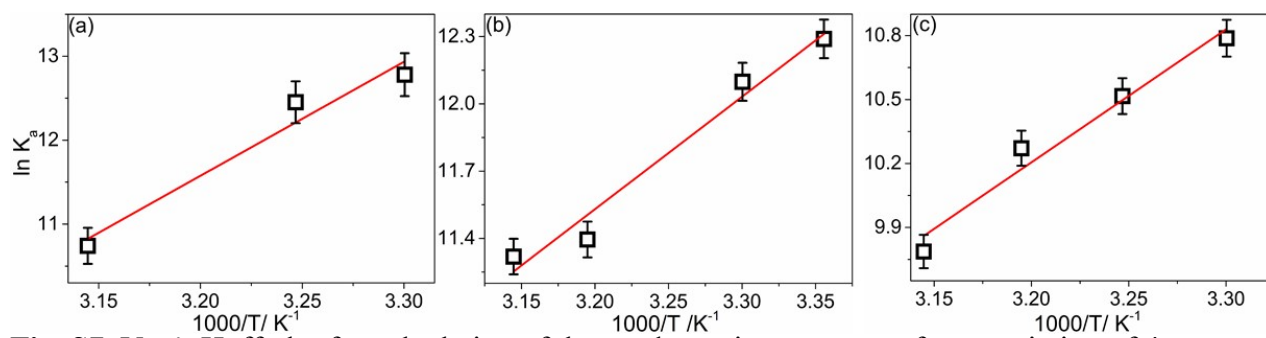

**Fig. S7.** Van't Hoff plot for calculation of thermodynamic parameters for association of **4a**, **4c** and **4d** with BSA.
